# Supplementary material for: Time-Course Transcriptome Analysis Reveals Resistance Genes of Panax ginseng Induced by Cylindrocarpon destructans Infection Using RNA-Seq
Source: PLoS One. 2016 Feb 18;11(2):e0149408. doi: 10.1371/journal.pone.0149408 (PMC4758610; doi:10.1371/journal.pone.0149408)
Supplement: S2 Table — (XLS) [file pone.0149408.s009.xls]

## Sheet: up_GO.xls
Unigenes	GO ID	TYPE	Description
c1017_g1	GO:0015991	biological_process	ATP hydrolysis coupled proton transport
c1179_g1	GO:0005975	biological_process	carbohydrate metabolic process
c1179_g1	GO:0052695	biological_process	cellular glucuronidation
c1179_g1	GO:0019255	biological_process	glucose 1-phosphate metabolic process
c1179_g1	GO:0006006	biological_process	glucose metabolic process
c1179_g1	GO:0005978	biological_process	glycogen biosynthetic process
c1179_g1	GO:0044281	biological_process	small molecule metabolic process
c1179_g1	GO:0006011	biological_process	UDP-glucose metabolic process
c1179_g1	GO:0006065	biological_process	UDP-glucuronate biosynthetic process
c1179_g1	GO:0006805	biological_process	xenobiotic metabolic process
c1179_g1	GO:0005975	biological_process	carbohydrate metabolic process
c1179_g1	GO:0052695	biological_process	cellular glucuronidation
c1179_g1	GO:0019255	biological_process	glucose 1-phosphate metabolic process
c1179_g1	GO:0006006	biological_process	glucose metabolic process
c1179_g1	GO:0005978	biological_process	glycogen biosynthetic process
c1179_g1	GO:0044281	biological_process	small molecule metabolic process
c1179_g1	GO:0006011	biological_process	UDP-glucose metabolic process
c1179_g1	GO:0006065	biological_process	UDP-glucuronate biosynthetic process
c1179_g1	GO:0006805	biological_process	xenobiotic metabolic process
c2813_g1	GO:0045040	biological_process	protein import into mitochondrial outer membrane
c2887_g1	GO:0006120	biological_process	mitochondrial electron transport, NADH to ubiquinone
c2906_g1	GO:0051298	biological_process	centrosome duplication
c2906_g1	GO:0008407	biological_process	chaeta morphogenesis
c2906_g1	GO:0007219	biological_process	Notch signaling pathway
c2906_g1	GO:0006412	biological_process	translation
c2966_g1	GO:0002164	biological_process	larval development
c2966_g1	GO:0002164	biological_process	larval development
c4695_g1	GO:0044237	biological_process	cellular metabolic process
c4695_g1	GO:0006850	biological_process	mitochondrial pyruvate transport
c4695_g1	GO:0006090	biological_process	pyruvate metabolic process
c4695_g1	GO:0044281	biological_process	small molecule metabolic process
c4824_g1	GO:0006412	biological_process	translation
c7847_g1	GO:0051298	biological_process	centrosome duplication
c7847_g1	GO:0006412	biological_process	translation
c8409_g1	GO:0008637	biological_process	apoptotic mitochondrial changes
c8409_g1	GO:0006161	biological_process	deoxyguanosine catabolic process
c8409_g1	GO:0006149	biological_process	deoxyinosine catabolic process
c8409_g1	GO:0046070	biological_process	dGTP metabolic process
c8409_g1	GO:0006183	biological_process	GTP biosynthetic process
c8409_g1	GO:0046115	biological_process	guanosine catabolic process
c8409_g1	GO:0006148	biological_process	inosine catabolic process
c8409_g1	GO:0008630	biological_process	intrinsic apoptotic signaling pathway in response to DNA damage
c8409_g1	GO:0070233	biological_process	negative regulation of T cell apoptotic process
c8409_g1	GO:0046638	biological_process	positive regulation of alpha-beta T cell differentiation
c8409_g1	GO:0045579	biological_process	positive regulation of B cell differentiation
c8409_g1	GO:0045739	biological_process	positive regulation of DNA repair
c8409_g1	GO:0001916	biological_process	positive regulation of T cell mediated cytotoxicity
c8409_g1	GO:0042102	biological_process	positive regulation of T cell proliferation
c8409_g1	GO:0042278	biological_process	purine nucleoside metabolic process
c8409_g1	GO:0010332	biological_process	response to gamma radiation
c8409_g1	GO:0034418	biological_process	urate biosynthetic process
c8847_g1	GO:0045454	biological_process	cell redox homeostasis
c10205_g1	GO:0033344	biological_process	cholesterol efflux
c10205_g1	GO:0042632	biological_process	cholesterol homeostasis
c10205_g1	GO:0008203	biological_process	cholesterol metabolic process
c10205_g1	GO:0030301	biological_process	cholesterol transport
c10205_g1	GO:0032367	biological_process	intracellular cholesterol transport
c10205_g1	GO:0009615	biological_process	response to virus
c10592_g1	GO:0006281	biological_process	DNA repair
c10592_g1	GO:0006355	biological_process	regulation of transcription, DNA-templated
c10592_g1	GO:0006351	biological_process	transcription, DNA-templated
c10919_g1	GO:0042048	biological_process	olfactory behavior
c10919_g1	GO:0019236	biological_process	response to pheromone
c10919_g1	GO:0007606	biological_process	sensory perception of chemical stimulus
c10919_g1	GO:0007608	biological_process	sensory perception of smell
c10919_g1	GO:0006810	biological_process	transport
c11240_g1	GO:0006103	biological_process	2-oxoglutarate metabolic process
c11240_g1	GO:0006097	biological_process	glyoxylate cycle
c11240_g1	GO:0006102	biological_process	isocitrate metabolic process
c11240_g1	GO:0006099	biological_process	tricarboxylic acid cycle
c12129_g1	GO:0048102	biological_process	autophagic cell death
c12129_g1	GO:0006325	biological_process	chromatin organization
c12129_g1	GO:0009790	biological_process	embryo development
c12129_g1	GO:0016321	biological_process	female meiosis chromosome segregation
c12129_g1	GO:0007067	biological_process	mitotic nuclear division
c12129_g1	GO:0007076	biological_process	mitotic chromosome condensation
c12129_g1	GO:0000022	biological_process	mitotic spindle elongation
c12129_g1	GO:0007052	biological_process	mitotic spindle organization
c12129_g1	GO:0022008	biological_process	neurogenesis
c12129_g1	GO:0030307	biological_process	positive regulation of cell growth
c12129_g1	GO:0001558	biological_process	regulation of cell growth
c12129_g1	GO:0006417	biological_process	regulation of translation
c12129_g1	GO:0016070	biological_process	RNA metabolic process
c12129_g1	GO:0035071	biological_process	salivary gland cell autophagic cell death
c12129_g1	GO:0006412	biological_process	translation
c12129_g1	GO:0006413	biological_process	translational initiation
c12181_g1	GO:0000902	biological_process	cell morphogenesis
c12181_g1	GO:0007067	biological_process	mitotic nuclear division
c12181_g1	GO:0016055	biological_process	Wnt signaling pathway
c12379_g1	GO:1902600	biological_process	hydrogen ion transmembrane transport
c12379_g1	GO:0006122	biological_process	mitochondrial electron transport, ubiquinol to cytochrome c
c12379_g1	GO:0017062	biological_process	respiratory chain complex III assembly
c12930_g1	GO:0007275	biological_process	multicellular organismal development
c12930_g1	GO:0010998	biological_process	regulation of translational initiation by eIF2 alpha phosphorylation
c13030_g1	GO:0015986	biological_process	ATP synthesis coupled proton transport
c13030_g1	GO:0046331	biological_process	lateral inhibition
c13128_g1	GO:0008219	biological_process	cell death
c13128_g1	GO:0071456	biological_process	cellular response to hypoxia
c13128_g1	GO:0051607	biological_process	defense response to virus
c13128_g1	GO:0016042	biological_process	lipid catabolic process
c13128_g1	GO:0006629	biological_process	lipid metabolic process
c13128_g1	GO:0031408	biological_process	oxylipin biosynthetic process
c13128_g1	GO:0009626	biological_process	plant-type hypersensitive response
c13128_g1	GO:0046686	biological_process	response to cadmium ion
c13128_g1	GO:0008219	biological_process	cell death
c13128_g1	GO:0071456	biological_process	cellular response to hypoxia
c13128_g1	GO:0051607	biological_process	defense response to virus
c13128_g1	GO:0016042	biological_process	lipid catabolic process
c13128_g1	GO:0006629	biological_process	lipid metabolic process
c13128_g1	GO:0031408	biological_process	oxylipin biosynthetic process
c13128_g1	GO:0009626	biological_process	plant-type hypersensitive response
c13128_g1	GO:0046686	biological_process	response to cadmium ion
c13443_g1	GO:0000412	biological_process	histone peptidyl-prolyl isomerization
c13443_g1	GO:0035626	biological_process	juvenile hormone mediated signaling pathway
c13443_g1	GO:0010507	biological_process	negative regulation of autophagy
c13443_g1	GO:0016242	biological_process	negative regulation of macroautophagy
c13443_g1	GO:0018208	biological_process	peptidyl-proline modification
c13443_g1	GO:0006457	biological_process	protein folding
c13836_g1	GO:0030041	biological_process	actin filament polymerization
c13836_g1	GO:0034314	biological_process	Arp2/3 complex-mediated actin nucleation
c13859_g1	GO:0008203	biological_process	cholesterol metabolic process
c13859_g1	GO:0042446	biological_process	hormone biosynthetic process
c13859_g1	GO:0055114	biological_process	oxidation-reduction process
c13859_g1	GO:0006694	biological_process	steroid biosynthetic process
c14192_g1	GO:0000272	biological_process	polysaccharide catabolic process
c14340_g1	GO:0055114	biological_process	oxidation-reduction process
c14340_g1	GO:0045610	biological_process	regulation of hemocyte differentiation
c14340_g1	GO:0035206	biological_process	regulation of hemocyte proliferation
c14864_g1	GO:0051298	biological_process	centrosome duplication
c14864_g1	GO:0000022	biological_process	mitotic spindle elongation
c14864_g1	GO:0007052	biological_process	mitotic spindle organization
c14864_g1	GO:0006412	biological_process	translation
c17353_g1	GO:0055114	biological_process	oxidation-reduction process
c17426_g1	GO:0007015	biological_process	actin filament organization
c17426_g1	GO:0007628	biological_process	adult walking behavior
c17426_g1	GO:0042491	biological_process	auditory receptor cell differentiation
c17426_g1	GO:0060088	biological_process	auditory receptor cell stereocilium organization
c17426_g1	GO:0050973	biological_process	detection of mechanical stimulus involved in equilibrioception
c17426_g1	GO:0050910	biological_process	detection of mechanical stimulus involved in sensory perception of sound
c17426_g1	GO:0007156	biological_process	homophilic cell adhesion
c17426_g1	GO:0048839	biological_process	inner ear development
c17426_g1	GO:0007626	biological_process	locomotory behavior
c17426_g1	GO:0002009	biological_process	morphogenesis of an epithelium
c17426_g1	GO:0035264	biological_process	multicellular organism growth
c17426_g1	GO:0035058	biological_process	nonmotile primary cilium assembly
c17426_g1	GO:0060013	biological_process	righting reflex
c17426_g1	GO:0007605	biological_process	sensory perception of sound
c17426_g1	GO:0001964	biological_process	startle response
c17426_g1	GO:0007601	biological_process	visual perception
c18217_g1	GO:0009060	biological_process	aerobic respiration
c18217_g1	GO:0044237	biological_process	cellular metabolic process
c18217_g1	GO:1902600	biological_process	hydrogen ion transmembrane transport
c18217_g1	GO:0006122	biological_process	mitochondrial electron transport, ubiquinol to cytochrome c
c18217_g1	GO:0055114	biological_process	oxidation-reduction process
c18217_g1	GO:0006119	biological_process	oxidative phosphorylation
c18217_g1	GO:0051291	biological_process	protein heterooligomerization
c18217_g1	GO:0022904	biological_process	respiratory electron transport chain
c18217_g1	GO:0044281	biological_process	small molecule metabolic process
c18933_g1	GO:0006412	biological_process	translation
c19896_g1	GO:0051016	biological_process	barbed-end actin filament capping
c19896_g1	GO:0030837	biological_process	negative regulation of actin filament polymerization
c19896_g1	GO:0009408	biological_process	response to heat
c19896_g1	GO:0051016	biological_process	barbed-end actin filament capping
c19896_g1	GO:0030837	biological_process	negative regulation of actin filament polymerization
c19896_g1	GO:0009408	biological_process	response to heat
c25125_g1	GO:0030036	biological_process	actin cytoskeleton organization
c25125_g1	GO:0030037	biological_process	actin filament reorganization involved in cell cycle
c25125_g1	GO:0007413	biological_process	axonal fasciculation
c25125_g1	GO:0000902	biological_process	cell morphogenesis
c25125_g1	GO:0022416	biological_process	chaeta development
c25125_g1	GO:0007010	biological_process	cytoskeleton organization
c25125_g1	GO:0006886	biological_process	intracellular protein transport
c25125_g1	GO:0097320	biological_process	membrane tubulation
c25125_g1	GO:0007520	biological_process	myoblast fusion
c25125_g1	GO:0030713	biological_process	ovarian follicle cell stalk formation
c25125_g1	GO:0006909	biological_process	phagocytosis
c25125_g1	GO:0051491	biological_process	positive regulation of filopodium assembly
c25125_g1	GO:0010592	biological_process	positive regulation of lamellipodium assembly
c25125_g1	GO:0045747	biological_process	positive regulation of Notch signaling pathway
c25125_g1	GO:0030589	biological_process	pseudocleavage involved in syncytial blastoderm formation
c25421_g1	GO:0016099	biological_process	monoterpenoid biosynthetic process
c25438_g1	GO:0030325	biological_process	adrenal gland development
c25438_g1	GO:0007568	biological_process	aging
c25438_g1	GO:0006820	biological_process	anion transport
c25438_g1	GO:0006915	biological_process	apoptotic process
c25438_g1	GO:0048266	biological_process	behavioral response to pain
c25438_g1	GO:0008283	biological_process	cell proliferation
c25438_g1	GO:0071476	biological_process	cellular hypotonic response
c25438_g1	GO:0071222	biological_process	cellular response to lipopolysaccharide
c25438_g1	GO:0071294	biological_process	cellular response to zinc ion
c25438_g1	GO:0006821	biological_process	chloride transport
c25438_g1	GO:0060242	biological_process	contact inhibition
c25438_g1	GO:0008347	biological_process	glial cell migration
c25438_g1	GO:0006783	biological_process	heme biosynthetic process
c25438_g1	GO:0060253	biological_process	negative regulation of glial cell proliferation
c25438_g1	GO:0045019	biological_process	negative regulation of nitric oxide biosynthetic process
c25438_g1	GO:0032720	biological_process	negative regulation of tumor necrosis factor production
c25438_g1	GO:0014012	biological_process	peripheral nervous system axon regeneration
c25438_g1	GO:0043065	biological_process	positive regulation of apoptotic process
c25438_g1	GO:0051928	biological_process	positive regulation of calcium ion transport
c25438_g1	GO:0060252	biological_process	positive regulation of glial cell proliferation
c25438_g1	GO:0051901	biological_process	positive regulation of mitochondrial depolarization
c25438_g1	GO:0010940	biological_process	positive regulation of necrotic cell death
c25438_g1	GO:2000379	biological_process	positive regulation of reactive oxygen species metabolic process
c25438_g1	GO:0006626	biological_process	protein targeting to mitochondrion
c25438_g1	GO:0032374	biological_process	regulation of cholesterol transport
c25438_g1	GO:0050810	biological_process	regulation of steroid biosynthetic process
c25438_g1	GO:0042493	biological_process	response to drug
c25438_g1	GO:0010042	biological_process	response to manganese ion
c25438_g1	GO:0032570	biological_process	response to progesterone
c25438_g1	GO:0033574	biological_process	response to testosterone
c25438_g1	GO:0010266	biological_process	response to vitamin B1
c25438_g1	GO:0006694	biological_process	steroid biosynthetic process
c25438_g1	GO:0008202	biological_process	steroid metabolic process
c25438_g1	GO:0007268	biological_process	synaptic transmission
c25438_g1	GO:0030325	biological_process	adrenal gland development
c25438_g1	GO:0007568	biological_process	aging
c25438_g1	GO:0006820	biological_process	anion transport
c25438_g1	GO:0006915	biological_process	apoptotic process
c25438_g1	GO:0048266	biological_process	behavioral response to pain
c25438_g1	GO:0008283	biological_process	cell proliferation
c25438_g1	GO:0071476	biological_process	cellular hypotonic response
c25438_g1	GO:0071222	biological_process	cellular response to lipopolysaccharide
c25438_g1	GO:0071294	biological_process	cellular response to zinc ion
c25438_g1	GO:0006821	biological_process	chloride transport
c25438_g1	GO:0060242	biological_process	contact inhibition
c25438_g1	GO:0008347	biological_process	glial cell migration
c25438_g1	GO:0006783	biological_process	heme biosynthetic process
c25438_g1	GO:0060253	biological_process	negative regulation of glial cell proliferation
c25438_g1	GO:0045019	biological_process	negative regulation of nitric oxide biosynthetic process
c25438_g1	GO:0032720	biological_process	negative regulation of tumor necrosis factor production
c25438_g1	GO:0014012	biological_process	peripheral nervous system axon regeneration
c25438_g1	GO:0043065	biological_process	positive regulation of apoptotic process
c25438_g1	GO:0051928	biological_process	positive regulation of calcium ion transport
c25438_g1	GO:0060252	biological_process	positive regulation of glial cell proliferation
c25438_g1	GO:0051901	biological_process	positive regulation of mitochondrial depolarization
c25438_g1	GO:0010940	biological_process	positive regulation of necrotic cell death
c25438_g1	GO:2000379	biological_process	positive regulation of reactive oxygen species metabolic process
c25438_g1	GO:0006626	biological_process	protein targeting to mitochondrion
c25438_g1	GO:0032374	biological_process	regulation of cholesterol transport
c25438_g1	GO:0050810	biological_process	regulation of steroid biosynthetic process
c25438_g1	GO:0042493	biological_process	response to drug
c25438_g1	GO:0010042	biological_process	response to manganese ion
c25438_g1	GO:0032570	biological_process	response to progesterone
c25438_g1	GO:0033574	biological_process	response to testosterone
c25438_g1	GO:0010266	biological_process	response to vitamin B1
c25438_g1	GO:0006694	biological_process	steroid biosynthetic process
c25438_g1	GO:0008202	biological_process	steroid metabolic process
c25438_g1	GO:0007268	biological_process	synaptic transmission
c25874_g1	GO:0006412	biological_process	translation
c26891_g2	GO:0006066	biological_process	alcohol metabolic process
c27056_g1	GO:0061158	biological_process	3'-UTR-mediated mRNA destabilization
c27056_g1	GO:0010629	biological_process	negative regulation of gene expression
c27056_g1	GO:0016246	biological_process	RNA interference
c29113_g1	GO:0051298	biological_process	centrosome duplication
c29113_g1	GO:0051297	biological_process	centrosome organization
c29113_g1	GO:0006412	biological_process	translation
c30626_g1	GO:0006464	biological_process	cellular protein modification process
c30626_g1	GO:0005977	biological_process	glycogen metabolic process
c30626_g1	GO:0006555	biological_process	methionine metabolic process
c30626_g1	GO:0006730	biological_process	one-carbon metabolic process
c30626_g1	GO:0051289	biological_process	protein homotetramerization
c30626_g1	GO:0006111	biological_process	regulation of gluconeogenesis
c30626_g1	GO:0046500	biological_process	S-adenosylmethionine metabolic process
c30626_g1	GO:0006464	biological_process	cellular protein modification process
c30626_g1	GO:0005977	biological_process	glycogen metabolic process
c30626_g1	GO:0006555	biological_process	methionine metabolic process
c30626_g1	GO:0006730	biological_process	one-carbon metabolic process
c30626_g1	GO:0051289	biological_process	protein homotetramerization
c30626_g1	GO:0006111	biological_process	regulation of gluconeogenesis
c30626_g1	GO:0046500	biological_process	S-adenosylmethionine metabolic process
c30787_g1	GO:0006412	biological_process	translation
c31159_g1	GO:0055114	biological_process	oxidation-reduction process
c32540_g1	GO:0008283	biological_process	cell proliferation
c32540_g1	GO:0019915	biological_process	lipid storage
c32540_g1	GO:0030178	biological_process	negative regulation of Wnt signaling pathway
c32540_g1	GO:0022008	biological_process	neurogenesis
c32540_g1	GO:0016322	biological_process	neuron remodeling
c32540_g1	GO:0016567	biological_process	protein ubiquitination
c32540_g1	GO:0006508	biological_process	proteolysis
c32540_g1	GO:0007224	biological_process	smoothened signaling pathway
c33115_g1	GO:0030245	biological_process	cellulose catabolic process
c33115_g1	GO:0030245	biological_process	cellulose catabolic process
c33115_g1	GO:0030245	biological_process	cellulose catabolic process
c33184_g1	GO:0009737	biological_process	response to abscisic acid
c33353_g1	GO:0006412	biological_process	translation
c33900_g2	GO:0007275	biological_process	multicellular organismal development
c34057_g1	GO:0045454	biological_process	cell redox homeostasis
c34057_g1	GO:0006662	biological_process	glycerol ether metabolic process
c34236_g1	GO:0042742	biological_process	defense response to bacterium
c34236_g1	GO:0042832	biological_process	defense response to protozoan
c34236_g1	GO:0045087	biological_process	innate immune response
c34265_g1	GO:0000022	biological_process	mitotic spindle elongation
c34265_g1	GO:0007052	biological_process	mitotic spindle organization
c34265_g1	GO:0006412	biological_process	translation
c34469_g1	GO:0006412	biological_process	translation
c35345_g1	GO:0006778	biological_process	porphyrin-containing compound metabolic process
c35345_g1	GO:0009737	biological_process	response to abscisic acid
c35345_g1	GO:0006970	biological_process	response to osmotic stress
c35345_g1	GO:0009651	biological_process	response to salt stress
c35345_g1	GO:0006810	biological_process	transport
c35794_g1	GO:0001561	biological_process	fatty acid alpha-oxidation
c35794_g1	GO:0006720	biological_process	isoprenoid metabolic process
c35794_g1	GO:0097089	biological_process	methyl-branched fatty acid metabolic process
c35794_g1	GO:0001561	biological_process	fatty acid alpha-oxidation
c35794_g1	GO:0006720	biological_process	isoprenoid metabolic process
c35794_g1	GO:0097089	biological_process	methyl-branched fatty acid metabolic process
c35818_g1	GO:0007067	biological_process	mitotic nuclear division
c35818_g1	GO:0006376	biological_process	mRNA splice site selection
c35818_g1	GO:0000398	biological_process	mRNA splicing, via spliceosome
c35818_g1	GO:0000381	biological_process	regulation of alternative mRNA splicing, via spliceosome
c35818_g1	GO:0048024	biological_process	regulation of mRNA splicing, via spliceosome
c36006_g1	GO:0006631	biological_process	fatty acid metabolic process
c36012_g1	GO:0045297	biological_process	post-mating behavior
c36346_g1	GO:0072332	biological_process	intrinsic apoptotic signaling pathway by p53 class mediator
c36346_g1	GO:0009154	biological_process	purine ribonucleotide catabolic process
c36346_g1	GO:0006355	biological_process	regulation of transcription, DNA-templated
c36346_g1	GO:0006351	biological_process	transcription, DNA-templated
c36629_g1	GO:0006015	biological_process	5-phosphoribose 1-diphosphate biosynthetic process
c36629_g1	GO:0006167	biological_process	AMP biosynthetic process
c36629_g1	GO:0046101	biological_process	hypoxanthine biosynthetic process
c36629_g1	GO:0007399	biological_process	nervous system development
c36629_g1	GO:0009165	biological_process	nucleotide biosynthetic process
c36629_g1	GO:0031100	biological_process	organ regeneration
c36629_g1	GO:0019693	biological_process	ribose phosphate metabolic process
c36629_g1	GO:0034418	biological_process	urate biosynthetic process
c36633_g1	GO:0019303	biological_process	D-ribose catabolic process
c36809_g1	GO:0051297	biological_process	centrosome organization
c36809_g1	GO:0006396	biological_process	RNA processing
c36809_g1	GO:0006364	biological_process	rRNA processing
c36809_g1	GO:0008033	biological_process	tRNA processing
c37153_g1	GO:0045297	biological_process	post-mating behavior
c37566_g1	GO:0048354	biological_process	mucilage biosynthetic process involved in seed coat development
c37566_g1	GO:0010468	biological_process	regulation of gene expression
c37566_g1	GO:0010214	biological_process	seed coat development
c37566_g1	GO:0006351	biological_process	transcription, DNA-templated
c37566_g1	GO:0010090	biological_process	trichome morphogenesis
c37566_g1	GO:0048354	biological_process	mucilage biosynthetic process involved in seed coat development
c37566_g1	GO:0010468	biological_process	regulation of gene expression
c37566_g1	GO:0010214	biological_process	seed coat development
c37566_g1	GO:0006351	biological_process	transcription, DNA-templated
c37566_g1	GO:0010090	biological_process	trichome morphogenesis
c38101_g1	GO:0015986	biological_process	ATP synthesis coupled proton transport
c38101_g1	GO:0006909	biological_process	phagocytosis
c38357_g1	GO:0009790	biological_process	embryo development
c38357_g1	GO:0043066	biological_process	negative regulation of apoptotic process
c38357_g1	GO:0006355	biological_process	regulation of transcription, DNA-templated
c38357_g1	GO:0006351	biological_process	transcription, DNA-templated
c38357_g2	GO:0009790	biological_process	embryo development
c38357_g2	GO:0043066	biological_process	negative regulation of apoptotic process
c38357_g2	GO:0006355	biological_process	regulation of transcription, DNA-templated
c38357_g2	GO:0006351	biological_process	transcription, DNA-templated
c38397_g1	GO:0034219	biological_process	carbohydrate transmembrane transport
c38397_g1	GO:0015770	biological_process	sucrose transport
c38405_g1	GO:0016042	biological_process	lipid catabolic process
c38405_g2	GO:0016042	biological_process	lipid catabolic process
c38709_g1	GO:0070207	biological_process	protein homotrimerization
c39380_g1	GO:0008283	biological_process	cell proliferation
c39380_g1	GO:0007165	biological_process	signal transduction
c39936_g1	GO:0015986	biological_process	ATP synthesis coupled proton transport
c39989_g1	GO:0006120	biological_process	mitochondrial electron transport, NADH to ubiquinone
c39989_g1	GO:0042493	biological_process	response to drug
c40038_g1	GO:0009058	biological_process	biosynthetic process
c40257_g1	GO:0045110	biological_process	intermediate filament bundle assembly
c40638_g2	GO:0006412	biological_process	translation
c40667_g1	GO:0016559	biological_process	peroxisome fission
c40667_g1	GO:0044375	biological_process	regulation of peroxisome size
c40714_g1	GO:0000187	biological_process	activation of MAPK activity
c40714_g1	GO:0007568	biological_process	aging
c40714_g1	GO:0008089	biological_process	anterograde axon cargo transport
c40714_g1	GO:0060088	biological_process	auditory receptor cell stereocilium organization
c40714_g1	GO:0007569	biological_process	cell aging
c40714_g1	GO:0006879	biological_process	cellular iron ion homeostasis
c40714_g1	GO:0007566	biological_process	embryo implantation
c40714_g1	GO:0006749	biological_process	glutathione metabolic process
c40714_g1	GO:0060047	biological_process	heart contraction
c40714_g1	GO:0050665	biological_process	hydrogen peroxide biosynthetic process
c40714_g1	GO:0007626	biological_process	locomotory behavior
c40714_g1	GO:0046716	biological_process	muscle cell cellular homeostasis
c40714_g1	GO:0002262	biological_process	myeloid cell homeostasis
c40714_g1	GO:0043066	biological_process	negative regulation of apoptotic process
c40714_g1	GO:0045541	biological_process	negative regulation of cholesterol biosynthetic process
c40714_g1	GO:0043524	biological_process	negative regulation of neuron apoptotic process
c40714_g1	GO:0060052	biological_process	neurofilament cytoskeleton organization
c40714_g1	GO:0001541	biological_process	ovarian follicle development
c40714_g1	GO:0032287	biological_process	peripheral nervous system myelin maintenance
c40714_g1	GO:0043085	biological_process	positive regulation of catalytic activity
c40714_g1	GO:0001819	biological_process	positive regulation of cytokine production
c40714_g1	GO:1902177	biological_process	positive regulation of intrinsic apoptotic signaling pathway in response to oxidative stress
c40714_g1	GO:0032930	biological_process	positive regulation of superoxide anion generation
c40714_g1	GO:0072593	biological_process	reactive oxygen species metabolic process
c40714_g1	GO:0008217	biological_process	regulation of blood pressure
c40714_g1	GO:0051881	biological_process	regulation of mitochondrial membrane potential
c40714_g1	GO:0040014	biological_process	regulation of multicellular organism growth
c40714_g1	GO:0045859	biological_process	regulation of protein kinase activity
c40714_g1	GO:0032314	biological_process	regulation of Rac GTPase activity
c40714_g1	GO:0060087	biological_process	relaxation of vascular smooth muscle
c40714_g1	GO:0019430	biological_process	removal of superoxide radicals
c40714_g1	GO:0001975	biological_process	response to amphetamine
c40714_g1	GO:0048678	biological_process	response to axon injury
c40714_g1	GO:0046688	biological_process	response to copper ion
c40714_g1	GO:0042493	biological_process	response to drug
c40714_g1	GO:0045471	biological_process	response to ethanol
c40714_g1	GO:0009408	biological_process	response to heat
c40714_g1	GO:0042542	biological_process	response to hydrogen peroxide
c40714_g1	GO:0031667	biological_process	response to nutrient levels
c40714_g1	GO:0010033	biological_process	response to organic substance
c40714_g1	GO:0006979	biological_process	response to oxidative stress
c40714_g1	GO:0000302	biological_process	response to reactive oxygen species
c40714_g1	GO:0000303	biological_process	response to superoxide
c40714_g1	GO:0001895	biological_process	retina homeostasis
c40714_g1	GO:0008090	biological_process	retrograde axon cargo transport
c40714_g1	GO:0007605	biological_process	sensory perception of sound
c40714_g1	GO:0007283	biological_process	spermatogenesis
c40714_g1	GO:0042554	biological_process	superoxide anion generation
c40714_g1	GO:0006801	biological_process	superoxide metabolic process
c40714_g1	GO:0019226	biological_process	transmission of nerve impulse
c40714_g1	GO:0000187	biological_process	activation of MAPK activity
c40714_g1	GO:0007568	biological_process	aging
c40714_g1	GO:0008089	biological_process	anterograde axon cargo transport
c40714_g1	GO:0060088	biological_process	auditory receptor cell stereocilium organization
c40714_g1	GO:0007569	biological_process	cell aging
c40714_g1	GO:0006879	biological_process	cellular iron ion homeostasis
c40714_g1	GO:0007566	biological_process	embryo implantation
c40714_g1	GO:0006749	biological_process	glutathione metabolic process
c40714_g1	GO:0060047	biological_process	heart contraction
c40714_g1	GO:0050665	biological_process	hydrogen peroxide biosynthetic process
c40714_g1	GO:0007626	biological_process	locomotory behavior
c40714_g1	GO:0046716	biological_process	muscle cell cellular homeostasis
c40714_g1	GO:0002262	biological_process	myeloid cell homeostasis
c40714_g1	GO:0043066	biological_process	negative regulation of apoptotic process
c40714_g1	GO:0045541	biological_process	negative regulation of cholesterol biosynthetic process
c40714_g1	GO:0043524	biological_process	negative regulation of neuron apoptotic process
c40714_g1	GO:0060052	biological_process	neurofilament cytoskeleton organization
c40714_g1	GO:0001541	biological_process	ovarian follicle development
c40714_g1	GO:0032287	biological_process	peripheral nervous system myelin maintenance
c40714_g1	GO:0043085	biological_process	positive regulation of catalytic activity
c40714_g1	GO:0001819	biological_process	positive regulation of cytokine production
c40714_g1	GO:1902177	biological_process	positive regulation of intrinsic apoptotic signaling pathway in response to oxidative stress
c40714_g1	GO:0032930	biological_process	positive regulation of superoxide anion generation
c40714_g1	GO:0072593	biological_process	reactive oxygen species metabolic process
c40714_g1	GO:0008217	biological_process	regulation of blood pressure
c40714_g1	GO:0051881	biological_process	regulation of mitochondrial membrane potential
c40714_g1	GO:0040014	biological_process	regulation of multicellular organism growth
c40714_g1	GO:0045859	biological_process	regulation of protein kinase activity
c40714_g1	GO:0032314	biological_process	regulation of Rac GTPase activity
c40714_g1	GO:0060087	biological_process	relaxation of vascular smooth muscle
c40714_g1	GO:0019430	biological_process	removal of superoxide radicals
c40714_g1	GO:0001975	biological_process	response to amphetamine
c40714_g1	GO:0048678	biological_process	response to axon injury
c40714_g1	GO:0046688	biological_process	response to copper ion
c40714_g1	GO:0042493	biological_process	response to drug
c40714_g1	GO:0045471	biological_process	response to ethanol
c40714_g1	GO:0009408	biological_process	response to heat
c40714_g1	GO:0042542	biological_process	response to hydrogen peroxide
c40714_g1	GO:0031667	biological_process	response to nutrient levels
c40714_g1	GO:0010033	biological_process	response to organic substance
c40714_g1	GO:0006979	biological_process	response to oxidative stress
c40714_g1	GO:0000302	biological_process	response to reactive oxygen species
c40714_g1	GO:0000303	biological_process	response to superoxide
c40714_g1	GO:0001895	biological_process	retina homeostasis
c40714_g1	GO:0008090	biological_process	retrograde axon cargo transport
c40714_g1	GO:0007605	biological_process	sensory perception of sound
c40714_g1	GO:0007283	biological_process	spermatogenesis
c40714_g1	GO:0042554	biological_process	superoxide anion generation
c40714_g1	GO:0006801	biological_process	superoxide metabolic process
c40714_g1	GO:0019226	biological_process	transmission of nerve impulse
c40743_g1	GO:0016998	biological_process	cell wall macromolecule catabolic process
c40743_g1	GO:0019835	biological_process	cytolysis
c40743_g1	GO:0042742	biological_process	defense response to bacterium
c40743_g1	GO:0042742	biological_process	defense response to bacterium
c40743_g1	GO:0042832	biological_process	defense response to protozoan
c40743_g1	GO:0045087	biological_process	innate immune response
c40987_g1	GO:0001745	biological_process	compound eye morphogenesis
c40987_g1	GO:0048526	biological_process	imaginal disc-derived wing expansion
c40987_g1	GO:0006891	biological_process	intra-Golgi vesicle-mediated transport
c40987_g1	GO:0006886	biological_process	intracellular protein transport
c40987_g1	GO:0000281	biological_process	mitotic cytokinesis
c40987_g1	GO:0007274	biological_process	neuromuscular synaptic transmission
c40987_g1	GO:0048812	biological_process	neuron projection morphogenesis
c40987_g1	GO:0007269	biological_process	neurotransmitter secretion
c40987_g1	GO:0006909	biological_process	phagocytosis
c40987_g1	GO:0035540	biological_process	positive regulation of SNARE complex disassembly
c40987_g1	GO:0007268	biological_process	synaptic transmission
c40987_g1	GO:0031629	biological_process	synaptic vesicle fusion to presynaptic membrane
c40987_g1	GO:0016082	biological_process	synaptic vesicle priming
c41306_g1	GO:0010231	biological_process	maintenance of seed dormancy
c41306_g1	GO:0009269	biological_process	response to desiccation
c41458_g1	GO:0008089	biological_process	anterograde axon cargo transport
c41458_g1	GO:0019896	biological_process	axon transport of mitochondrion
c41458_g1	GO:0007010	biological_process	cytoskeleton organization
c41458_g1	GO:0007067	biological_process	mitotic nuclear division
c41458_g1	GO:0008090	biological_process	retrograde axon cargo transport
c41465_g1	GO:0042256	biological_process	mature ribosome assembly
c41465_g1	GO:0042273	biological_process	ribosomal large subunit biogenesis
c41465_g1	GO:0006413	biological_process	translational initiation
c41603_g1	GO:0006378	biological_process	mRNA polyadenylation
c41603_g1	GO:0006378	biological_process	mRNA polyadenylation
c41603_g1	GO:0000398	biological_process	mRNA splicing, via spliceosome
c41603_g1	GO:0022008	biological_process	neurogenesis
c41603_g1	GO:0000289	biological_process	nuclear-transcribed mRNA poly(A) tail shortening
c41603_g1	GO:0006378	biological_process	mRNA polyadenylation
c41603_g1	GO:0000398	biological_process	mRNA splicing, via spliceosome
c41603_g1	GO:0022008	biological_process	neurogenesis
c41603_g1	GO:0000289	biological_process	nuclear-transcribed mRNA poly(A) tail shortening
c41847_g1	GO:0046677	biological_process	response to antibiotic
c41931_g1	GO:0009615	biological_process	response to virus
c41941_g1	GO:0051298	biological_process	centrosome duplication
c41941_g1	GO:0051297	biological_process	centrosome organization
c41941_g1	GO:0000022	biological_process	mitotic spindle elongation
c41941_g1	GO:0007052	biological_process	mitotic spindle organization
c41941_g1	GO:0042254	biological_process	ribosome biogenesis
c41997_g1	GO:0097308	biological_process	cellular response to farnesol
c41997_g1	GO:0018208	biological_process	peptidyl-proline modification
c41997_g1	GO:0006457	biological_process	protein folding
c41997_g1	GO:0000413	biological_process	protein peptidyl-prolyl isomerization
c42091_g1	GO:0006412	biological_process	translation
c42136_g1	GO:0001667	biological_process	ameboidal cell migration
c42136_g1	GO:0034508	biological_process	centromere complex assembly
c42136_g1	GO:0031508	biological_process	centromeric heterochromatin assembly
c42136_g1	GO:0007067	biological_process	mitotic nuclear division
c42136_g1	GO:0032467	biological_process	positive regulation of cytokinesis
c42136_g1	GO:0033044	biological_process	regulation of chromosome organization
c42200_g1	GO:0015992	biological_process	proton transport
c42307_g1	GO:0048255	biological_process	mRNA stabilization
c42307_g1	GO:0051100	biological_process	negative regulation of binding
c42307_g1	GO:0017148	biological_process	negative regulation of translation
c42307_g1	GO:0048477	biological_process	oogenesis
c42307_g1	GO:0006355	biological_process	regulation of transcription, DNA-templated
c42307_g1	GO:0007286	biological_process	spermatid development
c42342_g1	GO:0009953	biological_process	dorsal/ventral pattern formation
c42342_g1	GO:0006810	biological_process	transport
c42469_g1	GO:0035690	biological_process	cellular response to drug
c42469_g1	GO:0071286	biological_process	cellular response to magnesium ion
c42469_g1	GO:0016311	biological_process	dephosphorylation
c42469_g1	GO:0006002	biological_process	fructose 6-phosphate metabolic process
c42469_g1	GO:0006094	biological_process	gluconeogenesis
c42469_g1	GO:0030308	biological_process	negative regulation of cell growth
c42469_g1	GO:0045820	biological_process	negative regulation of glycolytic process
c42469_g1	GO:0046580	biological_process	negative regulation of Ras protein signal transduction
c42469_g1	GO:0051289	biological_process	protein homotetramerization
c42469_g1	GO:0006111	biological_process	regulation of gluconeogenesis
c42554_g1	GO:0002181	biological_process	cytoplasmic translation
c42554_g1	GO:0006412	biological_process	translation
c42572_g1	GO:0006412	biological_process	translation
c42666_g1	GO:0006123	biological_process	mitochondrial electron transport, cytochrome c to oxygen
c43281_g1	GO:0006950	biological_process	response to stress
c43355_g1	GO:0042254	biological_process	ribosome biogenesis
c43355_g1	GO:0006414	biological_process	translational elongation
c43398_g1	GO:0006952	biological_process	defense response
c43398_g1	GO:0009607	biological_process	response to biotic stimulus
c43777_g1	GO:0006869	biological_process	lipid transport
c43833_g1	GO:0045454	biological_process	cell redox homeostasis
c44013_g1	GO:0006355	biological_process	regulation of transcription, DNA-templated
c44013_g1	GO:0006351	biological_process	transcription, DNA-templated
c44230_g1	GO:0006915	biological_process	apoptotic process
c44230_g1	GO:0055085	biological_process	transmembrane transport
c44230_g1	GO:0006915	biological_process	apoptotic process
c44230_g1	GO:0055085	biological_process	transmembrane transport
c44273_g1	GO:0008643	biological_process	carbohydrate transport
c44323_g1	GO:0007166	biological_process	cell surface receptor signaling pathway
c44323_g1	GO:0009972	biological_process	cytidine deamination
c44323_g1	GO:0019858	biological_process	cytosine metabolic process
c44323_g1	GO:0030308	biological_process	negative regulation of cell growth
c44323_g1	GO:0045980	biological_process	negative regulation of nucleotide metabolic process
c44323_g1	GO:0055086	biological_process	nucleobase-containing small molecule metabolic process
c44323_g1	GO:0051289	biological_process	protein homotetramerization
c44323_g1	GO:0006206	biological_process	pyrimidine nucleobase metabolic process
c44323_g1	GO:0043097	biological_process	pyrimidine nucleoside salvage
c44323_g1	GO:0008655	biological_process	pyrimidine-containing compound salvage
c44323_g1	GO:0044281	biological_process	small molecule metabolic process
c44358_g1	GO:0019730	biological_process	antimicrobial humoral response
c44358_g1	GO:0000398	biological_process	mRNA splicing, via spliceosome
c44358_g1	GO:0022008	biological_process	neurogenesis
c44358_g1	GO:0000381	biological_process	regulation of alternative mRNA splicing, via spliceosome
c44358_g1	GO:0006417	biological_process	regulation of translation
c44358_g1	GO:0016246	biological_process	RNA interference
c44358_g1	GO:0019730	biological_process	antimicrobial humoral response
c44358_g1	GO:0000398	biological_process	mRNA splicing, via spliceosome
c44358_g1	GO:0022008	biological_process	neurogenesis
c44358_g1	GO:0000381	biological_process	regulation of alternative mRNA splicing, via spliceosome
c44358_g1	GO:0006417	biological_process	regulation of translation
c44358_g1	GO:0016246	biological_process	RNA interference
c44413_g1	GO:0045493	biological_process	xylan catabolic process
c44485_g1	GO:0019933	biological_process	cAMP-mediated signaling
c44485_g1	GO:0008286	biological_process	insulin receptor signaling pathway
c44485_g1	GO:0045947	biological_process	negative regulation of translational initiation
c44485_g1	GO:0006446	biological_process	regulation of translational initiation
c44540_g1	GO:0000022	biological_process	mitotic spindle elongation
c44540_g1	GO:0007052	biological_process	mitotic spindle organization
c44540_g1	GO:0006412	biological_process	translation
c44658_g1	GO:0001731	biological_process	formation of translation preinitiation complex
c44670_g1	GO:0006355	biological_process	regulation of transcription, DNA-templated
c44670_g1	GO:0006351	biological_process	transcription, DNA-templated
c44670_g1	GO:0006355	biological_process	regulation of transcription, DNA-templated
c44670_g1	GO:0006351	biological_process	transcription, DNA-templated
c44670_g1	GO:0006355	biological_process	regulation of transcription, DNA-templated
c44670_g1	GO:0006351	biological_process	transcription, DNA-templated
c44670_g1	GO:0006355	biological_process	regulation of transcription, DNA-templated
c44670_g1	GO:0006351	biological_process	transcription, DNA-templated
c44687_g1	GO:0034314	biological_process	Arp2/3 complex-mediated actin nucleation
c44853_g1	GO:0002181	biological_process	cytoplasmic translation
c44853_g1	GO:0000027	biological_process	ribosomal large subunit assembly
c44853_g1	GO:0006412	biological_process	translation
c44853_g1	GO:0002181	biological_process	cytoplasmic translation
c44853_g1	GO:0000027	biological_process	ribosomal large subunit assembly
c44853_g1	GO:0006412	biological_process	translation
c44853_g1	GO:0002181	biological_process	cytoplasmic translation
c44853_g1	GO:0000027	biological_process	ribosomal large subunit assembly
c44853_g1	GO:0006412	biological_process	translation
c44891_g1	GO:0007049	biological_process	cell cycle
c44891_g1	GO:0030154	biological_process	cell differentiation
c44891_g1	GO:0045600	biological_process	positive regulation of fat cell differentiation
c44891_g1	GO:0046326	biological_process	positive regulation of glucose import
c44891_g1	GO:0046889	biological_process	positive regulation of lipid biosynthetic process
c44891_g1	GO:0033138	biological_process	positive regulation of peptidyl-serine phosphorylation
c44891_g1	GO:0045893	biological_process	positive regulation of transcription, DNA-templated
c44891_g1	GO:0050821	biological_process	protein stabilization
c44891_g1	GO:0007165	biological_process	signal transduction
c44891_g1	GO:0006351	biological_process	transcription, DNA-templated
c44902_g1	GO:0006605	biological_process	protein targeting
c45040_g1	GO:0055114	biological_process	oxidation-reduction process
c45040_g1	GO:0006979	biological_process	response to oxidative stress
c45097_g1	GO:0015991	biological_process	ATP hydrolysis coupled proton transport
c45235_g1	GO:0042742	biological_process	defense response to bacterium
c45235_g1	GO:0045892	biological_process	negative regulation of transcription, DNA-templated
c45235_g1	GO:0010112	biological_process	regulation of systemic acquired resistance
c45319_g1	GO:0030497	biological_process	fatty acid elongation
c45345_g1	GO:0045087	biological_process	innate immune response
c45345_g1	GO:0009253	biological_process	peptidoglycan catabolic process
c45640_g1	GO:0006103	biological_process	2-oxoglutarate metabolic process
c45640_g1	GO:0006531	biological_process	aspartate metabolic process
c45640_g1	GO:0009058	biological_process	biosynthetic process
c45640_g1	GO:0006536	biological_process	glutamate metabolic process
c45640_g1	GO:0006869	biological_process	lipid transport
c45725_g1	GO:0006957	biological_process	complement activation, alternative pathway
c45725_g1	GO:0043010	biological_process	camera-type eye development
c45725_g1	GO:0006508	biological_process	proteolysis
c45764_g1	GO:0016199	biological_process	axon midline choice point recognition
c45764_g1	GO:0048149	biological_process	behavioral response to ethanol
c45764_g1	GO:0007616	biological_process	long-term memory
c45764_g1	GO:0017148	biological_process	negative regulation of translation
c45764_g1	GO:0048477	biological_process	oogenesis
c45764_g1	GO:0051491	biological_process	positive regulation of filopodium assembly
c45947_g1	GO:0060561	biological_process	apoptotic process involved in morphogenesis
c45947_g1	GO:0071480	biological_process	cellular response to gamma radiation
c45947_g1	GO:0002088	biological_process	lens development in camera-type eye
c45947_g1	GO:0007517	biological_process	muscle organ development
c45947_g1	GO:0043066	biological_process	negative regulation of apoptotic process
c45947_g1	GO:0043154	biological_process	negative regulation of cysteine-type endopeptidase activity involved in apoptotic process
c45947_g1	GO:0010629	biological_process	negative regulation of gene expression
c45947_g1	GO:0032387	biological_process	negative regulation of intracellular transport
c45947_g1	GO:0051260	biological_process	protein homooligomerization
c45947_g1	GO:0042542	biological_process	response to hydrogen peroxide
c45947_g1	GO:0001666	biological_process	response to hypoxia
c45947_g1	GO:0007021	biological_process	tubulin complex assembly
c45949_g1	GO:0048749	biological_process	compound eye development
c45949_g1	GO:0016197	biological_process	endosomal transport
c45949_g1	GO:0007269	biological_process	neurotransmitter secretion
c45949_g1	GO:0006471	biological_process	protein ADP-ribosylation
c45949_g1	GO:0015031	biological_process	protein transport
c45949_g1	GO:0007264	biological_process	small GTPase mediated signal transduction
c45949_g1	GO:0048488	biological_process	synaptic vesicle endocytosis
c46106_g1	GO:0042048	biological_process	olfactory behavior
c46106_g1	GO:0019236	biological_process	response to pheromone
c46106_g1	GO:0007606	biological_process	sensory perception of chemical stimulus
c46106_g1	GO:0007608	biological_process	sensory perception of smell
c46106_g1	GO:0006810	biological_process	transport
c46128_g2	GO:0045453	biological_process	bone resorption
c46128_g2	GO:0007399	biological_process	nervous system development
c46128_g2	GO:0043171	biological_process	peptide catabolic process
c46128_g2	GO:0006508	biological_process	proteolysis
c46136_g1	GO:0006412	biological_process	translation
c46166_g1	GO:0006334	biological_process	nucleosome assembly
c46166_g1	GO:0006334	biological_process	nucleosome assembly
c46173_g1	GO:0006412	biological_process	translation
c46239_g1	GO:0006457	biological_process	protein folding
c46290_g1	GO:0045787	biological_process	positive regulation of cell cycle
c46327_g1	GO:0008069	biological_process	dorsal/ventral axis specification, ovarian follicular epithelium
c46327_g1	GO:0009953	biological_process	dorsal/ventral pattern formation
c46327_g1	GO:0007293	biological_process	germarium-derived egg chamber formation
c46327_g1	GO:0008298	biological_process	intracellular mRNA localization
c46327_g1	GO:0006406	biological_process	mRNA export from nucleus
c46327_g1	GO:0000398	biological_process	mRNA splicing, via spliceosome
c46327_g1	GO:0033119	biological_process	negative regulation of RNA splicing
c46327_g1	GO:0017148	biological_process	negative regulation of translation
c46327_g1	GO:0000184	biological_process	nuclear-transcribed mRNA catabolic process, nonsense-mediated decay
c46327_g1	GO:0007314	biological_process	oocyte anterior/posterior axis specification
c46327_g1	GO:0030720	biological_process	oocyte localization involved in germarium-derived egg chamber formation
c46327_g1	GO:0016325	biological_process	oocyte microtubule cytoskeleton organization
c46327_g1	GO:0048477	biological_process	oogenesis
c46327_g1	GO:0007297	biological_process	ovarian follicle cell migration
c46327_g1	GO:0019094	biological_process	pole plasm mRNA localization
c46327_g1	GO:0045451	biological_process	pole plasm oskar mRNA localization
c46327_g1	GO:0000381	biological_process	regulation of alternative mRNA splicing, via spliceosome
c46327_g1	GO:0006405	biological_process	RNA export from nucleus
c46403_g1	GO:0006412	biological_process	translation
c46509_g1	GO:0007586	biological_process	digestion
c46556_g1	GO:0016226	biological_process	iron-sulfur cluster assembly
c46652_g1	GO:0006412	biological_process	translation
c46652_g1	GO:0006412	biological_process	translation
c46734_g1	GO:0007596	biological_process	blood coagulation
c46734_g1	GO:0006401	biological_process	RNA catabolic process
c46734_g1	GO:0006396	biological_process	RNA processing
c46734_g1	GO:0006412	biological_process	translation
c46737_g2	GO:0051276	biological_process	chromosome organization
c46737_g2	GO:0001745	biological_process	compound eye morphogenesis
c46737_g2	GO:0001751	biological_process	compound eye photoreceptor cell differentiation
c46737_g2	GO:0008054	biological_process	cyclin catabolic process
c46737_g2	GO:0048132	biological_process	female germ-line stem cell division
c46737_g2	GO:0030718	biological_process	germ-line stem cell maintenance
c46737_g2	GO:0007140	biological_process	male meiosis
c46737_g2	GO:0007067	biological_process	mitotic nuclear division
c46737_g2	GO:0022008	biological_process	neurogenesis
c46737_g2	GO:0016322	biological_process	neuron remodeling
c46737_g2	GO:0048477	biological_process	oogenesis
c46737_g2	GO:0016567	biological_process	protein ubiquitination
c46737_g2	GO:0031647	biological_process	regulation of protein stability
c46737_g2	GO:0045676	biological_process	regulation of R7 cell differentiation
c46737_g2	GO:0007286	biological_process	spermatid development
c46737_g2	GO:0006511	biological_process	ubiquitin-dependent protein catabolic process
c46770_g1	GO:0006414	biological_process	translational elongation
c46815_g1	GO:0006508	biological_process	proteolysis
c46892_g1	GO:0009631	biological_process	cold acclimation
c46892_g1	GO:0050832	biological_process	defense response to fungus
c46892_g1	GO:0009737	biological_process	response to abscisic acid
c46892_g1	GO:0009409	biological_process	response to cold
c46892_g1	GO:0009414	biological_process	response to water deprivation
c46963_g1	GO:0030036	biological_process	actin cytoskeleton organization
c46963_g1	GO:0031532	biological_process	actin cytoskeleton reorganization
c46963_g1	GO:0070252	biological_process	actin-mediated cell contraction
c46963_g1	GO:0060271	biological_process	cilium morphogenesis
c46963_g1	GO:0007163	biological_process	establishment or maintenance of cell polarity
c46963_g1	GO:0034113	biological_process	heterotypic cell-cell adhesion
c46963_g1	GO:0003148	biological_process	outflow tract septum morphogenesis
c46963_g1	GO:0051291	biological_process	protein heterooligomerization
c46963_g1	GO:0008360	biological_process	regulation of cell shape
c46963_g1	GO:0071670	biological_process	smooth muscle cell chemotaxis
c46963_g1	GO:0002040	biological_process	sprouting angiogenesis
c46963_g1	GO:0034446	biological_process	substrate adhesion-dependent cell spreading
c47063_g1	GO:0006979	biological_process	response to oxidative stress
c47100_g1	GO:0042273	biological_process	ribosomal large subunit biogenesis
c47100_g1	GO:0006364	biological_process	rRNA processing
c47100_g1	GO:0006412	biological_process	translation
c47152_g1	GO:0015031	biological_process	protein transport
c47195_g1	GO:0042254	biological_process	ribosome biogenesis
c47293_g1	GO:0051603	biological_process	proteolysis involved in cellular protein catabolic process
c47355_g1	GO:0006241	biological_process	CTP biosynthetic process
c47355_g1	GO:0006183	biological_process	GTP biosynthetic process
c47355_g1	GO:0006228	biological_process	UTP biosynthetic process
c47355_g1	GO:0030154	biological_process	cell differentiation
c47355_g1	GO:0006241	biological_process	CTP biosynthetic process
c47355_g1	GO:0006897	biological_process	endocytosis
c47355_g1	GO:0006183	biological_process	GTP biosynthetic process
c47355_g1	GO:0007399	biological_process	nervous system development
c47355_g1	GO:0006228	biological_process	UTP biosynthetic process
c47355_g1	GO:0030154	biological_process	cell differentiation
c47355_g1	GO:0006241	biological_process	CTP biosynthetic process
c47355_g1	GO:0006897	biological_process	endocytosis
c47355_g1	GO:0006183	biological_process	GTP biosynthetic process
c47355_g1	GO:0007399	biological_process	nervous system development
c47355_g1	GO:0006228	biological_process	UTP biosynthetic process
c47387_g1	GO:0006121	biological_process	mitochondrial electron transport, succinate to ubiquinone
c47387_g1	GO:0006099	biological_process	tricarboxylic acid cycle
c47389_g1	GO:0006068	biological_process	ethanol catabolic process
c47549_g1	GO:0006950	biological_process	response to stress
c47549_g1	GO:0006950	biological_process	response to stress
c47617_g1	GO:0048738	biological_process	cardiac muscle tissue development
c47617_g1	GO:0060047	biological_process	heart contraction
c47617_g1	GO:0007507	biological_process	heart development
c47617_g1	GO:0046716	biological_process	muscle cell cellular homeostasis
c47617_g1	GO:0007517	biological_process	muscle organ development
c47617_g1	GO:0030239	biological_process	myofibril assembly
c47617_g1	GO:0007399	biological_process	nervous system development
c47617_g1	GO:0000280	biological_process	nuclear division
c47617_g1	GO:0045214	biological_process	sarcomere organization
c47617_g1	GO:0007519	biological_process	skeletal muscle tissue development
c47617_g1	GO:0048738	biological_process	cardiac muscle tissue development
c47617_g1	GO:0060047	biological_process	heart contraction
c47617_g1	GO:0007507	biological_process	heart development
c47617_g1	GO:0046716	biological_process	muscle cell cellular homeostasis
c47617_g1	GO:0007517	biological_process	muscle organ development
c47617_g1	GO:0030239	biological_process	myofibril assembly
c47617_g1	GO:0007399	biological_process	nervous system development
c47617_g1	GO:0000280	biological_process	nuclear division
c47617_g1	GO:0045214	biological_process	sarcomere organization
c47617_g1	GO:0007519	biological_process	skeletal muscle tissue development
c47618_g1	GO:0046007	biological_process	negative regulation of activated T cell proliferation
c47618_g1	GO:0043066	biological_process	negative regulation of apoptotic process
c47618_g1	GO:0070885	biological_process	negative regulation of calcineurin-NFAT signaling cascade
c47618_g1	GO:0032689	biological_process	negative regulation of interferon-gamma production
c47618_g1	GO:0032700	biological_process	negative regulation of interleukin-17 production
c47618_g1	GO:0032703	biological_process	negative regulation of interleukin-2 production
c47618_g1	GO:0001933	biological_process	negative regulation of protein phosphorylation
c47618_g1	GO:0043433	biological_process	negative regulation of sequence-specific DNA binding transcription factor activity
c47618_g1	GO:0050860	biological_process	negative regulation of T cell receptor signaling pathway
c47618_g1	GO:0051260	biological_process	protein homooligomerization
c47618_g1	GO:0006979	biological_process	response to oxidative stress
c47642_g1	GO:0097190	biological_process	apoptotic signaling pathway
c47642_g1	GO:0097191	biological_process	extrinsic apoptotic signaling pathway
c47642_g1	GO:0030308	biological_process	negative regulation of cell growth
c47642_g1	GO:0045892	biological_process	negative regulation of transcription, DNA-templated
c47663_g1	GO:0045727	biological_process	positive regulation of translation
c47663_g1	GO:0006364	biological_process	rRNA processing
c47663_g1	GO:0008033	biological_process	tRNA processing
c47693_g1	GO:0007126	biological_process	meiotic nuclear division
c47693_g1	GO:0042254	biological_process	ribosome biogenesis
c47693_g1	GO:0000723	biological_process	telomere maintenance
c47708_g1	GO:0031116	biological_process	positive regulation of microtubule polymerization
c47708_g1	GO:0031116	biological_process	positive regulation of microtubule polymerization
c47815_g1	GO:0033344	biological_process	cholesterol efflux
c47815_g1	GO:0042632	biological_process	cholesterol homeostasis
c47815_g1	GO:0008203	biological_process	cholesterol metabolic process
c47815_g1	GO:0030301	biological_process	cholesterol transport
c47815_g1	GO:0032367	biological_process	intracellular cholesterol transport
c47815_g1	GO:0009615	biological_process	response to virus
c47935_g1	GO:0015031	biological_process	protein transport
c47938_g1	GO:0022904	biological_process	respiratory electron transport chain
c47994_g1	GO:0006874	biological_process	cellular calcium ion homeostasis
c47994_g1	GO:0032472	biological_process	Golgi calcium ion transport
c47994_g1	GO:0006487	biological_process	protein N-linked glycosylation
c47994_g1	GO:0035751	biological_process	regulation of lysosomal lumen pH
c48109_g1	GO:0006032	biological_process	chitin catabolic process
c48109_g1	GO:0000272	biological_process	polysaccharide catabolic process
c48157_g1	GO:0006919	biological_process	activation of cysteine-type endopeptidase activity involved in apoptotic process
c48157_g1	GO:0001525	biological_process	angiogenesis
c48157_g1	GO:0006915	biological_process	apoptotic process
c48157_g1	GO:0034605	biological_process	cellular response to heat
c48157_g1	GO:0006886	biological_process	intracellular protein transport
c48157_g1	GO:0051898	biological_process	negative regulation of protein kinase B signaling
c48157_g1	GO:0032007	biological_process	negative regulation of TOR signaling
c48157_g1	GO:0030948	biological_process	negative regulation of vascular endothelial growth factor receptor signaling pathway
c48157_g1	GO:0045766	biological_process	positive regulation of angiogenesis
c48157_g1	GO:0010595	biological_process	positive regulation of endothelial cell migration
c48157_g1	GO:0001938	biological_process	positive regulation of endothelial cell proliferation
c48157_g1	GO:0006508	biological_process	proteolysis
c48157_g1	GO:0051592	biological_process	response to calcium ion
c48157_g1	GO:0036324	biological_process	vascular endothelial growth factor receptor-2 signaling pathway
c48162_g1	GO:0016567	biological_process	protein ubiquitination
c48162_g1	GO:0031146	biological_process	SCF-dependent proteasomal ubiquitin-dependent protein catabolic process
c48162_g1	GO:0016567	biological_process	protein ubiquitination
c48162_g1	GO:0031146	biological_process	SCF-dependent proteasomal ubiquitin-dependent protein catabolic process
c48170_g1	GO:0006950	biological_process	response to stress
c48176_g1	GO:0051298	biological_process	centrosome duplication
c48176_g1	GO:0000022	biological_process	mitotic spindle elongation
c48176_g1	GO:0007052	biological_process	mitotic spindle organization
c48176_g1	GO:0006412	biological_process	translation
c48176_g1	GO:0051298	biological_process	centrosome duplication
c48176_g1	GO:0000022	biological_process	mitotic spindle elongation
c48176_g1	GO:0007052	biological_process	mitotic spindle organization
c48176_g1	GO:0006412	biological_process	translation
c48209_g1	GO:0008219	biological_process	cell death
c48209_g1	GO:0071732	biological_process	cellular response to nitric oxide
c48209_g1	GO:0034614	biological_process	cellular response to reactive oxygen species
c48209_g1	GO:0071446	biological_process	cellular response to salicylic acid stimulus
c48209_g1	GO:0042742	biological_process	defense response to bacterium
c48209_g1	GO:0001561	biological_process	fatty acid alpha-oxidation
c48209_g1	GO:0006629	biological_process	lipid metabolic process
c48209_g1	GO:0031408	biological_process	oxylipin biosynthetic process
c48209_g1	GO:0009626	biological_process	plant-type hypersensitive response
c48209_g1	GO:0009737	biological_process	response to abscisic acid
c48209_g1	GO:0006979	biological_process	response to oxidative stress
c48209_g1	GO:0009751	biological_process	response to salicylic acid
c48209_g1	GO:0009627	biological_process	systemic acquired resistance
c48209_g1	GO:0008219	biological_process	cell death
c48209_g1	GO:0071732	biological_process	cellular response to nitric oxide
c48209_g1	GO:0034614	biological_process	cellular response to reactive oxygen species
c48209_g1	GO:0071446	biological_process	cellular response to salicylic acid stimulus
c48209_g1	GO:0042742	biological_process	defense response to bacterium
c48209_g1	GO:0001561	biological_process	fatty acid alpha-oxidation
c48209_g1	GO:0006629	biological_process	lipid metabolic process
c48209_g1	GO:0031408	biological_process	oxylipin biosynthetic process
c48209_g1	GO:0009626	biological_process	plant-type hypersensitive response
c48209_g1	GO:0009737	biological_process	response to abscisic acid
c48209_g1	GO:0006979	biological_process	response to oxidative stress
c48209_g1	GO:0009751	biological_process	response to salicylic acid
c48209_g1	GO:0009627	biological_process	systemic acquired resistance
c48209_g1	GO:0008219	biological_process	cell death
c48209_g1	GO:0071732	biological_process	cellular response to nitric oxide
c48209_g1	GO:0034614	biological_process	cellular response to reactive oxygen species
c48209_g1	GO:0071446	biological_process	cellular response to salicylic acid stimulus
c48209_g1	GO:0042742	biological_process	defense response to bacterium
c48209_g1	GO:0001561	biological_process	fatty acid alpha-oxidation
c48209_g1	GO:0006629	biological_process	lipid metabolic process
c48209_g1	GO:0031408	biological_process	oxylipin biosynthetic process
c48209_g1	GO:0009626	biological_process	plant-type hypersensitive response
c48209_g1	GO:0009737	biological_process	response to abscisic acid
c48209_g1	GO:0006979	biological_process	response to oxidative stress
c48209_g1	GO:0009751	biological_process	response to salicylic acid
c48209_g1	GO:0009627	biological_process	systemic acquired resistance
c48231_g1	GO:0006703	biological_process	estrogen biosynthetic process
c48231_g1	GO:0030198	biological_process	extracellular matrix organization
c48231_g1	GO:0006633	biological_process	fatty acid biosynthetic process
c48231_g1	GO:0010811	biological_process	positive regulation of cell-substrate adhesion
c48268_g1	GO:0019915	biological_process	lipid storage
c48268_g1	GO:0050826	biological_process	response to freezing
c48268_g1	GO:0009845	biological_process	seed germination
c48268_g1	GO:0010344	biological_process	seed oilbody biogenesis
c48281_g1	GO:0045454	biological_process	cell redox homeostasis
c48281_g1	GO:0009100	biological_process	glycoprotein metabolic process
c48281_g1	GO:0006457	biological_process	protein folding
c48281_g1	GO:0034976	biological_process	response to endoplasmic reticulum stress
c48281_g1	GO:0006986	biological_process	response to unfolded protein
c48360_g1	GO:0006397	biological_process	mRNA processing
c48360_g1	GO:0006355	biological_process	regulation of transcription, DNA-templated
c48360_g1	GO:0008380	biological_process	RNA splicing
c48360_g1	GO:0006351	biological_process	transcription, DNA-templated
c48372_g1	GO:0043248	biological_process	proteasome assembly
c48404_g1	GO:0007596	biological_process	blood coagulation
c48404_g1	GO:0034613	biological_process	cellular protein localization
c48404_g1	GO:0030168	biological_process	platelet activation
c48404_g1	GO:0002576	biological_process	platelet degranulation
c48404_g1	GO:2000680	biological_process	regulation of rubidium ion transport
c48520_g1	GO:0006412	biological_process	translation
c48520_g1	GO:0006412	biological_process	translation
c48651_g1	GO:0060749	biological_process	mammary gland alveolus development
c48651_g1	GO:0060744	biological_process	mammary gland branching involved in thelarche
c48651_g1	GO:0033147	biological_process	negative regulation of intracellular estrogen receptor signaling pathway
c48651_g1	GO:0033600	biological_process	negative regulation of mammary gland epithelial cell proliferation
c48651_g1	GO:0045892	biological_process	negative regulation of transcription, DNA-templated
c48651_g1	GO:0060762	biological_process	regulation of branching involved in mammary gland duct morphogenesis
c48651_g1	GO:0006351	biological_process	transcription, DNA-templated
c48666_g1	GO:0006457	biological_process	protein folding
c48669_g2	GO:0030855	biological_process	epithelial cell differentiation
c48669_g2	GO:0010633	biological_process	negative regulation of epithelial cell migration
c48669_g2	GO:0045785	biological_process	positive regulation of cell adhesion
c48669_g2	GO:0045807	biological_process	positive regulation of endocytosis
c48689_g1	GO:0006032	biological_process	chitin catabolic process
c48689_g1	GO:0000272	biological_process	polysaccharide catabolic process
c48698_g1	GO:0006412	biological_process	translation
c48698_g1	GO:0006412	biological_process	translation
c48811_g1	GO:0035220	biological_process	wing disc development
c48841_g1	GO:0030282	biological_process	bone mineralization
c48841_g1	GO:0016311	biological_process	dephosphorylation
c48841_g1	GO:0043647	biological_process	inositol phosphate metabolic process
c48841_g1	GO:0001503	biological_process	ossification
c48841_g1	GO:0006797	biological_process	polyphosphate metabolic process
c48841_g1	GO:0044281	biological_process	small molecule metabolic process
c48841_g1	GO:0030282	biological_process	bone mineralization
c48841_g1	GO:0016311	biological_process	dephosphorylation
c48841_g1	GO:0043647	biological_process	inositol phosphate metabolic process
c48841_g1	GO:0001503	biological_process	ossification
c48841_g1	GO:0006797	biological_process	polyphosphate metabolic process
c48841_g1	GO:0044281	biological_process	small molecule metabolic process
c48915_g1	GO:0007586	biological_process	digestion
c48917_g1	GO:0007154	biological_process	cell communication
c48957_g1	GO:0055114	biological_process	oxidation-reduction process
c48969_g1	GO:0006334	biological_process	nucleosome assembly
c49024_g1	GO:0045490	biological_process	pectin catabolic process
c49047_g1	GO:0015986	biological_process	ATP synthesis coupled proton transport
c49047_g1	GO:0015986	biological_process	ATP synthesis coupled proton transport
c49049_g1	GO:0046686	biological_process	response to cadmium ion
c49049_g1	GO:0009636	biological_process	response to toxic substance
c49049_g1	GO:0009414	biological_process	response to water deprivation
c49049_g1	GO:0009407	biological_process	toxin catabolic process
c49052_g1	GO:0006096	biological_process	glycolytic process
c49052_g1	GO:0006090	biological_process	pyruvate metabolic process
c49128_g1	GO:0006950	biological_process	response to stress
c49154_g1	GO:0009790	biological_process	embryo development
c49154_g1	GO:0009409	biological_process	response to cold
c49154_g1	GO:0006970	biological_process	response to osmotic stress
c49154_g1	GO:0009414	biological_process	response to water deprivation
c49154_g1	GO:0048316	biological_process	seed development
c49227_g1	GO:0006071	biological_process	glycerol metabolic process
c49227_g1	GO:0006629	biological_process	lipid metabolic process
c49238_g1	GO:0006950	biological_process	response to stress
c49271_g1	GO:0046294	biological_process	formaldehyde catabolic process
c49279_g1	GO:0007275	biological_process	multicellular organismal development
c49279_g1	GO:0006457	biological_process	protein folding
c49279_g1	GO:0009408	biological_process	response to heat
c49279_g1	GO:0007275	biological_process	multicellular organismal development
c49279_g1	GO:0006457	biological_process	protein folding
c49279_g1	GO:0009408	biological_process	response to heat
c49296_g1	GO:0007275	biological_process	multicellular organismal development
c49335_g1	GO:0006730	biological_process	one-carbon metabolic process
c49335_g1	GO:0006556	biological_process	S-adenosylmethionine biosynthetic process
c49390_g1	GO:0007596	biological_process	blood coagulation
c49390_g1	GO:0007598	biological_process	blood coagulation, extrinsic pathway
c49390_g1	GO:0007597	biological_process	blood coagulation, intrinsic pathway
c49390_g1	GO:0044267	biological_process	cellular protein metabolic process
c49390_g1	GO:0017187	biological_process	peptidyl-glutamic acid carboxylation
c49390_g1	GO:0030335	biological_process	positive regulation of cell migration
c49390_g1	GO:0051897	biological_process	positive regulation of protein kinase B signaling
c49390_g1	GO:0043687	biological_process	post-translational protein modification
c49390_g1	GO:0006508	biological_process	proteolysis
c49415_g1	GO:0048846	biological_process	axon extension involved in axon guidance
c49415_g1	GO:0007420	biological_process	brain development
c49415_g1	GO:0033563	biological_process	dorsal/ventral axon guidance
c49415_g1	GO:0040023	biological_process	establishment of nucleus localization
c49415_g1	GO:0008045	biological_process	motor neuron axon guidance
c49415_g1	GO:0050919	biological_process	negative chemotaxis
c49415_g1	GO:0048843	biological_process	negative regulation of axon extension involved in axon guidance
c49415_g1	GO:0051964	biological_process	negative regulation of synapse assembly
c49415_g1	GO:0031290	biological_process	retinal ganglion cell axon guidance
c49415_g1	GO:0021510	biological_process	spinal cord development
c49415_g1	GO:0022028	biological_process	tangential migration from the subventricular zone to the olfactory bulb
c49444_g1	GO:0030282	biological_process	bone mineralization
c49444_g1	GO:0016311	biological_process	dephosphorylation
c49444_g1	GO:0043647	biological_process	inositol phosphate metabolic process
c49444_g1	GO:0001503	biological_process	ossification
c49444_g1	GO:0006797	biological_process	polyphosphate metabolic process
c49444_g1	GO:0044281	biological_process	small molecule metabolic process
c49460_g1	GO:0006749	biological_process	glutathione metabolic process
c49464_g1	GO:2001059	biological_process	D-tagatose 6-phosphate catabolic process
c49464_g1	GO:0019404	biological_process	galactitol catabolic process
c49491_g1	GO:0000447	biological_process	endonucleolytic cleavage in ITS1 to separate SSU-rRNA from 5.8S rRNA and LSU-rRNA from tricistronic rRNA transcript (SSU-rRNA, 5.8S rRNA, LSU-rRNA)
c49491_g1	GO:0000461	biological_process	endonucleolytic cleavage to generate mature 3'-end of SSU-rRNA from (SSU-rRNA, 5.8S rRNA, LSU-rRNA)
c49491_g1	GO:0000028	biological_process	ribosomal small subunit assembly
c49491_g1	GO:0006407	biological_process	rRNA export from nucleus
c49491_g1	GO:0006412	biological_process	translation
c49539_g1	GO:0071711	biological_process	basement membrane organization
c49539_g1	GO:0007155	biological_process	cell adhesion
c49539_g1	GO:0007160	biological_process	cell-matrix adhesion
c49539_g1	GO:0030198	biological_process	extracellular matrix organization
c49553_g1	GO:0006412	biological_process	translation
c49585_g1	GO:0032502	biological_process	developmental process
c49585_g1	GO:0001892	biological_process	embryonic placenta development
c49585_g1	GO:0046909	biological_process	intermembrane transport
c49585_g1	GO:0051452	biological_process	intracellular pH reduction
c49585_g1	GO:0060548	biological_process	negative regulation of cell death
c49585_g1	GO:0090212	biological_process	negative regulation of establishment of blood-brain barrier
c49585_g1	GO:0007584	biological_process	response to nutrient
c49585_g1	GO:0009268	biological_process	response to pH
c49585_g1	GO:0009636	biological_process	response to toxic substance
c49585_g1	GO:0042360	biological_process	vitamin E metabolic process
c49585_g1	GO:0051180	biological_process	vitamin transport
c49601_g1	GO:0001731	biological_process	formation of translation preinitiation complex
c49601_g1	GO:0006446	biological_process	regulation of translational initiation
c49631_g1	GO:0001568	biological_process	blood vessel development
c49631_g1	GO:0001974	biological_process	blood vessel remodeling
c49631_g1	GO:0051216	biological_process	cartilage development
c49631_g1	GO:0006584	biological_process	catecholamine metabolic process
c49631_g1	GO:0006878	biological_process	cellular copper ion homeostasis
c49631_g1	GO:0021954	biological_process	central nervous system neuron development
c49631_g1	GO:0021702	biological_process	cerebellar Purkinje cell differentiation
c49631_g1	GO:0030199	biological_process	collagen fibril organization
c49631_g1	GO:0060003	biological_process	copper ion export
c49631_g1	GO:0015677	biological_process	copper ion import
c49631_g1	GO:0006825	biological_process	copper ion transport
c49631_g1	GO:0048813	biological_process	dendrite morphogenesis
c49631_g1	GO:0010273	biological_process	detoxification of copper ion
c49631_g1	GO:0042417	biological_process	dopamine metabolic process
c49631_g1	GO:0048251	biological_process	elastic fiber assembly
c49631_g1	GO:0051542	biological_process	elastin biosynthetic process
c49631_g1	GO:0042414	biological_process	epinephrine metabolic process
c49631_g1	GO:0030198	biological_process	extracellular matrix organization
c49631_g1	GO:0031069	biological_process	hair follicle morphogenesis
c49631_g1	GO:0001701	biological_process	in utero embryonic development
c49631_g1	GO:0034220	biological_process	ion transmembrane transport
c49631_g1	GO:0007595	biological_process	lactation
c49631_g1	GO:0007626	biological_process	locomotory behavior
c49631_g1	GO:0048286	biological_process	lung alveolus development
c49631_g1	GO:0007005	biological_process	mitochondrion organization
c49631_g1	GO:0048553	biological_process	negative regulation of metalloenzyme activity
c49631_g1	GO:0043524	biological_process	negative regulation of neuron apoptotic process
c49631_g1	GO:0048812	biological_process	neuron projection morphogenesis
c49631_g1	GO:0042421	biological_process	norepinephrine biosynthetic process
c49631_g1	GO:0042415	biological_process	norepinephrine metabolic process
c49631_g1	GO:0018205	biological_process	peptidyl-lysine modification
c49631_g1	GO:0043473	biological_process	pigmentation
c49631_g1	GO:0043085	biological_process	positive regulation of catalytic activity
c49631_g1	GO:0048554	biological_process	positive regulation of metalloenzyme activity
c49631_g1	GO:0051353	biological_process	positive regulation of oxidoreductase activity
c49631_g1	GO:0021860	biological_process	pyramidal neuron development
c49631_g1	GO:0010468	biological_process	regulation of gene expression
c49631_g1	GO:0002082	biological_process	regulation of oxidative phosphorylation
c49631_g1	GO:0001836	biological_process	release of cytochrome c from mitochondria
c49631_g1	GO:0019430	biological_process	removal of superoxide radicals
c49631_g1	GO:0010041	biological_process	response to iron(III) ion
c49631_g1	GO:0010043	biological_process	response to zinc ion
c49631_g1	GO:0042428	biological_process	serotonin metabolic process
c49631_g1	GO:0043588	biological_process	skin development
c49631_g1	GO:0042093	biological_process	T-helper cell differentiation
c49631_g1	GO:0055085	biological_process	transmembrane transport
c49631_g1	GO:0006568	biological_process	tryptophan metabolic process
c49631_g1	GO:0006570	biological_process	tyrosine metabolic process
c49631_g1	GO:0001568	biological_process	blood vessel development
c49631_g1	GO:0001974	biological_process	blood vessel remodeling
c49631_g1	GO:0051216	biological_process	cartilage development
c49631_g1	GO:0006584	biological_process	catecholamine metabolic process
c49631_g1	GO:0006878	biological_process	cellular copper ion homeostasis
c49631_g1	GO:0021954	biological_process	central nervous system neuron development
c49631_g1	GO:0021702	biological_process	cerebellar Purkinje cell differentiation
c49631_g1	GO:0030199	biological_process	collagen fibril organization
c49631_g1	GO:0060003	biological_process	copper ion export
c49631_g1	GO:0015677	biological_process	copper ion import
c49631_g1	GO:0006825	biological_process	copper ion transport
c49631_g1	GO:0048813	biological_process	dendrite morphogenesis
c49631_g1	GO:0010273	biological_process	detoxification of copper ion
c49631_g1	GO:0042417	biological_process	dopamine metabolic process
c49631_g1	GO:0048251	biological_process	elastic fiber assembly
c49631_g1	GO:0051542	biological_process	elastin biosynthetic process
c49631_g1	GO:0042414	biological_process	epinephrine metabolic process
c49631_g1	GO:0030198	biological_process	extracellular matrix organization
c49631_g1	GO:0031069	biological_process	hair follicle morphogenesis
c49631_g1	GO:0001701	biological_process	in utero embryonic development
c49631_g1	GO:0034220	biological_process	ion transmembrane transport
c49631_g1	GO:0007595	biological_process	lactation
c49631_g1	GO:0007626	biological_process	locomotory behavior
c49631_g1	GO:0048286	biological_process	lung alveolus development
c49631_g1	GO:0007005	biological_process	mitochondrion organization
c49631_g1	GO:0048553	biological_process	negative regulation of metalloenzyme activity
c49631_g1	GO:0043524	biological_process	negative regulation of neuron apoptotic process
c49631_g1	GO:0048812	biological_process	neuron projection morphogenesis
c49631_g1	GO:0042421	biological_process	norepinephrine biosynthetic process
c49631_g1	GO:0042415	biological_process	norepinephrine metabolic process
c49631_g1	GO:0018205	biological_process	peptidyl-lysine modification
c49631_g1	GO:0043473	biological_process	pigmentation
c49631_g1	GO:0043085	biological_process	positive regulation of catalytic activity
c49631_g1	GO:0048554	biological_process	positive regulation of metalloenzyme activity
c49631_g1	GO:0051353	biological_process	positive regulation of oxidoreductase activity
c49631_g1	GO:0021860	biological_process	pyramidal neuron development
c49631_g1	GO:0010468	biological_process	regulation of gene expression
c49631_g1	GO:0002082	biological_process	regulation of oxidative phosphorylation
c49631_g1	GO:0001836	biological_process	release of cytochrome c from mitochondria
c49631_g1	GO:0019430	biological_process	removal of superoxide radicals
c49631_g1	GO:0010041	biological_process	response to iron(III) ion
c49631_g1	GO:0010043	biological_process	response to zinc ion
c49631_g1	GO:0042428	biological_process	serotonin metabolic process
c49631_g1	GO:0043588	biological_process	skin development
c49631_g1	GO:0042093	biological_process	T-helper cell differentiation
c49631_g1	GO:0055085	biological_process	transmembrane transport
c49631_g1	GO:0006568	biological_process	tryptophan metabolic process
c49631_g1	GO:0006570	biological_process	tyrosine metabolic process
c49631_g1	GO:0001568	biological_process	blood vessel development
c49631_g1	GO:0001974	biological_process	blood vessel remodeling
c49631_g1	GO:0051216	biological_process	cartilage development
c49631_g1	GO:0006584	biological_process	catecholamine metabolic process
c49631_g1	GO:0006878	biological_process	cellular copper ion homeostasis
c49631_g1	GO:0021954	biological_process	central nervous system neuron development
c49631_g1	GO:0021702	biological_process	cerebellar Purkinje cell differentiation
c49631_g1	GO:0030199	biological_process	collagen fibril organization
c49631_g1	GO:0060003	biological_process	copper ion export
c49631_g1	GO:0015677	biological_process	copper ion import
c49631_g1	GO:0006825	biological_process	copper ion transport
c49631_g1	GO:0048813	biological_process	dendrite morphogenesis
c49631_g1	GO:0010273	biological_process	detoxification of copper ion
c49631_g1	GO:0042417	biological_process	dopamine metabolic process
c49631_g1	GO:0048251	biological_process	elastic fiber assembly
c49631_g1	GO:0051542	biological_process	elastin biosynthetic process
c49631_g1	GO:0042414	biological_process	epinephrine metabolic process
c49631_g1	GO:0030198	biological_process	extracellular matrix organization
c49631_g1	GO:0031069	biological_process	hair follicle morphogenesis
c49631_g1	GO:0001701	biological_process	in utero embryonic development
c49631_g1	GO:0034220	biological_process	ion transmembrane transport
c49631_g1	GO:0007595	biological_process	lactation
c49631_g1	GO:0007626	biological_process	locomotory behavior
c49631_g1	GO:0048286	biological_process	lung alveolus development
c49631_g1	GO:0007005	biological_process	mitochondrion organization
c49631_g1	GO:0048553	biological_process	negative regulation of metalloenzyme activity
c49631_g1	GO:0043524	biological_process	negative regulation of neuron apoptotic process
c49631_g1	GO:0048812	biological_process	neuron projection morphogenesis
c49631_g1	GO:0042421	biological_process	norepinephrine biosynthetic process
c49631_g1	GO:0042415	biological_process	norepinephrine metabolic process
c49631_g1	GO:0018205	biological_process	peptidyl-lysine modification
c49631_g1	GO:0043473	biological_process	pigmentation
c49631_g1	GO:0043085	biological_process	positive regulation of catalytic activity
c49631_g1	GO:0048554	biological_process	positive regulation of metalloenzyme activity
c49631_g1	GO:0051353	biological_process	positive regulation of oxidoreductase activity
c49631_g1	GO:0021860	biological_process	pyramidal neuron development
c49631_g1	GO:0010468	biological_process	regulation of gene expression
c49631_g1	GO:0002082	biological_process	regulation of oxidative phosphorylation
c49631_g1	GO:0001836	biological_process	release of cytochrome c from mitochondria
c49631_g1	GO:0019430	biological_process	removal of superoxide radicals
c49631_g1	GO:0010041	biological_process	response to iron(III) ion
c49631_g1	GO:0010043	biological_process	response to zinc ion
c49631_g1	GO:0042428	biological_process	serotonin metabolic process
c49631_g1	GO:0043588	biological_process	skin development
c49631_g1	GO:0042093	biological_process	T-helper cell differentiation
c49631_g1	GO:0055085	biological_process	transmembrane transport
c49631_g1	GO:0006568	biological_process	tryptophan metabolic process
c49631_g1	GO:0006570	biological_process	tyrosine metabolic process
c49697_g1	GO:0006914	biological_process	autophagy
c49733_g1	GO:0009408	biological_process	response to heat
c49745_g1	GO:0030042	biological_process	actin filament depolymerization
c49745_g1	GO:0007015	biological_process	actin filament organization
c49745_g1	GO:0030041	biological_process	actin filament polymerization
c49745_g1	GO:0000915	biological_process	actomyosin contractile ring assembly
c49745_g1	GO:0007409	biological_process	axonogenesis
c49745_g1	GO:0007298	biological_process	border follicle cell migration
c49745_g1	GO:0000902	biological_process	cell morphogenesis
c49745_g1	GO:0048749	biological_process	compound eye development
c49745_g1	GO:0001745	biological_process	compound eye morphogenesis
c49745_g1	GO:0001737	biological_process	establishment of imaginal disc-derived wing hair orientation
c49745_g1	GO:0042067	biological_process	establishment of ommatidial planar polarity
c49745_g1	GO:0001736	biological_process	establishment of planar polarity
c49745_g1	GO:0008585	biological_process	female gonad development
c49745_g1	GO:0036011	biological_process	imaginal disc-derived leg segmentation
c49745_g1	GO:0000281	biological_process	mitotic cytokinesis
c49745_g1	GO:0016319	biological_process	mushroom body development
c49745_g1	GO:0010591	biological_process	regulation of lamellipodium assembly
c49745_g1	GO:0042052	biological_process	rhabdomere development
c49745_g1	GO:0030042	biological_process	actin filament depolymerization
c49745_g1	GO:0007015	biological_process	actin filament organization
c49745_g1	GO:0030041	biological_process	actin filament polymerization
c49745_g1	GO:0000915	biological_process	actomyosin contractile ring assembly
c49745_g1	GO:0007409	biological_process	axonogenesis
c49745_g1	GO:0007298	biological_process	border follicle cell migration
c49745_g1	GO:0000902	biological_process	cell morphogenesis
c49745_g1	GO:0048749	biological_process	compound eye development
c49745_g1	GO:0001745	biological_process	compound eye morphogenesis
c49745_g1	GO:0001737	biological_process	establishment of imaginal disc-derived wing hair orientation
c49745_g1	GO:0042067	biological_process	establishment of ommatidial planar polarity
c49745_g1	GO:0001736	biological_process	establishment of planar polarity
c49745_g1	GO:0008585	biological_process	female gonad development
c49745_g1	GO:0036011	biological_process	imaginal disc-derived leg segmentation
c49745_g1	GO:0000281	biological_process	mitotic cytokinesis
c49745_g1	GO:0016319	biological_process	mushroom body development
c49745_g1	GO:0010591	biological_process	regulation of lamellipodium assembly
c49745_g1	GO:0042052	biological_process	rhabdomere development
c49806_g1	GO:0043161	biological_process	proteasome-mediated ubiquitin-dependent protein catabolic process
c49883_g1	GO:0006750	biological_process	glutathione biosynthetic process
c49889_g1	GO:0006914	biological_process	autophagy
c49889_g1	GO:0008625	biological_process	extrinsic apoptotic signaling pathway via death domain receptors
c49889_g1	GO:0000226	biological_process	microtubule cytoskeleton organization
c49889_g1	GO:0015031	biological_process	protein transport
c49942_g1	GO:0051298	biological_process	centrosome duplication
c49942_g1	GO:0000022	biological_process	mitotic spindle elongation
c49942_g1	GO:0007052	biological_process	mitotic spindle organization
c49942_g1	GO:0035073	biological_process	pupariation
c50000_g1	GO:0002064	biological_process	epithelial cell development
c50000_g1	GO:0035150	biological_process	regulation of tube size
c50005_g2	GO:0006974	biological_process	cellular response to DNA damage stimulus
c50005_g2	GO:0002181	biological_process	cytoplasmic translation
c50005_g2	GO:0000737	biological_process	DNA catabolic process, endonucleolytic
c50005_g2	GO:0006281	biological_process	DNA repair
c50005_g2	GO:0007067	biological_process	mitotic nuclear division
c50005_g2	GO:0043524	biological_process	negative regulation of neuron apoptotic process
c50005_g2	GO:0032088	biological_process	negative regulation of NF-kappaB transcription factor activity
c50005_g2	GO:0006412	biological_process	translation
c50034_g1	GO:0016042	biological_process	lipid catabolic process
c50045_g1	GO:0006952	biological_process	defense response
c50045_g1	GO:0031408	biological_process	oxylipin biosynthetic process
c50072_g1	GO:0006355	biological_process	regulation of transcription, DNA-templated
c50072_g1	GO:0051123	biological_process	RNA polymerase II transcriptional preinitiation complex assembly
c50072_g1	GO:0006367	biological_process	transcription initiation from RNA polymerase II promoter
c50107_g1	GO:0007420	biological_process	brain development
c50107_g1	GO:0007155	biological_process	cell adhesion
c50107_g1	GO:0006928	biological_process	cellular component movement
c50107_g1	GO:0007342	biological_process	fusion of sperm to egg plasma membrane
c50107_g1	GO:0008285	biological_process	negative regulation of cell proliferation
c50107_g1	GO:0014003	biological_process	oligodendrocyte development
c50107_g1	GO:0030913	biological_process	paranodal junction assembly
c50107_g1	GO:0009414	biological_process	response to water deprivation
c50188_g1	GO:0006879	biological_process	cellular iron ion homeostasis
c50188_g1	GO:0006826	biological_process	iron ion transport
c50196_g1	GO:0006915	biological_process	apoptotic process
c50196_g1	GO:0008258	biological_process	head involution
c50196_g1	GO:0009968	biological_process	negative regulation of signal transduction
c50196_g1	GO:0032006	biological_process	regulation of TOR signaling
c50196_g1	GO:0006979	biological_process	response to oxidative stress
c50223_g1	GO:0005975	biological_process	carbohydrate metabolic process
c50257_g1	GO:0006096	biological_process	glycolytic process
c50261_g1	GO:0006950	biological_process	response to stress
c50261_g1	GO:0009415	biological_process	response to water
c50263_g1	GO:0019310	biological_process	inositol catabolic process
c50268_g1	GO:0048102	biological_process	autophagic cell death
c50268_g1	GO:0034599	biological_process	cellular response to oxidative stress
c50268_g1	GO:0008340	biological_process	determination of adult lifespan
c50268_g1	GO:0048812	biological_process	neuron projection morphogenesis
c50268_g1	GO:0030091	biological_process	protein repair
c50268_g1	GO:0006979	biological_process	response to oxidative stress
c50268_g1	GO:0035071	biological_process	salivary gland cell autophagic cell death
c50268_g1	GO:0000096	biological_process	sulfur amino acid metabolic process
c50311_g2	GO:0006030	biological_process	chitin metabolic process
c50311_g2	GO:0006030	biological_process	chitin metabolic process
c50440_g1	GO:0019859	biological_process	thymine metabolic process
c50440_g1	GO:0006573	biological_process	valine metabolic process
c50500_g1	GO:0046513	biological_process	ceramide biosynthetic process
c50500_g1	GO:0044281	biological_process	small molecule metabolic process
c50500_g1	GO:0030148	biological_process	sphingolipid biosynthetic process
c50500_g1	GO:0006665	biological_process	sphingolipid metabolic process
c50533_g1	GO:0009058	biological_process	biosynthetic process
c50541_g1	GO:0006869	biological_process	lipid transport
c50595_g2	GO:0043161	biological_process	proteasome-mediated ubiquitin-dependent protein catabolic process
c50595_g2	GO:0006508	biological_process	proteolysis
c50611_g1	GO:0006412	biological_process	translation
c50645_g1	GO:0055114	biological_process	oxidation-reduction process
c50645_g1	GO:0055114	biological_process	oxidation-reduction process
c50689_g1	GO:0016042	biological_process	lipid catabolic process
c50757_g1	GO:0006184	biological_process	GTP catabolic process
c50757_g1	GO:0045047	biological_process	protein targeting to ER
c50757_g1	GO:0042493	biological_process	response to drug
c50757_g1	GO:0006614	biological_process	SRP-dependent cotranslational protein targeting to membrane
c50762_g1	GO:0009651	biological_process	response to salt stress
c50762_g1	GO:0000028	biological_process	ribosomal small subunit assembly
c50762_g1	GO:0006412	biological_process	translation
c50795_g1	GO:0042254	biological_process	ribosome biogenesis
c50795_g1	GO:0042254	biological_process	ribosome biogenesis
c50813_g1	GO:0030036	biological_process	actin cytoskeleton organization
c50813_g1	GO:0051017	biological_process	actin filament bundle assembly
c50813_g1	GO:0007015	biological_process	actin filament organization
c50813_g1	GO:0070252	biological_process	actin-mediated cell contraction
c50813_g1	GO:0007411	biological_process	axon guidance
c50813_g1	GO:0007298	biological_process	border follicle cell migration
c50813_g1	GO:0035147	biological_process	branch fusion, open tracheal system
c50813_g1	GO:0090254	biological_process	cell elongation involved in imaginal disc-derived wing morphogenesis
c50813_g1	GO:0006974	biological_process	cellular response to DNA damage stimulus
c50813_g1	GO:0007349	biological_process	cellularization
c50813_g1	GO:0001745	biological_process	compound eye morphogenesis
c50813_g1	GO:0030866	biological_process	cortical actin cytoskeleton organization
c50813_g1	GO:0007010	biological_process	cytoskeleton organization
c50813_g1	GO:0048813	biological_process	dendrite morphogenesis
c50813_g1	GO:0070593	biological_process	dendrite self-avoidance
c50813_g1	GO:0007368	biological_process	determination of left/right symmetry
c50813_g1	GO:0007391	biological_process	dorsal closure
c50813_g1	GO:0046663	biological_process	dorsal closure, leading edge cell differentiation
c50813_g1	GO:0007395	biological_process	dorsal closure, spreading of leading edge cells
c50813_g1	GO:0006897	biological_process	endocytosis
c50813_g1	GO:0007173	biological_process	epidermal growth factor receptor signaling pathway
c50813_g1	GO:0001737	biological_process	establishment of imaginal disc-derived wing hair orientation
c50813_g1	GO:0001736	biological_process	establishment of planar polarity
c50813_g1	GO:0045184	biological_process	establishment of protein localization
c50813_g1	GO:0007164	biological_process	establishment of tissue polarity
c50813_g1	GO:0007369	biological_process	gastrulation
c50813_g1	GO:0010004	biological_process	gastrulation involving germ band extension
c50813_g1	GO:0008354	biological_process	germ cell migration
c50813_g1	GO:0007377	biological_process	germ-band extension
c50813_g1	GO:0008347	biological_process	glial cell migration
c50813_g1	GO:0006184	biological_process	GTP catabolic process
c50813_g1	GO:0035099	biological_process	hemocyte migration
c50813_g1	GO:0007480	biological_process	imaginal disc-derived leg morphogenesis
c50813_g1	GO:0035317	biological_process	imaginal disc-derived wing hair organization
c50813_g1	GO:0007254	biological_process	JNK cascade
c50813_g1	GO:0035149	biological_process	lumen formation, open tracheal system
c50813_g1	GO:0045199	biological_process	maintenance of epithelial cell apical/basal polarity
c50813_g1	GO:0035006	biological_process	melanization defense response
c50813_g1	GO:0000281	biological_process	mitotic cytokinesis
c50813_g1	GO:0008045	biological_process	motor neuron axon guidance
c50813_g1	GO:0007405	biological_process	neuroblast proliferation
c50813_g1	GO:0016318	biological_process	ommatidial rotation
c50813_g1	GO:0007424	biological_process	open tracheal system development
c50813_g1	GO:0007422	biological_process	peripheral nervous system development
c50813_g1	GO:0071902	biological_process	positive regulation of protein serine/threonine kinase activity
c50813_g1	GO:0007374	biological_process	posterior midgut invagination
c50813_g1	GO:0030589	biological_process	pseudocleavage involved in syncytial blastoderm formation
c50813_g1	GO:0050770	biological_process	regulation of axonogenesis
c50813_g1	GO:0051493	biological_process	regulation of cytoskeleton organization
c50813_g1	GO:0016476	biological_process	regulation of embryonic cell shape
c50813_g1	GO:0035298	biological_process	regulation of Malpighian tubule size
c50813_g1	GO:0035159	biological_process	regulation of tube length, open tracheal system
c50813_g1	GO:0007435	biological_process	salivary gland morphogenesis
c50813_g1	GO:0007264	biological_process	small GTPase mediated signal transduction
c50813_g1	GO:0035277	biological_process	spiracle morphogenesis, open tracheal system
c50813_g1	GO:0007370	biological_process	ventral furrow formation
c50813_g1	GO:0007601	biological_process	visual perception
c50813_g1	GO:0016055	biological_process	Wnt signaling pathway
c50813_g1	GO:0042060	biological_process	wound healing
c50813_g1	GO:0030036	biological_process	actin cytoskeleton organization
c50813_g1	GO:0051017	biological_process	actin filament bundle assembly
c50813_g1	GO:0007015	biological_process	actin filament organization
c50813_g1	GO:0070252	biological_process	actin-mediated cell contraction
c50813_g1	GO:0007411	biological_process	axon guidance
c50813_g1	GO:0007298	biological_process	border follicle cell migration
c50813_g1	GO:0035147	biological_process	branch fusion, open tracheal system
c50813_g1	GO:0090254	biological_process	cell elongation involved in imaginal disc-derived wing morphogenesis
c50813_g1	GO:0006974	biological_process	cellular response to DNA damage stimulus
c50813_g1	GO:0007349	biological_process	cellularization
c50813_g1	GO:0001745	biological_process	compound eye morphogenesis
c50813_g1	GO:0030866	biological_process	cortical actin cytoskeleton organization
c50813_g1	GO:0007010	biological_process	cytoskeleton organization
c50813_g1	GO:0048813	biological_process	dendrite morphogenesis
c50813_g1	GO:0070593	biological_process	dendrite self-avoidance
c50813_g1	GO:0007368	biological_process	determination of left/right symmetry
c50813_g1	GO:0007391	biological_process	dorsal closure
c50813_g1	GO:0046663	biological_process	dorsal closure, leading edge cell differentiation
c50813_g1	GO:0007395	biological_process	dorsal closure, spreading of leading edge cells
c50813_g1	GO:0006897	biological_process	endocytosis
c50813_g1	GO:0007173	biological_process	epidermal growth factor receptor signaling pathway
c50813_g1	GO:0001737	biological_process	establishment of imaginal disc-derived wing hair orientation
c50813_g1	GO:0001736	biological_process	establishment of planar polarity
c50813_g1	GO:0045184	biological_process	establishment of protein localization
c50813_g1	GO:0007164	biological_process	establishment of tissue polarity
c50813_g1	GO:0007369	biological_process	gastrulation
c50813_g1	GO:0010004	biological_process	gastrulation involving germ band extension
c50813_g1	GO:0008354	biological_process	germ cell migration
c50813_g1	GO:0007377	biological_process	germ-band extension
c50813_g1	GO:0008347	biological_process	glial cell migration
c50813_g1	GO:0006184	biological_process	GTP catabolic process
c50813_g1	GO:0035099	biological_process	hemocyte migration
c50813_g1	GO:0007480	biological_process	imaginal disc-derived leg morphogenesis
c50813_g1	GO:0035317	biological_process	imaginal disc-derived wing hair organization
c50813_g1	GO:0007254	biological_process	JNK cascade
c50813_g1	GO:0035149	biological_process	lumen formation, open tracheal system
c50813_g1	GO:0045199	biological_process	maintenance of epithelial cell apical/basal polarity
c50813_g1	GO:0035006	biological_process	melanization defense response
c50813_g1	GO:0000281	biological_process	mitotic cytokinesis
c50813_g1	GO:0008045	biological_process	motor neuron axon guidance
c50813_g1	GO:0007405	biological_process	neuroblast proliferation
c50813_g1	GO:0016318	biological_process	ommatidial rotation
c50813_g1	GO:0007424	biological_process	open tracheal system development
c50813_g1	GO:0007422	biological_process	peripheral nervous system development
c50813_g1	GO:0071902	biological_process	positive regulation of protein serine/threonine kinase activity
c50813_g1	GO:0007374	biological_process	posterior midgut invagination
c50813_g1	GO:0030589	biological_process	pseudocleavage involved in syncytial blastoderm formation
c50813_g1	GO:0050770	biological_process	regulation of axonogenesis
c50813_g1	GO:0051493	biological_process	regulation of cytoskeleton organization
c50813_g1	GO:0016476	biological_process	regulation of embryonic cell shape
c50813_g1	GO:0035298	biological_process	regulation of Malpighian tubule size
c50813_g1	GO:0035159	biological_process	regulation of tube length, open tracheal system
c50813_g1	GO:0007435	biological_process	salivary gland morphogenesis
c50813_g1	GO:0007264	biological_process	small GTPase mediated signal transduction
c50813_g1	GO:0035277	biological_process	spiracle morphogenesis, open tracheal system
c50813_g1	GO:0007370	biological_process	ventral furrow formation
c50813_g1	GO:0007601	biological_process	visual perception
c50813_g1	GO:0016055	biological_process	Wnt signaling pathway
c50813_g1	GO:0042060	biological_process	wound healing
c50813_g1	GO:0030036	biological_process	actin cytoskeleton organization
c50813_g1	GO:0051017	biological_process	actin filament bundle assembly
c50813_g1	GO:0007015	biological_process	actin filament organization
c50813_g1	GO:0070252	biological_process	actin-mediated cell contraction
c50813_g1	GO:0007411	biological_process	axon guidance
c50813_g1	GO:0007298	biological_process	border follicle cell migration
c50813_g1	GO:0035147	biological_process	branch fusion, open tracheal system
c50813_g1	GO:0090254	biological_process	cell elongation involved in imaginal disc-derived wing morphogenesis
c50813_g1	GO:0006974	biological_process	cellular response to DNA damage stimulus
c50813_g1	GO:0007349	biological_process	cellularization
c50813_g1	GO:0001745	biological_process	compound eye morphogenesis
c50813_g1	GO:0030866	biological_process	cortical actin cytoskeleton organization
c50813_g1	GO:0007010	biological_process	cytoskeleton organization
c50813_g1	GO:0048813	biological_process	dendrite morphogenesis
c50813_g1	GO:0070593	biological_process	dendrite self-avoidance
c50813_g1	GO:0007368	biological_process	determination of left/right symmetry
c50813_g1	GO:0007391	biological_process	dorsal closure
c50813_g1	GO:0046663	biological_process	dorsal closure, leading edge cell differentiation
c50813_g1	GO:0007395	biological_process	dorsal closure, spreading of leading edge cells
c50813_g1	GO:0006897	biological_process	endocytosis
c50813_g1	GO:0007173	biological_process	epidermal growth factor receptor signaling pathway
c50813_g1	GO:0001737	biological_process	establishment of imaginal disc-derived wing hair orientation
c50813_g1	GO:0001736	biological_process	establishment of planar polarity
c50813_g1	GO:0045184	biological_process	establishment of protein localization
c50813_g1	GO:0007164	biological_process	establishment of tissue polarity
c50813_g1	GO:0007369	biological_process	gastrulation
c50813_g1	GO:0010004	biological_process	gastrulation involving germ band extension
c50813_g1	GO:0008354	biological_process	germ cell migration
c50813_g1	GO:0007377	biological_process	germ-band extension
c50813_g1	GO:0008347	biological_process	glial cell migration
c50813_g1	GO:0006184	biological_process	GTP catabolic process
c50813_g1	GO:0035099	biological_process	hemocyte migration
c50813_g1	GO:0007480	biological_process	imaginal disc-derived leg morphogenesis
c50813_g1	GO:0035317	biological_process	imaginal disc-derived wing hair organization
c50813_g1	GO:0007254	biological_process	JNK cascade
c50813_g1	GO:0035149	biological_process	lumen formation, open tracheal system
c50813_g1	GO:0045199	biological_process	maintenance of epithelial cell apical/basal polarity
c50813_g1	GO:0035006	biological_process	melanization defense response
c50813_g1	GO:0000281	biological_process	mitotic cytokinesis
c50813_g1	GO:0008045	biological_process	motor neuron axon guidance
c50813_g1	GO:0007405	biological_process	neuroblast proliferation
c50813_g1	GO:0016318	biological_process	ommatidial rotation
c50813_g1	GO:0007424	biological_process	open tracheal system development
c50813_g1	GO:0007422	biological_process	peripheral nervous system development
c50813_g1	GO:0071902	biological_process	positive regulation of protein serine/threonine kinase activity
c50813_g1	GO:0007374	biological_process	posterior midgut invagination
c50813_g1	GO:0030589	biological_process	pseudocleavage involved in syncytial blastoderm formation
c50813_g1	GO:0050770	biological_process	regulation of axonogenesis
c50813_g1	GO:0051493	biological_process	regulation of cytoskeleton organization
c50813_g1	GO:0016476	biological_process	regulation of embryonic cell shape
c50813_g1	GO:0035298	biological_process	regulation of Malpighian tubule size
c50813_g1	GO:0035159	biological_process	regulation of tube length, open tracheal system
c50813_g1	GO:0007435	biological_process	salivary gland morphogenesis
c50813_g1	GO:0007264	biological_process	small GTPase mediated signal transduction
c50813_g1	GO:0035277	biological_process	spiracle morphogenesis, open tracheal system
c50813_g1	GO:0007370	biological_process	ventral furrow formation
c50813_g1	GO:0007601	biological_process	visual perception
c50813_g1	GO:0016055	biological_process	Wnt signaling pathway
c50813_g1	GO:0042060	biological_process	wound healing
c50813_g1	GO:0030036	biological_process	actin cytoskeleton organization
c50813_g1	GO:0051017	biological_process	actin filament bundle assembly
c50813_g1	GO:0007015	biological_process	actin filament organization
c50813_g1	GO:0070252	biological_process	actin-mediated cell contraction
c50813_g1	GO:0007411	biological_process	axon guidance
c50813_g1	GO:0007298	biological_process	border follicle cell migration
c50813_g1	GO:0035147	biological_process	branch fusion, open tracheal system
c50813_g1	GO:0090254	biological_process	cell elongation involved in imaginal disc-derived wing morphogenesis
c50813_g1	GO:0006974	biological_process	cellular response to DNA damage stimulus
c50813_g1	GO:0007349	biological_process	cellularization
c50813_g1	GO:0001745	biological_process	compound eye morphogenesis
c50813_g1	GO:0030866	biological_process	cortical actin cytoskeleton organization
c50813_g1	GO:0007010	biological_process	cytoskeleton organization
c50813_g1	GO:0048813	biological_process	dendrite morphogenesis
c50813_g1	GO:0070593	biological_process	dendrite self-avoidance
c50813_g1	GO:0007368	biological_process	determination of left/right symmetry
c50813_g1	GO:0007391	biological_process	dorsal closure
c50813_g1	GO:0046663	biological_process	dorsal closure, leading edge cell differentiation
c50813_g1	GO:0007395	biological_process	dorsal closure, spreading of leading edge cells
c50813_g1	GO:0006897	biological_process	endocytosis
c50813_g1	GO:0007173	biological_process	epidermal growth factor receptor signaling pathway
c50813_g1	GO:0001737	biological_process	establishment of imaginal disc-derived wing hair orientation
c50813_g1	GO:0001736	biological_process	establishment of planar polarity
c50813_g1	GO:0045184	biological_process	establishment of protein localization
c50813_g1	GO:0007164	biological_process	establishment of tissue polarity
c50813_g1	GO:0007369	biological_process	gastrulation
c50813_g1	GO:0010004	biological_process	gastrulation involving germ band extension
c50813_g1	GO:0008354	biological_process	germ cell migration
c50813_g1	GO:0007377	biological_process	germ-band extension
c50813_g1	GO:0008347	biological_process	glial cell migration
c50813_g1	GO:0006184	biological_process	GTP catabolic process
c50813_g1	GO:0035099	biological_process	hemocyte migration
c50813_g1	GO:0007480	biological_process	imaginal disc-derived leg morphogenesis
c50813_g1	GO:0035317	biological_process	imaginal disc-derived wing hair organization
c50813_g1	GO:0007254	biological_process	JNK cascade
c50813_g1	GO:0035149	biological_process	lumen formation, open tracheal system
c50813_g1	GO:0045199	biological_process	maintenance of epithelial cell apical/basal polarity
c50813_g1	GO:0035006	biological_process	melanization defense response
c50813_g1	GO:0000281	biological_process	mitotic cytokinesis
c50813_g1	GO:0008045	biological_process	motor neuron axon guidance
c50813_g1	GO:0007405	biological_process	neuroblast proliferation
c50813_g1	GO:0016318	biological_process	ommatidial rotation
c50813_g1	GO:0007424	biological_process	open tracheal system development
c50813_g1	GO:0007422	biological_process	peripheral nervous system development
c50813_g1	GO:0071902	biological_process	positive regulation of protein serine/threonine kinase activity
c50813_g1	GO:0007374	biological_process	posterior midgut invagination
c50813_g1	GO:0030589	biological_process	pseudocleavage involved in syncytial blastoderm formation
c50813_g1	GO:0050770	biological_process	regulation of axonogenesis
c50813_g1	GO:0051493	biological_process	regulation of cytoskeleton organization
c50813_g1	GO:0016476	biological_process	regulation of embryonic cell shape
c50813_g1	GO:0035298	biological_process	regulation of Malpighian tubule size
c50813_g1	GO:0035159	biological_process	regulation of tube length, open tracheal system
c50813_g1	GO:0007435	biological_process	salivary gland morphogenesis
c50813_g1	GO:0007264	biological_process	small GTPase mediated signal transduction
c50813_g1	GO:0035277	biological_process	spiracle morphogenesis, open tracheal system
c50813_g1	GO:0007370	biological_process	ventral furrow formation
c50813_g1	GO:0007601	biological_process	visual perception
c50813_g1	GO:0016055	biological_process	Wnt signaling pathway
c50813_g1	GO:0042060	biological_process	wound healing
c50817_g1	GO:0006952	biological_process	defense response
c50817_g1	GO:0009607	biological_process	response to biotic stimulus
c50817_g1	GO:0080184	biological_process	response to phenylpropanoid
c50817_g1	GO:0010043	biological_process	response to zinc ion
c50817_g1	GO:0010228	biological_process	vegetative to reproductive phase transition of meristem
c50821_g1	GO:0019471	biological_process	4-hydroxyproline metabolic process
c50821_g1	GO:0045454	biological_process	cell redox homeostasis
c50821_g1	GO:0030198	biological_process	extracellular matrix organization
c50821_g1	GO:0008584	biological_process	male gonad development
c50821_g1	GO:2000255	biological_process	negative regulation of male germ cell proliferation
c50821_g1	GO:0055114	biological_process	oxidation-reduction process
c50821_g1	GO:0022417	biological_process	protein maturation by protein folding
c50821_g1	GO:0072593	biological_process	reactive oxygen species metabolic process
c50821_g1	GO:0007283	biological_process	spermatogenesis
c50840_g1	GO:0006897	biological_process	endocytosis
c50840_g1	GO:0015031	biological_process	protein transport
c50871_g1	GO:0045333	biological_process	cellular respiration
c50976_g1	GO:0030435	biological_process	sporulation resulting in formation of a cellular spore
c51012_g1	GO:0007010	biological_process	cytoskeleton organization
c51012_g1	GO:0051179	biological_process	localization
c51012_g1	GO:0035046	biological_process	pronuclear migration
c51036_g1	GO:0006811	biological_process	ion transport
c51036_g1	GO:0007005	biological_process	mitochondrion organization
c51036_g1	GO:0007602	biological_process	phototransduction
c51036_g1	GO:0007291	biological_process	sperm individualization
c51036_g1	GO:0030382	biological_process	sperm mitochondrion organization
c51051_g3	GO:0048512	biological_process	circadian behavior
c51051_g3	GO:0007623	biological_process	circadian rhythm
c51051_g3	GO:0045433	biological_process	male courtship behavior, veined wing generated song production
c51051_g3	GO:0071805	biological_process	potassium ion transmembrane transport
c51051_g3	GO:0006813	biological_process	potassium ion transport
c51051_g3	GO:0042493	biological_process	response to drug
c51051_g3	GO:0048512	biological_process	circadian behavior
c51051_g3	GO:0007623	biological_process	circadian rhythm
c51051_g3	GO:0045433	biological_process	male courtship behavior, veined wing generated song production
c51051_g3	GO:0071805	biological_process	potassium ion transmembrane transport
c51051_g3	GO:0006813	biological_process	potassium ion transport
c51051_g3	GO:0042493	biological_process	response to drug
c51051_g3	GO:0048512	biological_process	circadian behavior
c51051_g3	GO:0007623	biological_process	circadian rhythm
c51051_g3	GO:0045433	biological_process	male courtship behavior, veined wing generated song production
c51051_g3	GO:0071805	biological_process	potassium ion transmembrane transport
c51051_g3	GO:0006813	biological_process	potassium ion transport
c51051_g3	GO:0042493	biological_process	response to drug
c51051_g3	GO:0048512	biological_process	circadian behavior
c51051_g3	GO:0007623	biological_process	circadian rhythm
c51051_g3	GO:0045433	biological_process	male courtship behavior, veined wing generated song production
c51051_g3	GO:0071805	biological_process	potassium ion transmembrane transport
c51051_g3	GO:0006813	biological_process	potassium ion transport
c51051_g3	GO:0042493	biological_process	response to drug
c51101_g1	GO:0006086	biological_process	acetyl-CoA biosynthetic process from pyruvate
c51101_g1	GO:0006006	biological_process	glucose metabolic process
c51101_g1	GO:0006099	biological_process	tricarboxylic acid cycle
c51118_g1	GO:0016998	biological_process	cell wall macromolecule catabolic process
c51118_g1	GO:0006032	biological_process	chitin catabolic process
c51118_g1	GO:0006952	biological_process	defense response
c51118_g1	GO:0000272	biological_process	polysaccharide catabolic process
c51118_g1	GO:0010262	biological_process	somatic embryogenesis
c51158_g1	GO:0034332	biological_process	adherens junction organization
c51158_g1	GO:0006241	biological_process	CTP biosynthetic process
c51158_g1	GO:0007427	biological_process	epithelial cell migration, open tracheal system
c51158_g1	GO:0016334	biological_process	establishment or maintenance of polarity of follicular epithelium
c51158_g1	GO:0006183	biological_process	GTP biosynthetic process
c51158_g1	GO:0007017	biological_process	microtubule-based process
c51158_g1	GO:0007067	biological_process	mitotic nuclear division
c51158_g1	GO:0006165	biological_process	nucleoside diphosphate phosphorylation
c51158_g1	GO:0009117	biological_process	nucleotide metabolic process
c51158_g1	GO:0007424	biological_process	open tracheal system development
c51158_g1	GO:0018105	biological_process	peptidyl-serine phosphorylation
c51158_g1	GO:0046777	biological_process	protein autophosphorylation
c51158_g1	GO:0006468	biological_process	protein phosphorylation
c51158_g1	GO:0035152	biological_process	regulation of tube architecture, open tracheal system
c51158_g1	GO:0006228	biological_process	UTP biosynthetic process
c51218_g1	GO:0007049	biological_process	cell cycle
c51218_g1	GO:0007049	biological_process	cell cycle
c51218_g1	GO:0007049	biological_process	cell cycle
c51218_g1	GO:0007049	biological_process	cell cycle
c51224_g1	GO:0005975	biological_process	carbohydrate metabolic process
c51227_g1	GO:0045490	biological_process	pectin catabolic process
c51228_g1	GO:0007283	biological_process	spermatogenesis
c51228_g1	GO:0007283	biological_process	spermatogenesis
c51242_g1	GO:0033345	biological_process	asparagine catabolic process via L-aspartate
c51243_g1	GO:0006950	biological_process	response to stress
c51243_g1	GO:0009415	biological_process	response to water
c51243_g1	GO:0006950	biological_process	response to stress
c51243_g1	GO:0009415	biological_process	response to water
c51266_g2	GO:0006412	biological_process	translation
c51279_g1	GO:0006812	biological_process	cation transport
c51279_g1	GO:0006813	biological_process	potassium ion transport
c51279_g1	GO:0035725	biological_process	sodium ion transmembrane transport
c51343_g1	GO:0007507	biological_process	heart development
c51413_g1	GO:0007586	biological_process	digestion
c51500_g1	GO:0006094	biological_process	gluconeogenesis
c51500_g1	GO:0006096	biological_process	glycolytic process
c51500_g1	GO:0006098	biological_process	pentose-phosphate shunt
c51500_g1	GO:0006094	biological_process	gluconeogenesis
c51500_g1	GO:0006096	biological_process	glycolytic process
c51500_g1	GO:0006098	biological_process	pentose-phosphate shunt
c51509_g1	GO:0006030	biological_process	chitin metabolic process
c51545_g1	GO:0016042	biological_process	lipid catabolic process
c51557_g1	GO:0033345	biological_process	asparagine catabolic process via L-aspartate
c51560_g1	GO:0008069	biological_process	dorsal/ventral axis specification, ovarian follicular epithelium
c51560_g1	GO:0009953	biological_process	dorsal/ventral pattern formation
c51560_g1	GO:0007293	biological_process	germarium-derived egg chamber formation
c51560_g1	GO:0008298	biological_process	intracellular mRNA localization
c51560_g1	GO:0006406	biological_process	mRNA export from nucleus
c51560_g1	GO:0000398	biological_process	mRNA splicing, via spliceosome
c51560_g1	GO:0033119	biological_process	negative regulation of RNA splicing
c51560_g1	GO:0017148	biological_process	negative regulation of translation
c51560_g1	GO:0000184	biological_process	nuclear-transcribed mRNA catabolic process, nonsense-mediated decay
c51560_g1	GO:0007314	biological_process	oocyte anterior/posterior axis specification
c51560_g1	GO:0030720	biological_process	oocyte localization involved in germarium-derived egg chamber formation
c51560_g1	GO:0016325	biological_process	oocyte microtubule cytoskeleton organization
c51560_g1	GO:0048477	biological_process	oogenesis
c51560_g1	GO:0007297	biological_process	ovarian follicle cell migration
c51560_g1	GO:0019094	biological_process	pole plasm mRNA localization
c51560_g1	GO:0045451	biological_process	pole plasm oskar mRNA localization
c51560_g1	GO:0000381	biological_process	regulation of alternative mRNA splicing, via spliceosome
c51560_g1	GO:0006405	biological_process	RNA export from nucleus
c51560_g1	GO:0008069	biological_process	dorsal/ventral axis specification, ovarian follicular epithelium
c51560_g1	GO:0009953	biological_process	dorsal/ventral pattern formation
c51560_g1	GO:0007293	biological_process	germarium-derived egg chamber formation
c51560_g1	GO:0008298	biological_process	intracellular mRNA localization
c51560_g1	GO:0006406	biological_process	mRNA export from nucleus
c51560_g1	GO:0000398	biological_process	mRNA splicing, via spliceosome
c51560_g1	GO:0033119	biological_process	negative regulation of RNA splicing
c51560_g1	GO:0017148	biological_process	negative regulation of translation
c51560_g1	GO:0000184	biological_process	nuclear-transcribed mRNA catabolic process, nonsense-mediated decay
c51560_g1	GO:0007314	biological_process	oocyte anterior/posterior axis specification
c51560_g1	GO:0030720	biological_process	oocyte localization involved in germarium-derived egg chamber formation
c51560_g1	GO:0016325	biological_process	oocyte microtubule cytoskeleton organization
c51560_g1	GO:0048477	biological_process	oogenesis
c51560_g1	GO:0007297	biological_process	ovarian follicle cell migration
c51560_g1	GO:0019094	biological_process	pole plasm mRNA localization
c51560_g1	GO:0045451	biological_process	pole plasm oskar mRNA localization
c51560_g1	GO:0000381	biological_process	regulation of alternative mRNA splicing, via spliceosome
c51560_g1	GO:0006405	biological_process	RNA export from nucleus
c51590_g1	GO:0006094	biological_process	gluconeogenesis
c51590_g1	GO:0006096	biological_process	glycolytic process
c51590_g1	GO:0046689	biological_process	response to mercury ion
c51590_g1	GO:0007283	biological_process	spermatogenesis
c51590_g1	GO:0006941	biological_process	striated muscle contraction
c51613_g1	GO:0019730	biological_process	antimicrobial humoral response
c51613_g1	GO:0009987	biological_process	cellular process
c51613_g1	GO:0007094	biological_process	mitotic spindle assembly checkpoint
c51613_g1	GO:0007052	biological_process	mitotic spindle organization
c51613_g1	GO:0051258	biological_process	protein polymerization
c51710_g1	GO:0030154	biological_process	cell differentiation
c51710_g1	GO:0007275	biological_process	multicellular organismal development
c51710_g1	GO:0048477	biological_process	oogenesis
c51710_g1	GO:0006412	biological_process	translation
c51731_g1	GO:0006412	biological_process	translation
c51735_g4	GO:0008340	biological_process	determination of adult lifespan
c51735_g4	GO:0006412	biological_process	translation
c51735_g5	GO:0008340	biological_process	determination of adult lifespan
c51735_g5	GO:0006412	biological_process	translation
c51752_g1	GO:0006355	biological_process	regulation of transcription, DNA-templated
c51752_g1	GO:0010200	biological_process	response to chitin
c51752_g1	GO:0006351	biological_process	transcription, DNA-templated
c51752_g2	GO:0006355	biological_process	regulation of transcription, DNA-templated
c51752_g2	GO:0010200	biological_process	response to chitin
c51752_g2	GO:0006351	biological_process	transcription, DNA-templated
c51752_g2	GO:0006355	biological_process	regulation of transcription, DNA-templated
c51752_g2	GO:0010200	biological_process	response to chitin
c51752_g2	GO:0006351	biological_process	transcription, DNA-templated
c51762_g1	GO:0042742	biological_process	defense response to bacterium
c51762_g1	GO:0050832	biological_process	defense response to fungus
c51762_g1	GO:0031347	biological_process	regulation of defense response
c51762_g1	GO:0050691	biological_process	regulation of defense response to virus by host
c51762_g1	GO:0010200	biological_process	response to chitin
c51762_g1	GO:0002237	biological_process	response to molecule of bacterial origin
c51762_g1	GO:0009751	biological_process	response to salicylic acid
c51762_g1	GO:0009611	biological_process	response to wounding
c51762_g1	GO:0006351	biological_process	transcription, DNA-templated
c51765_g2	GO:0006281	biological_process	DNA repair
c51765_g2	GO:0006334	biological_process	nucleosome assembly
c51805_g1	GO:0007586	biological_process	digestion
c51852_g1	GO:0006412	biological_process	translation
c51852_g1	GO:0006412	biological_process	translation
c51852_g1	GO:0006412	biological_process	translation
c51911_g1	GO:0030198	biological_process	extracellular matrix organization
c51911_g1	GO:0010811	biological_process	positive regulation of cell-substrate adhesion
c51944_g1	GO:0007586	biological_process	digestion
c51948_g1	GO:0042048	biological_process	olfactory behavior
c51948_g1	GO:0019236	biological_process	response to pheromone
c51948_g1	GO:0007606	biological_process	sensory perception of chemical stimulus
c51948_g1	GO:0007608	biological_process	sensory perception of smell
c51948_g1	GO:0006810	biological_process	transport
c51958_g5	GO:0006412	biological_process	translation
c51969_g1	GO:0043086	biological_process	negative regulation of catalytic activity
c51994_g1	GO:0016339	biological_process	calcium-dependent cell-cell adhesion
c51994_g1	GO:0016477	biological_process	cell migration
c51994_g1	GO:0048870	biological_process	cell motility
c51994_g1	GO:0031589	biological_process	cell-substrate adhesion
c51994_g1	GO:0043327	biological_process	chemotaxis to cAMP
c51994_g1	GO:0043326	biological_process	chemotaxis to folate
c51994_g1	GO:0031154	biological_process	culmination involved in sorocarp development
c51994_g1	GO:0007109	biological_process	cytokinesis, completion of separation
c51994_g1	GO:0006897	biological_process	endocytosis
c51994_g1	GO:0040011	biological_process	locomotion
c51994_g1	GO:0000281	biological_process	mitotic cytokinesis
c51994_g1	GO:0050765	biological_process	negative regulation of phagocytosis
c51994_g1	GO:0045921	biological_process	positive regulation of exocytosis
c51994_g1	GO:2000249	biological_process	regulation of actin cytoskeleton reorganization
c51997_g1	GO:0006412	biological_process	translation
c52013_g1	GO:0030245	biological_process	cellulose catabolic process
c52051_g1	GO:0008612	biological_process	peptidyl-lysine modification to peptidyl-hypusine
c52051_g1	GO:0045901	biological_process	positive regulation of translational elongation
c52051_g1	GO:0045905	biological_process	positive regulation of translational termination
c52051_g1	GO:0006452	biological_process	translational frameshifting
c52051_g1	GO:0008612	biological_process	peptidyl-lysine modification to peptidyl-hypusine
c52051_g1	GO:0045901	biological_process	positive regulation of translational elongation
c52051_g1	GO:0045905	biological_process	positive regulation of translational termination
c52051_g1	GO:0006452	biological_process	translational frameshifting
c52089_g1	GO:0006397	biological_process	mRNA processing
c52089_g1	GO:0008380	biological_process	RNA splicing
c52144_g1	GO:0046686	biological_process	response to cadmium ion
c52144_g1	GO:0006979	biological_process	response to oxidative stress
c52144_g1	GO:0009651	biological_process	response to salt stress
c52192_g1	GO:0045944	biological_process	positive regulation of transcription from RNA polymerase II promoter
c52217_g1	GO:0042572	biological_process	retinol metabolic process
c52235_g1	GO:0035928	biological_process	rRNA import into mitochondrion
c52235_g1	GO:0006412	biological_process	translation
c52289_g1	GO:0042823	biological_process	pyridoxal phosphate biosynthetic process
c52289_g1	GO:0008615	biological_process	pyridoxine biosynthetic process
c52306_g1	GO:0006749	biological_process	glutathione metabolic process
c52306_g1	GO:0008152	biological_process	metabolic process
c52306_g1	GO:0055114	biological_process	oxidation-reduction process
c52317_g1	GO:0006749	biological_process	glutathione metabolic process
c52328_g1	GO:0008340	biological_process	determination of adult lifespan
c52328_g1	GO:0035206	biological_process	regulation of hemocyte proliferation
c52328_g1	GO:0019222	biological_process	regulation of metabolic process
c52328_g1	GO:0006801	biological_process	superoxide metabolic process
c52357_g2	GO:0010951	biological_process	negative regulation of endopeptidase activity
c52357_g2	GO:0030162	biological_process	regulation of proteolysis
c52357_g2	GO:0010951	biological_process	negative regulation of endopeptidase activity
c52357_g2	GO:0030162	biological_process	regulation of proteolysis
c52377_g1	GO:0007568	biological_process	aging
c52377_g1	GO:0001525	biological_process	angiogenesis
c52377_g1	GO:0007420	biological_process	brain development
c52377_g1	GO:0006006	biological_process	glucose metabolic process
c52377_g1	GO:0006629	biological_process	lipid metabolic process
c52377_g1	GO:0006869	biological_process	lipid transport
c52377_g1	GO:1900016	biological_process	negative regulation of cytokine production involved in inflammatory response
c52377_g1	GO:0051895	biological_process	negative regulation of focal adhesion assembly
c52377_g1	GO:0060588	biological_process	negative regulation of lipoprotein lipid oxidation
c52377_g1	GO:0071638	biological_process	negative regulation of monocyte chemotactic protein-1 production
c52377_g1	GO:0010642	biological_process	negative regulation of platelet-derived growth factor receptor signaling pathway
c52377_g1	GO:0042308	biological_process	negative regulation of protein import into nucleus
c52377_g1	GO:0048662	biological_process	negative regulation of smooth muscle cell proliferation
c52377_g1	GO:2000098	biological_process	negative regulation of smooth muscle cell-matrix adhesion
c52377_g1	GO:2000405	biological_process	negative regulation of T cell migration
c52377_g1	GO:0014012	biological_process	peripheral nervous system axon regeneration
c52377_g1	GO:0048678	biological_process	response to axon injury
c52377_g1	GO:0042493	biological_process	response to drug
c52377_g1	GO:0000302	biological_process	response to reactive oxygen species
c52377_g1	GO:0042246	biological_process	tissue regeneration
c52377_g1	GO:0007568	biological_process	aging
c52377_g1	GO:0001525	biological_process	angiogenesis
c52377_g1	GO:0007420	biological_process	brain development
c52377_g1	GO:0006006	biological_process	glucose metabolic process
c52377_g1	GO:0006629	biological_process	lipid metabolic process
c52377_g1	GO:0006869	biological_process	lipid transport
c52377_g1	GO:1900016	biological_process	negative regulation of cytokine production involved in inflammatory response
c52377_g1	GO:0051895	biological_process	negative regulation of focal adhesion assembly
c52377_g1	GO:0060588	biological_process	negative regulation of lipoprotein lipid oxidation
c52377_g1	GO:0071638	biological_process	negative regulation of monocyte chemotactic protein-1 production
c52377_g1	GO:0010642	biological_process	negative regulation of platelet-derived growth factor receptor signaling pathway
c52377_g1	GO:0042308	biological_process	negative regulation of protein import into nucleus
c52377_g1	GO:0048662	biological_process	negative regulation of smooth muscle cell proliferation
c52377_g1	GO:2000098	biological_process	negative regulation of smooth muscle cell-matrix adhesion
c52377_g1	GO:2000405	biological_process	negative regulation of T cell migration
c52377_g1	GO:0014012	biological_process	peripheral nervous system axon regeneration
c52377_g1	GO:0048678	biological_process	response to axon injury
c52377_g1	GO:0042493	biological_process	response to drug
c52377_g1	GO:0000302	biological_process	response to reactive oxygen species
c52377_g1	GO:0042246	biological_process	tissue regeneration
c52396_g1	GO:0006412	biological_process	translation
c52396_g1	GO:0006412	biological_process	translation
c52396_g1	GO:0006412	biological_process	translation
c52445_g1	GO:0015991	biological_process	ATP hydrolysis coupled proton transport
c52445_g1	GO:0015986	biological_process	ATP synthesis coupled proton transport
c52445_g1	GO:0040007	biological_process	growth
c52445_g1	GO:0006909	biological_process	phagocytosis
c52445_g1	GO:0007286	biological_process	spermatid development
c52462_g1	GO:0030245	biological_process	cellulose catabolic process
c52462_g1	GO:0030245	biological_process	cellulose catabolic process
c52475_g1	GO:0030307	biological_process	positive regulation of cell growth
c52475_g1	GO:0006479	biological_process	protein methylation
c52475_g1	GO:0030307	biological_process	positive regulation of cell growth
c52475_g1	GO:0006479	biological_process	protein methylation
c52483_g1	GO:0015760	biological_process	glucose-6-phosphate transport
c52483_g1	GO:0015714	biological_process	phosphoenolpyruvate transport
c52483_g1	GO:0015713	biological_process	phosphoglycerate transport
c52483_g1	GO:0015979	biological_process	photosynthesis
c52483_g1	GO:0009643	biological_process	photosynthetic acclimation
c52483_g1	GO:0010109	biological_process	regulation of photosynthesis
c52483_g1	GO:0009749	biological_process	response to glucose
c52483_g1	GO:0080167	biological_process	response to karrikin
c52483_g1	GO:0009624	biological_process	response to nematode
c52483_g1	GO:0009744	biological_process	response to sucrose
c52483_g1	GO:0035436	biological_process	triose phosphate transmembrane transport
c52483_g1	GO:0015760	biological_process	glucose-6-phosphate transport
c52483_g1	GO:0015714	biological_process	phosphoenolpyruvate transport
c52483_g1	GO:0015713	biological_process	phosphoglycerate transport
c52483_g1	GO:0015979	biological_process	photosynthesis
c52483_g1	GO:0009643	biological_process	photosynthetic acclimation
c52483_g1	GO:0010109	biological_process	regulation of photosynthesis
c52483_g1	GO:0009749	biological_process	response to glucose
c52483_g1	GO:0080167	biological_process	response to karrikin
c52483_g1	GO:0009624	biological_process	response to nematode
c52483_g1	GO:0009744	biological_process	response to sucrose
c52483_g1	GO:0035436	biological_process	triose phosphate transmembrane transport
c52511_g1	GO:0006914	biological_process	autophagy
c52511_g1	GO:0071260	biological_process	cellular response to mechanical stimulus
c52511_g1	GO:0060548	biological_process	negative regulation of cell death
c52511_g1	GO:0006508	biological_process	proteolysis
c52511_g1	GO:0050790	biological_process	regulation of catalytic activity
c52511_g1	GO:0014075	biological_process	response to amine
c52511_g1	GO:0034097	biological_process	response to cytokine
c52511_g1	GO:0045471	biological_process	response to ethanol
c52511_g1	GO:0009749	biological_process	response to glucose
c52511_g1	GO:0070670	biological_process	response to interleukin-4
c52511_g1	GO:0009612	biological_process	response to mechanical stimulus
c52511_g1	GO:0014070	biological_process	response to organic cyclic compound
c52511_g1	GO:0043434	biological_process	response to peptide hormone
c52511_g1	GO:0009611	biological_process	response to wounding
c52511_g1	GO:0007519	biological_process	skeletal muscle tissue development
c52511_g1	GO:0007283	biological_process	spermatogenesis
c52533_g1	GO:0006412	biological_process	translation
c52614_g1	GO:0006073	biological_process	cellular glucan metabolic process
c52614_g1	GO:0006073	biological_process	cellular glucan metabolic process
c52614_g1	GO:0006073	biological_process	cellular glucan metabolic process
c52614_g1	GO:0009664	biological_process	plant-type cell wall organization
c52614_g1	GO:0009733	biological_process	response to auxin
c52614_g1	GO:0009741	biological_process	response to brassinosteroid
c52614_g1	GO:0009409	biological_process	response to cold
c52614_g1	GO:0009408	biological_process	response to heat
c52614_g1	GO:0009612	biological_process	response to mechanical stimulus
c52614_g1	GO:0006073	biological_process	cellular glucan metabolic process
c52640_g1	GO:0007050	biological_process	cell cycle arrest
c52640_g1	GO:0008283	biological_process	cell proliferation
c52640_g1	GO:0045892	biological_process	negative regulation of transcription, DNA-templated
c52640_g1	GO:0006417	biological_process	regulation of translation
c52640_g1	GO:0006364	biological_process	rRNA processing
c52640_g1	GO:0006351	biological_process	transcription, DNA-templated
c52647_g1	GO:0046835	biological_process	carbohydrate phosphorylation
c52647_g1	GO:0001678	biological_process	cellular glucose homeostasis
c52647_g1	GO:0051156	biological_process	glucose 6-phosphate metabolic process
c52647_g1	GO:0006096	biological_process	glycolytic process
c52647_g1	GO:0019318	biological_process	hexose metabolic process
c52647_g1	GO:0046835	biological_process	carbohydrate phosphorylation
c52647_g1	GO:0001678	biological_process	cellular glucose homeostasis
c52647_g1	GO:0051156	biological_process	glucose 6-phosphate metabolic process
c52647_g1	GO:0006096	biological_process	glycolytic process
c52647_g1	GO:0019318	biological_process	hexose metabolic process
c52647_g1	GO:0046835	biological_process	carbohydrate phosphorylation
c52647_g1	GO:0001678	biological_process	cellular glucose homeostasis
c52647_g1	GO:0051156	biological_process	glucose 6-phosphate metabolic process
c52647_g1	GO:0006096	biological_process	glycolytic process
c52647_g1	GO:0019318	biological_process	hexose metabolic process
c52667_g1	GO:0006073	biological_process	cellular glucan metabolic process
c52667_g1	GO:0009832	biological_process	plant-type cell wall biogenesis
c52680_g1	GO:0006465	biological_process	signal peptide processing
c52683_g1	GO:0007610	biological_process	behavior
c52683_g1	GO:0007620	biological_process	copulation
c52683_g1	GO:0007610	biological_process	behavior
c52683_g1	GO:0007620	biological_process	copulation
c52683_g1	GO:0007610	biological_process	behavior
c52683_g1	GO:0007620	biological_process	copulation
c52709_g1	GO:0006801	biological_process	superoxide metabolic process
c52710_g1	GO:0007596	biological_process	blood coagulation
c52710_g1	GO:0008219	biological_process	cell death
c52710_g1	GO:0034220	biological_process	ion transmembrane transport
c52710_g1	GO:0055085	biological_process	transmembrane transport
c52710_g1	GO:0006810	biological_process	transport
c52710_g1	GO:0007596	biological_process	blood coagulation
c52710_g1	GO:0008219	biological_process	cell death
c52710_g1	GO:0034220	biological_process	ion transmembrane transport
c52710_g1	GO:0055085	biological_process	transmembrane transport
c52710_g1	GO:0006810	biological_process	transport
c52710_g2	GO:0007596	biological_process	blood coagulation
c52710_g2	GO:0008219	biological_process	cell death
c52710_g2	GO:0034220	biological_process	ion transmembrane transport
c52710_g2	GO:0055085	biological_process	transmembrane transport
c52710_g2	GO:0006810	biological_process	transport
c52710_g2	GO:0007568	biological_process	aging
c52710_g2	GO:0007420	biological_process	brain development
c52710_g2	GO:1901660	biological_process	calcium ion export
c52710_g2	GO:0071386	biological_process	cellular response to corticosterone stimulus
c52710_g2	GO:0071305	biological_process	cellular response to vitamin D
c52710_g2	GO:0003407	biological_process	neural retina development
c52710_g2	GO:0009409	biological_process	response to cold
c52729_g1	GO:0015031	biological_process	protein transport
c52744_g1	GO:0006915	biological_process	apoptotic process
c52744_g1	GO:0006814	biological_process	sodium ion transport
c52781_g1	GO:0031047	biological_process	gene silencing by RNA
c52781_g1	GO:0007126	biological_process	meiotic nuclear division
c52781_g1	GO:0007275	biological_process	multicellular organismal development
c52781_g1	GO:0034587	biological_process	piRNA metabolic process
c52781_g1	GO:0006417	biological_process	regulation of translation
c52781_g1	GO:0007286	biological_process	spermatid development
c52798_g1	GO:0016999	biological_process	antibiotic metabolic process
c52798_g1	GO:0016999	biological_process	antibiotic metabolic process
c52803_g2	GO:0005975	biological_process	carbohydrate metabolic process
c52803_g2	GO:0005975	biological_process	carbohydrate metabolic process
c52803_g2	GO:0005975	biological_process	carbohydrate metabolic process
c52803_g3	GO:0005975	biological_process	carbohydrate metabolic process
c52803_g3	GO:0005975	biological_process	carbohydrate metabolic process
c52803_g2	GO:0005975	biological_process	carbohydrate metabolic process
c52826_g1	GO:0009686	biological_process	gibberellin biosynthetic process
c52826_g1	GO:0009685	biological_process	gibberellin metabolic process
c52826_g1	GO:0009686	biological_process	gibberellin biosynthetic process
c52826_g1	GO:0009685	biological_process	gibberellin metabolic process
c52870_g1	GO:0042254	biological_process	ribosome biogenesis
c52870_g1	GO:0006414	biological_process	translational elongation
c52874_g1	GO:0000902	biological_process	cell morphogenesis
c52874_g1	GO:0007023	biological_process	post-chaperonin tubulin folding pathway
c52889_g3	GO:0022416	biological_process	chaeta development
c52889_g3	GO:0097167	biological_process	circadian regulation of translation
c52889_g3	GO:0048749	biological_process	compound eye development
c52889_g3	GO:0042051	biological_process	compound eye photoreceptor development
c52889_g3	GO:0045475	biological_process	locomotor rhythm
c52889_g3	GO:0022008	biological_process	neurogenesis
c52889_g3	GO:0009994	biological_process	oocyte differentiation
c52889_g3	GO:0006909	biological_process	phagocytosis
c52889_g3	GO:1901216	biological_process	positive regulation of neuron death
c52889_g3	GO:0032092	biological_process	positive regulation of protein binding
c52889_g3	GO:0030833	biological_process	regulation of actin filament polymerization
c52953_g1	GO:0007155	biological_process	cell adhesion
c52953_g1	GO:0007520	biological_process	myoblast fusion
c52953_g1	GO:0008360	biological_process	regulation of cell shape
c52953_g1	GO:1901739	biological_process	regulation of myoblast fusion
c53020_g1	GO:0006952	biological_process	defense response
c53020_g1	GO:0009793	biological_process	embryo development ending in seed dormancy
c53020_g1	GO:0034389	biological_process	lipid particle organization
c53020_g1	GO:0031408	biological_process	oxylipin biosynthetic process
c53030_g1	GO:0007586	biological_process	digestion
c53043_g1	GO:0006629	biological_process	lipid metabolic process
c53094_g1	GO:0009058	biological_process	biosynthetic process
c53094_g1	GO:0006520	biological_process	cellular amino acid metabolic process
c53094_g1	GO:0006536	biological_process	glutamate metabolic process
c53094_g1	GO:0006559	biological_process	L-phenylalanine catabolic process
c53094_g1	GO:0006572	biological_process	tyrosine catabolic process
c53111_g1	GO:0009083	biological_process	branched-chain amino acid catabolic process
c53111_g1	GO:0034641	biological_process	cellular nitrogen compound metabolic process
c53111_g1	GO:0044281	biological_process	small molecule metabolic process
c53162_g1	GO:0033540	biological_process	fatty acid beta-oxidation using acyl-CoA oxidase
c53162_g1	GO:0019395	biological_process	fatty acid oxidation
c53162_g1	GO:0006091	biological_process	generation of precursor metabolites and energy
c53162_g1	GO:0006629	biological_process	lipid metabolic process
c53162_g1	GO:0006693	biological_process	prostaglandin metabolic process
c53183_g3	GO:0007411	biological_process	axon guidance
c53183_g3	GO:0007298	biological_process	border follicle cell migration
c53183_g3	GO:0045165	biological_process	cell fate commitment
c53183_g3	GO:0033227	biological_process	dsRNA transport
c53183_g3	GO:0007281	biological_process	germ cell development
c53183_g3	GO:0007293	biological_process	germarium-derived egg chamber formation
c53183_g3	GO:0006688	biological_process	glycosphingolipid biosynthetic process
c53183_g3	GO:0042248	biological_process	maintenance of polarity of follicular epithelium
c53183_g3	GO:0008049	biological_process	male courtship behavior
c53183_g3	GO:0097502	biological_process	mannosylation
c53183_g3	GO:0016333	biological_process	morphogenesis of follicular epithelium
c53183_g3	GO:0045434	biological_process	negative regulation of female receptivity, post-mating
c53183_g3	GO:0030720	biological_process	oocyte localization involved in germarium-derived egg chamber formation
c53183_g3	GO:0016325	biological_process	oocyte microtubule cytoskeleton organization
c53183_g3	GO:0048477	biological_process	oogenesis
c53183_g3	GO:0001744	biological_process	optic lobe placode formation
c53183_g3	GO:0030707	biological_process	ovarian follicle cell development
c53183_g3	GO:0007299	biological_process	ovarian follicle cell-cell adhesion
c53183_g3	GO:0048935	biological_process	peripheral nervous system neuron development
c53183_g3	GO:0046662	biological_process	regulation of oviposition
c53198_g1	GO:0006635	biological_process	fatty acid beta-oxidation
c53205_g1	GO:0007586	biological_process	digestion
[truncated: 12,238 more rows]

## Sheet: Sheet1
Unigenes	GO ID	TYPE	Description
c2961_g1	GO:0006865	biological_process	amino acid transport
c2961_g1	GO:0080143	biological_process	regulation of amino acid export
c4114_g1	GO:0042545	biological_process	cell wall modification
c4114_g1	GO:0045490	biological_process	pectin catabolic process
c5849_g1	GO:0006351	biological_process	transcription, DNA-templated
c7945_g1	GO:0042744	biological_process	hydrogen peroxide catabolic process
c7945_g1	GO:0042744	biological_process	hydrogen peroxide catabolic process
c10986_g1	GO:0009738	biological_process	abscisic acid-activated signaling pathway
c19374_g1	GO:0006950	biological_process	response to stress
c19374_g1	GO:0009228	biological_process	thiamine biosynthetic process
c19374_g1	GO:0052837	biological_process	thiazole biosynthetic process
c26578_g1	GO:0006950	biological_process	response to stress
c26578_g1	GO:0005992	biological_process	trehalose biosynthetic process
c26578_g1	GO:0006950	biological_process	response to stress
c26578_g1	GO:0005992	biological_process	trehalose biosynthetic process
c26578_g1	GO:0006950	biological_process	response to stress
c26578_g1	GO:0005992	biological_process	trehalose biosynthetic process
c34641_g1	GO:0055114	biological_process	oxidation-reduction process
c45235_g1	GO:0042742	biological_process	defense response to bacterium
c45235_g1	GO:0045892	biological_process	negative regulation of transcription, DNA-templated
c45235_g1	GO:0010112	biological_process	regulation of systemic acquired resistance
c47855_g1	GO:0009718	biological_process	anthocyanin-containing compound biosynthetic process
c48057_g1	GO:0006952	biological_process	defense response
c48057_g1	GO:0051865	biological_process	protein autoubiquitination
c48057_g1	GO:0016567	biological_process	protein ubiquitination
c48057_g1	GO:0002679	biological_process	respiratory burst involved in defense response
c48057_g1	GO:0010200	biological_process	response to chitin
c48057_g1	GO:0009414	biological_process	response to water deprivation
c48109_g1	GO:0006032	biological_process	chitin catabolic process
c48109_g1	GO:0000272	biological_process	polysaccharide catabolic process
c49537_g1	GO:0009269	biological_process	response to desiccation
c49858_g1	GO:0034219	biological_process	carbohydrate transmembrane transport
c49965_g1	GO:0009873	biological_process	ethylene-activated signaling pathway
c49965_g1	GO:0006351	biological_process	transcription, DNA-templated
c49965_g1	GO:0009873	biological_process	ethylene-activated signaling pathway
c49965_g1	GO:0006351	biological_process	transcription, DNA-templated
c50232_g1	GO:0009585	biological_process	red, far-red light phototransduction
c50232_g1	GO:0080167	biological_process	response to karrikin
c50232_g1	GO:0010224	biological_process	response to UV-B
c50232_g1	GO:0006351	biological_process	transcription, DNA-templated
c50341_g1	GO:0016132	biological_process	brassinosteroid biosynthetic process
c50341_g1	GO:0006879	biological_process	cellular iron ion homeostasis
c50341_g1	GO:0006826	biological_process	iron ion transport
c50341_g1	GO:0007275	biological_process	multicellular organismal development
c50341_g1	GO:0009647	biological_process	skotomorphogenesis
c50341_g2	GO:0016132	biological_process	brassinosteroid biosynthetic process
c50341_g2	GO:0006879	biological_process	cellular iron ion homeostasis
c50341_g2	GO:0006826	biological_process	iron ion transport
c50341_g2	GO:0007275	biological_process	multicellular organismal development
c50341_g2	GO:0009647	biological_process	skotomorphogenesis
c50341_g2	GO:0016132	biological_process	brassinosteroid biosynthetic process
c50341_g2	GO:0006879	biological_process	cellular iron ion homeostasis
c50341_g2	GO:0006826	biological_process	iron ion transport
c50341_g2	GO:0007275	biological_process	multicellular organismal development
c50341_g2	GO:0009647	biological_process	skotomorphogenesis
c52065_g1	GO:0010585	biological_process	glutamine secretion
c52065_g1	GO:0080143	biological_process	regulation of amino acid export
c52065_g1	GO:0006521	biological_process	regulation of cellular amino acid metabolic process
c52230_g1	GO:0009734	biological_process	auxin-activated signaling pathway
c52230_g1	GO:0009733	biological_process	response to auxin
c52230_g1	GO:0010218	biological_process	response to far red light
c52230_g1	GO:0010114	biological_process	response to red light
c52230_g1	GO:0006351	biological_process	transcription, DNA-templated
c52286_g2	GO:0019722	biological_process	calcium-mediated signaling
c52286_g2	GO:0007267	biological_process	cell-cell signaling
c52949_g1	GO:0006952	biological_process	defense response
c52949_g1	GO:0009693	biological_process	ethylene biosynthetic process
c52949_g1	GO:0006952	biological_process	defense response
c52949_g1	GO:0009693	biological_process	ethylene biosynthetic process
c53738_g1	GO:0005975	biological_process	carbohydrate metabolic process
c53972_g1	GO:0016042	biological_process	lipid catabolic process
c54083_g2	GO:0010270	biological_process	photosystem II oxygen evolving complex assembly
c54083_g2	GO:0010270	biological_process	photosystem II oxygen evolving complex assembly
c54083_g2	GO:0010270	biological_process	photosystem II oxygen evolving complex assembly
c54091_g1	GO:0035264	biological_process	multicellular organism growth
c54091_g1	GO:0045892	biological_process	negative regulation of transcription, DNA-templated
c54091_g1	GO:0010117	biological_process	photoprotection
c54091_g1	GO:0015979	biological_process	photosynthesis
c54091_g1	GO:0009737	biological_process	response to abscisic acid
c54091_g1	GO:0010200	biological_process	response to chitin
c54091_g1	GO:0009409	biological_process	response to cold
c54091_g1	GO:0009644	biological_process	response to high light intensity
c54091_g1	GO:0006979	biological_process	response to oxidative stress
c54091_g1	GO:0009651	biological_process	response to salt stress
c54091_g1	GO:0009414	biological_process	response to water deprivation
c54091_g1	GO:0009611	biological_process	response to wounding
c54091_g1	GO:0006351	biological_process	transcription, DNA-templated
c54091_g1	GO:0035264	biological_process	multicellular organism growth
c54091_g1	GO:0045892	biological_process	negative regulation of transcription, DNA-templated
c54091_g1	GO:0010117	biological_process	photoprotection
c54091_g1	GO:0015979	biological_process	photosynthesis
c54091_g1	GO:0009737	biological_process	response to abscisic acid
c54091_g1	GO:0010200	biological_process	response to chitin
c54091_g1	GO:0009409	biological_process	response to cold
c54091_g1	GO:0009644	biological_process	response to high light intensity
c54091_g1	GO:0006979	biological_process	response to oxidative stress
c54091_g1	GO:0009651	biological_process	response to salt stress
c54091_g1	GO:0009414	biological_process	response to water deprivation
c54091_g1	GO:0009611	biological_process	response to wounding
c54091_g1	GO:0006351	biological_process	transcription, DNA-templated
c54165_g1	GO:0006629	biological_process	lipid metabolic process
c54165_g1	GO:0006629	biological_process	lipid metabolic process
c54165_g1	GO:0006629	biological_process	lipid metabolic process
c54165_g1	GO:0006629	biological_process	lipid metabolic process
c54165_g1	GO:0006629	biological_process	lipid metabolic process
c54281_g2	GO:0030245	biological_process	cellulose catabolic process
c54281_g2	GO:0030245	biological_process	cellulose catabolic process
c54281_g2	GO:0030245	biological_process	cellulose catabolic process
c54285_g1	GO:0071483	biological_process	cellular response to blue light
c54285_g1	GO:0071490	biological_process	cellular response to far red light
c54285_g1	GO:0034605	biological_process	cellular response to heat
c54285_g1	GO:0071486	biological_process	cellular response to high light intensity
c54285_g1	GO:0071491	biological_process	cellular response to red light
c54285_g1	GO:0071492	biological_process	cellular response to UV-A
c54285_g1	GO:0010117	biological_process	photoprotection
c54285_g1	GO:0015979	biological_process	photosynthesis
c54285_g1	GO:0010030	biological_process	positive regulation of seed germination
c54285_g1	GO:0010380	biological_process	regulation of chlorophyll biosynthetic process
c54285_g1	GO:0009409	biological_process	response to cold
c54285_g1	GO:0080167	biological_process	response to karrikin
c54285_g1	GO:0071483	biological_process	cellular response to blue light
c54285_g1	GO:0071490	biological_process	cellular response to far red light
c54285_g1	GO:0034605	biological_process	cellular response to heat
c54285_g1	GO:0071486	biological_process	cellular response to high light intensity
c54285_g1	GO:0071491	biological_process	cellular response to red light
c54285_g1	GO:0071492	biological_process	cellular response to UV-A
c54285_g1	GO:0010117	biological_process	photoprotection
c54285_g1	GO:0015979	biological_process	photosynthesis
c54285_g1	GO:0010030	biological_process	positive regulation of seed germination
c54285_g1	GO:0010380	biological_process	regulation of chlorophyll biosynthetic process
c54285_g1	GO:0009409	biological_process	response to cold
c54285_g1	GO:0080167	biological_process	response to karrikin
c54342_g2	GO:0010252	biological_process	auxin homeostasis
c54342_g2	GO:0009734	biological_process	auxin-activated signaling pathway
c54342_g2	GO:0080162	biological_process	intracellular auxin transport
c54342_g2	GO:0009555	biological_process	pollen development
c54342_g2	GO:0010252	biological_process	auxin homeostasis
c54342_g2	GO:0009734	biological_process	auxin-activated signaling pathway
c54342_g2	GO:0080162	biological_process	intracellular auxin transport
c54342_g2	GO:0009555	biological_process	pollen development
c54342_g2	GO:0010252	biological_process	auxin homeostasis
c54342_g2	GO:0009734	biological_process	auxin-activated signaling pathway
c54342_g2	GO:0080162	biological_process	intracellular auxin transport
c54342_g2	GO:0009555	biological_process	pollen development
c54947_g1	GO:0000077	biological_process	DNA damage checkpoint
c54947_g1	GO:0040020	biological_process	regulation of meiosis
c54947_g1	GO:0010332	biological_process	response to gamma radiation
c54947_g1	GO:0006351	biological_process	transcription, DNA-templated
c54947_g1	GO:0000077	biological_process	DNA damage checkpoint
c54947_g1	GO:0040020	biological_process	regulation of meiosis
c54947_g1	GO:0010332	biological_process	response to gamma radiation
c54947_g1	GO:0006351	biological_process	transcription, DNA-templated
c54947_g1	GO:0000077	biological_process	DNA damage checkpoint
c54947_g1	GO:0040020	biological_process	regulation of meiosis
c54947_g1	GO:0010332	biological_process	response to gamma radiation
c54947_g1	GO:0006351	biological_process	transcription, DNA-templated
c55244_g1	GO:0009607	biological_process	response to biotic stimulus
c55244_g1	GO:0016068	biological_process	type I hypersensitivity
c55244_g1	GO:0009607	biological_process	response to biotic stimulus
c55244_g1	GO:0016068	biological_process	type I hypersensitivity
c55723_g1	GO:0052325	biological_process	cell wall pectin biosynthetic process
c55723_g1	GO:0010345	biological_process	suberin biosynthetic process
c55723_g1	GO:0052325	biological_process	cell wall pectin biosynthetic process
c55723_g1	GO:0010345	biological_process	suberin biosynthetic process
c55916_g1	GO:0006334	biological_process	nucleosome assembly
c55916_g1	GO:0006281	biological_process	DNA repair
c55916_g1	GO:0006334	biological_process	nucleosome assembly
c55916_g1	GO:0006334	biological_process	nucleosome assembly
c55916_g1	GO:0006281	biological_process	DNA repair
c55916_g1	GO:0006334	biological_process	nucleosome assembly
c56007_g3	GO:0046274	biological_process	lignin catabolic process
c56007_g3	GO:0046688	biological_process	response to copper ion
c56007_g3	GO:0010228	biological_process	vegetative to reproductive phase transition of meristem
c56229_g1	GO:0042742	biological_process	defense response to bacterium
c56229_g1	GO:0019253	biological_process	reductive pentose-phosphate cycle
c56229_g1	GO:0009409	biological_process	response to cold
c56240_g2	GO:0010286	biological_process	heat acclimation
c56240_g2	GO:0030001	biological_process	metal ion transport
c56240_g2	GO:0010286	biological_process	heat acclimation
c56240_g2	GO:0030001	biological_process	metal ion transport
c56446_g1	GO:0052576	biological_process	carbohydrate storage
c56446_g1	GO:0070417	biological_process	cellular response to cold
c56446_g1	GO:0006012	biological_process	galactose metabolic process
c56446_g1	GO:0008152	biological_process	metabolic process
c56446_g1	GO:0010325	biological_process	raffinose family oligosaccharide biosynthetic process
c56493_g1	GO:0055114	biological_process	oxidation-reduction process
c56493_g1	GO:0055070	biological_process	copper ion homeostasis
c56493_g1	GO:0017148	biological_process	negative regulation of translation
c56493_g1	GO:0055114	biological_process	oxidation-reduction process
c56493_g1	GO:0046688	biological_process	response to copper ion
c56493_g1	GO:0009411	biological_process	response to UV
c56531_g1	GO:0006833	biological_process	water transport
c56753_g1	GO:0009686	biological_process	gibberellin biosynthetic process
c56753_g1	GO:0009686	biological_process	gibberellin biosynthetic process
c56753_g1	GO:0009686	biological_process	gibberellin biosynthetic process
c56790_g1	GO:0006865	biological_process	amino acid transport
c56790_g1	GO:0006865	biological_process	amino acid transport
c56790_g1	GO:0015803	biological_process	branched-chain amino acid transport
c56790_g1	GO:0006812	biological_process	cation transport
c56790_g1	GO:0006868	biological_process	glutamine transport
c56790_g1	GO:1902475	biological_process	L-alpha-amino acid transmembrane transport
c56790_g1	GO:0015807	biological_process	L-amino acid transport
c56790_g1	GO:0015804	biological_process	neutral amino acid transport
c56790_g1	GO:0015828	biological_process	tyrosine transport
c56790_g1	GO:0007034	biological_process	vacuolar transport
c56790_g1	GO:0006865	biological_process	amino acid transport
c56790_g1	GO:0006865	biological_process	amino acid transport
c56790_g1	GO:0015803	biological_process	branched-chain amino acid transport
c56790_g1	GO:0006812	biological_process	cation transport
c56790_g1	GO:0006868	biological_process	glutamine transport
c56790_g1	GO:1902475	biological_process	L-alpha-amino acid transmembrane transport
c56790_g1	GO:0015807	biological_process	L-amino acid transport
c56790_g1	GO:0015804	biological_process	neutral amino acid transport
c56790_g1	GO:0015828	biological_process	tyrosine transport
c56790_g1	GO:0007034	biological_process	vacuolar transport
c56831_g1	GO:0034219	biological_process	carbohydrate transmembrane transport
c56831_g1	GO:0034219	biological_process	carbohydrate transmembrane transport
c56901_g7	GO:0009556	biological_process	microsporogenesis
c56901_g7	GO:0009555	biological_process	pollen development
c56901_g7	GO:0009786	biological_process	regulation of asymmetric cell division
c56901_g7	GO:0009556	biological_process	microsporogenesis
c56901_g7	GO:0009555	biological_process	pollen development
c56901_g7	GO:0009786	biological_process	regulation of asymmetric cell division
c57132_g1	GO:0006520	biological_process	cellular amino acid metabolic process
c57132_g1	GO:0009252	biological_process	peptidoglycan biosynthetic process
c57132_g1	GO:0008360	biological_process	regulation of cell shape
c57132_g1	GO:0030435	biological_process	sporulation resulting in formation of a cellular spore
c57132_g1	GO:0006520	biological_process	cellular amino acid metabolic process
c57132_g1	GO:0009252	biological_process	peptidoglycan biosynthetic process
c57132_g1	GO:0008360	biological_process	regulation of cell shape
c57132_g1	GO:0030435	biological_process	sporulation resulting in formation of a cellular spore
c57359_g1	GO:0080001	biological_process	mucilage extrusion from seed coat
c57359_g1	GO:0048359	biological_process	mucilage metabolic process involved in seed coat development
c57359_g1	GO:0043086	biological_process	negative regulation of catalytic activity
c57359_g1	GO:0010214	biological_process	seed coat development
c57359_g1	GO:0080001	biological_process	mucilage extrusion from seed coat
c57359_g1	GO:0048359	biological_process	mucilage metabolic process involved in seed coat development
c57359_g1	GO:0043086	biological_process	negative regulation of catalytic activity
c57359_g1	GO:0010214	biological_process	seed coat development
c57697_g1	GO:0009908	biological_process	flower development
c57697_g1	GO:0009740	biological_process	gibberellic acid mediated signaling pathway
c57697_g1	GO:0009686	biological_process	gibberellin biosynthetic process
c57697_g1	GO:0048366	biological_process	leaf development
c57697_g1	GO:0009739	biological_process	response to gibberellin
c57697_g1	GO:0048575	biological_process	short-day photoperiodism, flowering
c57697_g1	GO:0009826	biological_process	unidimensional cell growth
c57697_g1	GO:0009908	biological_process	flower development
c57697_g1	GO:0009740	biological_process	gibberellic acid mediated signaling pathway
c57697_g1	GO:0009686	biological_process	gibberellin biosynthetic process
c57697_g1	GO:0048366	biological_process	leaf development
c57697_g1	GO:0009739	biological_process	response to gibberellin
c57697_g1	GO:0048575	biological_process	short-day photoperiodism, flowering
c57697_g1	GO:0009826	biological_process	unidimensional cell growth
c57697_g1	GO:0009908	biological_process	flower development
c57697_g1	GO:0009740	biological_process	gibberellic acid mediated signaling pathway
c57697_g1	GO:0009686	biological_process	gibberellin biosynthetic process
c57697_g1	GO:0048366	biological_process	leaf development
c57697_g1	GO:0009739	biological_process	response to gibberellin
c57697_g1	GO:0048575	biological_process	short-day photoperiodism, flowering
c57697_g1	GO:0009826	biological_process	unidimensional cell growth
c58000_g1	GO:0006952	biological_process	defense response
c58000_g1	GO:0051707	biological_process	response to other organism
c58000_g1	GO:0009611	biological_process	response to wounding
c58019_g1	GO:0042128	biological_process	nitrate assimilation
c58019_g2	GO:0042128	biological_process	nitrate assimilation
c58019_g2	GO:0042128	biological_process	nitrate assimilation
c58031_g1	GO:0016567	biological_process	protein ubiquitination
c58031_g1	GO:0010029	biological_process	regulation of seed germination
c58031_g1	GO:0016567	biological_process	protein ubiquitination
c58031_g1	GO:0010029	biological_process	regulation of seed germination
c58299_g4	GO:0006952	biological_process	defense response
c58299_g4	GO:0009607	biological_process	response to biotic stimulus
c58299_g4	GO:0006952	biological_process	defense response
c58299_g4	GO:0009607	biological_process	response to biotic stimulus
c58299_g4	GO:0006952	biological_process	defense response
c58299_g4	GO:0009607	biological_process	response to biotic stimulus
c58299_g4	GO:0006952	biological_process	defense response
c58299_g4	GO:0009607	biological_process	response to biotic stimulus
c58299_g4	GO:0006952	biological_process	defense response
c58299_g4	GO:0009607	biological_process	response to biotic stimulus
c58339_g2	GO:0006281	biological_process	DNA repair
c58339_g2	GO:0007143	biological_process	female meiotic division
c58339_g2	GO:0007140	biological_process	male meiosis
c58339_g2	GO:0009555	biological_process	pollen development
c58339_g2	GO:0010165	biological_process	response to X-ray
c58339_g2	GO:0006281	biological_process	DNA repair
c58339_g2	GO:0007143	biological_process	female meiotic division
c58339_g2	GO:0007140	biological_process	male meiosis
c58339_g2	GO:0009555	biological_process	pollen development
c58339_g2	GO:0010165	biological_process	response to X-ray
c58414_g1	GO:0006310	biological_process	DNA recombination
c58414_g1	GO:0006281	biological_process	DNA repair
c58414_g1	GO:0016567	biological_process	protein ubiquitination
c58414_g1	GO:0010332	biological_process	response to gamma radiation
c58414_g1	GO:0006310	biological_process	DNA recombination
c58414_g1	GO:0006281	biological_process	DNA repair
c58414_g1	GO:0016567	biological_process	protein ubiquitination
c58414_g1	GO:0010332	biological_process	response to gamma radiation
c58659_g1	GO:0042617	biological_process	paclitaxel biosynthetic process
c58870_g1	GO:0005975	biological_process	carbohydrate metabolic process
c58870_g1	GO:0005975	biological_process	carbohydrate metabolic process
c58870_g1	GO:0005975	biological_process	carbohydrate metabolic process
c58953_g1	GO:0009926	biological_process	auxin polar transport
c58953_g1	GO:0016121	biological_process	carotene catabolic process
c58953_g1	GO:0009965	biological_process	leaf morphogenesis
c58953_g1	GO:0009733	biological_process	response to auxin
c58953_g1	GO:0010223	biological_process	secondary shoot formation
c58953_g1	GO:1901601	biological_process	strigolactone biosynthetic process
c58953_g1	GO:0016124	biological_process	xanthophyll catabolic process
c58953_g1	GO:0009926	biological_process	auxin polar transport
c58953_g1	GO:0016121	biological_process	carotene catabolic process
c58953_g1	GO:0009965	biological_process	leaf morphogenesis
c58953_g1	GO:0009733	biological_process	response to auxin
c58953_g1	GO:0010223	biological_process	secondary shoot formation
c58953_g1	GO:1901601	biological_process	strigolactone biosynthetic process
c58953_g1	GO:0016124	biological_process	xanthophyll catabolic process
c58953_g1	GO:0009926	biological_process	auxin polar transport
c58953_g1	GO:0016121	biological_process	carotene catabolic process
c58953_g1	GO:0009965	biological_process	leaf morphogenesis
c58953_g1	GO:0009733	biological_process	response to auxin
c58953_g1	GO:0010223	biological_process	secondary shoot formation
c58953_g1	GO:1901601	biological_process	strigolactone biosynthetic process
c58953_g1	GO:0016124	biological_process	xanthophyll catabolic process
c58953_g1	GO:0009926	biological_process	auxin polar transport
c58953_g1	GO:0016121	biological_process	carotene catabolic process
c58953_g1	GO:0009965	biological_process	leaf morphogenesis
c58953_g1	GO:0009733	biological_process	response to auxin
c58953_g1	GO:0010223	biological_process	secondary shoot formation
c58953_g1	GO:1901601	biological_process	strigolactone biosynthetic process
c58953_g1	GO:0016124	biological_process	xanthophyll catabolic process
c58954_g5	GO:0006094	biological_process	gluconeogenesis
c58954_g5	GO:0006094	biological_process	gluconeogenesis
c58967_g2	GO:0030183	biological_process	B cell differentiation
c58967_g2	GO:0007596	biological_process	blood coagulation
c58967_g2	GO:0006816	biological_process	calcium ion transport
c58967_g2	GO:0006338	biological_process	chromatin remodeling
c58967_g2	GO:0048566	biological_process	embryonic digestive tract development
c58967_g2	GO:0000082	biological_process	G1/S transition of mitotic cell cycle
c58967_g2	GO:0048872	biological_process	homeostasis of number of cells
c58967_g2	GO:0001701	biological_process	in utero embryonic development
c58967_g2	GO:0000122	biological_process	negative regulation of transcription from RNA polymerase II promoter
c58967_g2	GO:0045892	biological_process	negative regulation of transcription, DNA-templated
c58967_g2	GO:0051571	biological_process	positive regulation of histone H3-K4 methylation
c58967_g2	GO:0051574	biological_process	positive regulation of histone H3-K9 methylation
c58967_g2	GO:0045624	biological_process	positive regulation of T-helper cell differentiation
c58967_g2	GO:0045944	biological_process	positive regulation of transcription from RNA polymerase II promoter
c58967_g2	GO:0045893	biological_process	positive regulation of transcription, DNA-templated
c58967_g2	GO:0006355	biological_process	regulation of transcription, DNA-templated
c58967_g2	GO:0048538	biological_process	thymus development
c58967_g2	GO:0006351	biological_process	transcription, DNA-templated
c58967_g2	GO:0006355	biological_process	regulation of transcription, DNA-templated
c59291_g1	GO:0015979	biological_process	photosynthesis
c59291_g1	GO:0042549	biological_process	photosystem II stabilization
c59291_g1	GO:0015979	biological_process	photosynthesis
c59291_g1	GO:0042549	biological_process	photosystem II stabilization
c59291_g1	GO:0015979	biological_process	photosynthesis
c59291_g1	GO:0042549	biological_process	photosystem II stabilization
c59291_g1	GO:0015979	biological_process	photosynthesis
c59291_g1	GO:0042549	biological_process	photosystem II stabilization
c59291_g1	GO:0015979	biological_process	photosynthesis
c59291_g1	GO:0042549	biological_process	photosystem II stabilization
c59306_g2	GO:0006355	biological_process	regulation of transcription, DNA-templated
c59306_g2	GO:0006351	biological_process	transcription, DNA-templated
c59306_g2	GO:0006355	biological_process	regulation of transcription, DNA-templated
c59306_g2	GO:0006351	biological_process	transcription, DNA-templated
c59650_g3	GO:0035264	biological_process	multicellular organism growth
c59650_g3	GO:0045892	biological_process	negative regulation of transcription, DNA-templated
c59650_g3	GO:0010117	biological_process	photoprotection
c59650_g3	GO:0015979	biological_process	photosynthesis
c59650_g3	GO:0009737	biological_process	response to abscisic acid
c59650_g3	GO:0010200	biological_process	response to chitin
c59650_g3	GO:0009409	biological_process	response to cold
c59650_g3	GO:0009644	biological_process	response to high light intensity
c59650_g3	GO:0006979	biological_process	response to oxidative stress
c59650_g3	GO:0009651	biological_process	response to salt stress
c59650_g3	GO:0009414	biological_process	response to water deprivation
c59650_g3	GO:0009611	biological_process	response to wounding
c59650_g3	GO:0006351	biological_process	transcription, DNA-templated
c59706_g2	GO:0000272	biological_process	polysaccharide catabolic process
c59709_g1	GO:0008283	biological_process	cell proliferation
c59709_g1	GO:0010229	biological_process	inflorescence development
c59709_g1	GO:0031347	biological_process	regulation of defense response
c59709_g1	GO:0010029	biological_process	regulation of seed germination
c59709_g1	GO:0006355	biological_process	regulation of transcription, DNA-templated
c59709_g1	GO:0009737	biological_process	response to abscisic acid
c59709_g1	GO:0009735	biological_process	response to cytokinin
c59709_g1	GO:0009739	biological_process	response to gibberellin
c59709_g1	GO:0006351	biological_process	transcription, DNA-templated
c59890_g1	GO:0009626	biological_process	plant-type hypersensitive response
c59890_g1	GO:0009626	biological_process	plant-type hypersensitive response
c60188_g4	GO:0009873	biological_process	ethylene-activated signaling pathway
c60188_g4	GO:0009864	biological_process	induced systemic resistance, jasmonic acid mediated signaling pathway
c60188_g4	GO:0045893	biological_process	positive regulation of transcription, DNA-templated
c60188_g4	GO:0010200	biological_process	response to chitin
c60188_g4	GO:0006351	biological_process	transcription, DNA-templated
c60188_g4	GO:0006952	biological_process	defense response
c60188_g4	GO:0009873	biological_process	ethylene-activated signaling pathway
c60188_g4	GO:0006351	biological_process	transcription, DNA-templated
c60370_g4	GO:0015743	biological_process	malate transport
c60370_g5	GO:0015743	biological_process	malate transport
c60370_g5	GO:0015743	biological_process	malate transport
c60370_g5	GO:0015743	biological_process	malate transport
c60370_g5	GO:0015743	biological_process	malate transport
c60370_g5	GO:0015743	biological_process	malate transport
c60495_g1	GO:0006952	biological_process	defense response
c60495_g1	GO:0006629	biological_process	lipid metabolic process
c60495_g1	GO:0006952	biological_process	defense response
c60495_g1	GO:0006629	biological_process	lipid metabolic process
c60495_g1	GO:0006952	biological_process	defense response
c60495_g1	GO:0006629	biological_process	lipid metabolic process
c60495_g1	GO:0006952	biological_process	defense response
c60495_g1	GO:0006629	biological_process	lipid metabolic process
c60499_g2	GO:0005975	biological_process	carbohydrate metabolic process
c60499_g2	GO:0005975	biological_process	carbohydrate metabolic process
c60499_g2	GO:0005975	biological_process	carbohydrate metabolic process
c60499_g2	GO:0005975	biological_process	carbohydrate metabolic process
c60499_g2	GO:0005975	biological_process	carbohydrate metabolic process
c60499_g2	GO:0005975	biological_process	carbohydrate metabolic process
c60499_g2	GO:0005975	biological_process	carbohydrate metabolic process
c60499_g2	GO:0005975	biological_process	carbohydrate metabolic process
c60867_g1	GO:0055114	biological_process	oxidation-reduction process
c60867_g1	GO:0055114	biological_process	oxidation-reduction process
c60867_g1	GO:0055114	biological_process	oxidation-reduction process
c60867_g1	GO:0015690	biological_process	aluminum cation transport
c60867_g1	GO:0050832	biological_process	defense response to fungus
c60867_g1	GO:0055114	biological_process	oxidation-reduction process
c60867_g1	GO:0009646	biological_process	response to absence of light
c60867_g1	GO:0006979	biological_process	response to oxidative stress
c60966_g1	GO:0009738	biological_process	abscisic acid-activated signaling pathway
c60966_g1	GO:0010150	biological_process	leaf senescence
c60966_g1	GO:0009737	biological_process	response to abscisic acid
c60966_g1	GO:0009409	biological_process	response to cold
c60966_g1	GO:0009651	biological_process	response to salt stress
c60966_g1	GO:0009414	biological_process	response to water deprivation
c60966_g1	GO:0009738	biological_process	abscisic acid-activated signaling pathway
c60966_g1	GO:0010150	biological_process	leaf senescence
c60966_g1	GO:0009737	biological_process	response to abscisic acid
c60966_g1	GO:0009409	biological_process	response to cold
c60966_g1	GO:0009651	biological_process	response to salt stress
c60966_g1	GO:0009414	biological_process	response to water deprivation
c60966_g1	GO:0009738	biological_process	abscisic acid-activated signaling pathway
c60966_g1	GO:0010150	biological_process	leaf senescence
c60966_g1	GO:0009737	biological_process	response to abscisic acid
c60966_g1	GO:0009409	biological_process	response to cold
c60966_g1	GO:0009651	biological_process	response to salt stress
c60966_g1	GO:0009414	biological_process	response to water deprivation
c60966_g1	GO:0009738	biological_process	abscisic acid-activated signaling pathway
c60966_g1	GO:0010150	biological_process	leaf senescence
c60966_g1	GO:0009737	biological_process	response to abscisic acid
c60966_g1	GO:0009409	biological_process	response to cold
c60966_g1	GO:0009651	biological_process	response to salt stress
c60966_g1	GO:0009414	biological_process	response to water deprivation
c60966_g1	GO:0009738	biological_process	abscisic acid-activated signaling pathway
c60966_g1	GO:0010150	biological_process	leaf senescence
c60966_g1	GO:0009737	biological_process	response to abscisic acid
c60966_g1	GO:0009409	biological_process	response to cold
c60966_g1	GO:0009651	biological_process	response to salt stress
c60966_g1	GO:0009414	biological_process	response to water deprivation
c60977_g1	GO:0006006	biological_process	glucose metabolic process
c60977_g1	GO:0019253	biological_process	reductive pentose-phosphate cycle
c60988_g1	GO:0048316	biological_process	seed development
c60992_g1	GO:0016311	biological_process	dephosphorylation
c60992_g1	GO:0006206	biological_process	pyrimidine nucleobase metabolic process
c60992_g1	GO:0016311	biological_process	dephosphorylation
c60992_g1	GO:0006206	biological_process	pyrimidine nucleobase metabolic process
c61412_g4	GO:0016132	biological_process	brassinosteroid biosynthetic process
c61412_g4	GO:0009867	biological_process	jasmonic acid mediated signaling pathway
c61412_g4	GO:0048366	biological_process	leaf development
c61412_g4	GO:0010358	biological_process	leaf shaping
c61412_g4	GO:0009741	biological_process	response to brassinosteroid
c61412_g4	GO:0009753	biological_process	response to jasmonic acid
c61412_g4	GO:0009826	biological_process	unidimensional cell growth
c61490_g2	GO:0010234	biological_process	anther wall tapetum cell fate specification
c61490_g2	GO:0007126	biological_process	meiotic nuclear division
c61490_g2	GO:0009556	biological_process	microsporogenesis
c61490_g2	GO:0010234	biological_process	anther wall tapetum cell fate specification
c61490_g2	GO:0007126	biological_process	meiotic nuclear division
c61490_g2	GO:0009556	biological_process	microsporogenesis
c61490_g2	GO:0010234	biological_process	anther wall tapetum cell fate specification
c61490_g2	GO:0007126	biological_process	meiotic nuclear division
c61490_g2	GO:0009556	biological_process	microsporogenesis
c61579_g3	GO:0015031	biological_process	protein transport
c61762_g2	GO:0080055	biological_process	low affinity nitrate transport
c61762_g2	GO:0042128	biological_process	nitrate assimilation
c61762_g2	GO:0015706	biological_process	nitrate transport
c61772_g2	GO:0009820	biological_process	alkaloid metabolic process
c61863_g2	GO:0016117	biological_process	carotenoid biosynthetic process
c61863_g2	GO:0009635	biological_process	response to herbicide
c61863_g2	GO:0016117	biological_process	carotenoid biosynthetic process
c61863_g2	GO:0009635	biological_process	response to herbicide
c61915_g2	GO:0010161	biological_process	red light signaling pathway
c61915_g2	GO:0010099	biological_process	regulation of photomorphogenesis
c61915_g2	GO:0006355	biological_process	regulation of transcription, DNA-templated
c61915_g2	GO:0010161	biological_process	red light signaling pathway
c61915_g2	GO:0010099	biological_process	regulation of photomorphogenesis
c61915_g2	GO:0006355	biological_process	regulation of transcription, DNA-templated
c62002_g1	GO:0005975	biological_process	carbohydrate metabolic process
c62002_g1	GO:0006952	biological_process	defense response
c62002_g1	GO:0005975	biological_process	carbohydrate metabolic process
c62002_g1	GO:0006952	biological_process	defense response
c62002_g1	GO:0005975	biological_process	carbohydrate metabolic process
c62002_g1	GO:0006952	biological_process	defense response
c62209_g3	GO:0080001	biological_process	mucilage extrusion from seed coat
c62209_g3	GO:0048359	biological_process	mucilage metabolic process involved in seed coat development
c62209_g3	GO:0043086	biological_process	negative regulation of catalytic activity
c62209_g3	GO:0010214	biological_process	seed coat development
c62209_g3	GO:0080001	biological_process	mucilage extrusion from seed coat
c62209_g3	GO:0048359	biological_process	mucilage metabolic process involved in seed coat development
c62209_g3	GO:0043086	biological_process	negative regulation of catalytic activity
c62209_g3	GO:0010214	biological_process	seed coat development
c62209_g3	GO:0080001	biological_process	mucilage extrusion from seed coat
c62209_g3	GO:0048359	biological_process	mucilage metabolic process involved in seed coat development
c62209_g3	GO:0043086	biological_process	negative regulation of catalytic activity
c62209_g3	GO:0010214	biological_process	seed coat development
c62347_g5	GO:0042128	biological_process	nitrate assimilation
c62536_g2	GO:0009688	biological_process	abscisic acid biosynthetic process
c62536_g2	GO:0006950	biological_process	response to stress
c63436_g1	GO:0006950	biological_process	response to stress
c63805_g3	GO:0015979	biological_process	photosynthesis
c63805_g3	GO:0042742	biological_process	defense response to bacterium
c63805_g3	GO:0019684	biological_process	photosynthesis, light reaction
c63805_g3	GO:0015979	biological_process	photosynthesis
c63805_g3	GO:0015979	biological_process	photosynthesis
c63805_g3	GO:0015979	biological_process	photosynthesis
c63805_g3	GO:0042742	biological_process	defense response to bacterium
c63805_g3	GO:0015979	biological_process	photosynthesis
c63805_g3	GO:0015979	biological_process	photosynthesis
c63805_g3	GO:0015979	biological_process	photosynthesis
c63805_g3	GO:0042742	biological_process	defense response to bacterium
c63805_g3	GO:0019684	biological_process	photosynthesis, light reaction
c63805_g3	GO:0015979	biological_process	photosynthesis
c63853_g1	GO:0009658	biological_process	chloroplast organization
c63853_g1	GO:0009909	biological_process	regulation of flower development
c63853_g1	GO:0006351	biological_process	transcription, DNA-templated
c63853_g1	GO:0009658	biological_process	chloroplast organization
c63853_g1	GO:0009909	biological_process	regulation of flower development
c63853_g1	GO:0006351	biological_process	transcription, DNA-templated
c63853_g1	GO:0009658	biological_process	chloroplast organization
c63853_g1	GO:0009909	biological_process	regulation of flower development
c63853_g1	GO:0006351	biological_process	transcription, DNA-templated
c63853_g1	GO:0009658	biological_process	chloroplast organization
c63853_g1	GO:0009909	biological_process	regulation of flower development
c63853_g1	GO:0006351	biological_process	transcription, DNA-templated
c64158_g1	GO:0015743	biological_process	malate transport
c64158_g1	GO:0015743	biological_process	malate transport
c64158_g1	GO:0015743	biological_process	malate transport
c64158_g1	GO:0015743	biological_process	malate transport
c64158_g1	GO:0015743	biological_process	malate transport
c64158_g1	GO:0015743	biological_process	malate transport
c64378_g2	GO:0009738	biological_process	abscisic acid-activated signaling pathway
c64378_g2	GO:0045893	biological_process	positive regulation of transcription, DNA-templated
c64378_g2	GO:0009737	biological_process	response to abscisic acid
c64378_g2	GO:0009414	biological_process	response to water deprivation
c64378_g2	GO:0006351	biological_process	transcription, DNA-templated
c64378_g2	GO:0009738	biological_process	abscisic acid-activated signaling pathway
c64378_g2	GO:0045893	biological_process	positive regulation of transcription, DNA-templated
c64378_g2	GO:0009737	biological_process	response to abscisic acid
c64378_g2	GO:0009414	biological_process	response to water deprivation
c64378_g2	GO:0006351	biological_process	transcription, DNA-templated
c64378_g2	GO:0009738	biological_process	abscisic acid-activated signaling pathway
c64378_g2	GO:0045893	biological_process	positive regulation of transcription, DNA-templated
c64378_g2	GO:0009737	biological_process	response to abscisic acid
c64378_g2	GO:0009414	biological_process	response to water deprivation
c64378_g2	GO:0006351	biological_process	transcription, DNA-templated
c64378_g2	GO:0009738	biological_process	abscisic acid-activated signaling pathway
c64378_g2	GO:0045893	biological_process	positive regulation of transcription, DNA-templated
c64378_g2	GO:0009737	biological_process	response to abscisic acid
c64378_g2	GO:0009414	biological_process	response to water deprivation
c64378_g2	GO:0006351	biological_process	transcription, DNA-templated
c64461_g5	GO:0006351	biological_process	transcription, DNA-templated
c64461_g5	GO:0006351	biological_process	transcription, DNA-templated
c64461_g5	GO:0009908	biological_process	flower development
c64461_g5	GO:0010077	biological_process	maintenance of inflorescence meristem identity
c64461_g5	GO:0009911	biological_process	positive regulation of flower development
c64461_g5	GO:0045893	biological_process	positive regulation of transcription, DNA-templated
c64461_g5	GO:0000060	biological_process	protein import into nucleus, translocation
c64461_g5	GO:0009409	biological_process	response to cold
c64461_g5	GO:0009739	biological_process	response to gibberellin
c64461_g5	GO:0006351	biological_process	transcription, DNA-templated
c64461_g5	GO:0009908	biological_process	flower development
c64461_g5	GO:0010077	biological_process	maintenance of inflorescence meristem identity
c64461_g5	GO:0009911	biological_process	positive regulation of flower development
c64461_g5	GO:0045893	biological_process	positive regulation of transcription, DNA-templated
c64461_g5	GO:0000060	biological_process	protein import into nucleus, translocation
c64461_g5	GO:0009409	biological_process	response to cold
c64461_g5	GO:0009739	biological_process	response to gibberellin
c64461_g5	GO:0006351	biological_process	transcription, DNA-templated
c64780_g2	GO:0042744	biological_process	hydrogen peroxide catabolic process
c64780_g2	GO:0048511	biological_process	rhythmic process
c64780_g2	GO:0042744	biological_process	hydrogen peroxide catabolic process
c64780_g2	GO:0048511	biological_process	rhythmic process
c64780_g2	GO:0042744	biological_process	hydrogen peroxide catabolic process
c64780_g2	GO:0048511	biological_process	rhythmic process
c64780_g2	GO:0042744	biological_process	hydrogen peroxide catabolic process
c64780_g2	GO:0048511	biological_process	rhythmic process
c64780_g2	GO:0042744	biological_process	hydrogen peroxide catabolic process
c64780_g2	GO:0048511	biological_process	rhythmic process
c64780_g2	GO:0042744	biological_process	hydrogen peroxide catabolic process
c64780_g2	GO:0048511	biological_process	rhythmic process
c64780_g2	GO:0042744	biological_process	hydrogen peroxide catabolic process
c64780_g2	GO:0048511	biological_process	rhythmic process
c64780_g2	GO:0042744	biological_process	hydrogen peroxide catabolic process
c64780_g2	GO:0048511	biological_process	rhythmic process
c64780_g2	GO:0042744	biological_process	hydrogen peroxide catabolic process
c64780_g2	GO:0048511	biological_process	rhythmic process
c64780_g2	GO:0042744	biological_process	hydrogen peroxide catabolic process
c64780_g2	GO:0048511	biological_process	rhythmic process
c64780_g2	GO:0042744	biological_process	hydrogen peroxide catabolic process
c64780_g2	GO:0048511	biological_process	rhythmic process
c64780_g2	GO:0042744	biological_process	hydrogen peroxide catabolic process
c64780_g2	GO:0048511	biological_process	rhythmic process
c64861_g1	GO:0006096	biological_process	glycolytic process
c64861_g1	GO:0046686	biological_process	response to cadmium ion
c65060_g1	GO:0015995	biological_process	chlorophyll biosynthetic process
c65060_g1	GO:0015979	biological_process	photosynthesis
c65219_g3	GO:0016117	biological_process	carotenoid biosynthetic process
c65219_g3	GO:0016117	biological_process	carotenoid biosynthetic process
c65219_g3	GO:0016117	biological_process	carotenoid biosynthetic process
c65219_g3	GO:0016117	biological_process	carotenoid biosynthetic process
c65775_g1	GO:0016036	biological_process	cellular response to phosphate starvation
c65775_g1	GO:0035435	biological_process	phosphate ion transmembrane transport
c65775_g1	GO:0016036	biological_process	cellular response to phosphate starvation
c65775_g1	GO:0035435	biological_process	phosphate ion transmembrane transport
c65775_g1	GO:0016036	biological_process	cellular response to phosphate starvation
c65775_g1	GO:0035435	biological_process	phosphate ion transmembrane transport
c65775_g1	GO:0016036	biological_process	cellular response to phosphate starvation
c65775_g1	GO:0035435	biological_process	phosphate ion transmembrane transport
c65775_g1	GO:0016036	biological_process	cellular response to phosphate starvation
c65775_g1	GO:0035435	biological_process	phosphate ion transmembrane transport
c65775_g1	GO:0016036	biological_process	cellular response to phosphate starvation
c65775_g1	GO:0035435	biological_process	phosphate ion transmembrane transport
c65775_g1	GO:0016036	biological_process	cellular response to phosphate starvation
c65775_g1	GO:0035435	biological_process	phosphate ion transmembrane transport
c65775_g1	GO:0016036	biological_process	cellular response to phosphate starvation
c65775_g1	GO:0035435	biological_process	phosphate ion transmembrane transport
c65775_g1	GO:0016036	biological_process	cellular response to phosphate starvation
c65775_g1	GO:0035435	biological_process	phosphate ion transmembrane transport
c65775_g1	GO:0016036	biological_process	cellular response to phosphate starvation
c65775_g1	GO:0035435	biological_process	phosphate ion transmembrane transport
c65775_g1	GO:0016036	biological_process	cellular response to phosphate starvation
c65775_g1	GO:0035435	biological_process	phosphate ion transmembrane transport
c65775_g1	GO:0016036	biological_process	cellular response to phosphate starvation
c65775_g1	GO:0035435	biological_process	phosphate ion transmembrane transport
c65775_g1	GO:0016036	biological_process	cellular response to phosphate starvation
c65775_g1	GO:0035435	biological_process	phosphate ion transmembrane transport
c66207_g2	GO:0019253	biological_process	reductive pentose-phosphate cycle
c66207_g2	GO:0019253	biological_process	reductive pentose-phosphate cycle
c66207_g2	GO:0019253	biological_process	reductive pentose-phosphate cycle
c66207_g2	GO:0019253	biological_process	reductive pentose-phosphate cycle
c66207_g2	GO:0019253	biological_process	reductive pentose-phosphate cycle
c66229_g3	GO:0009738	biological_process	abscisic acid-activated signaling pathway
c66229_g3	GO:0006970	biological_process	response to osmotic stress
c66229_g3	GO:0009414	biological_process	response to water deprivation
c66229_g3	GO:0010431	biological_process	seed maturation
c66229_g3	GO:0010375	biological_process	stomatal complex patterning
c67801_g4	GO:0009567	biological_process	double fertilization forming a zygote and endosperm
c67801_g4	GO:0006355	biological_process	regulation of transcription, DNA-templated
c67801_g4	GO:0006351	biological_process	transcription, DNA-templated
c67892_g3	GO:1902603	biological_process	carnitine transmembrane transport
c67892_g3	GO:0010150	biological_process	leaf senescence
c67892_g3	GO:1902603	biological_process	carnitine transmembrane transport
c67892_g3	GO:0010150	biological_process	leaf senescence
c67892_g3	GO:1902603	biological_process	carnitine transmembrane transport
c67892_g3	GO:0010150	biological_process	leaf senescence
c67892_g3	GO:1902603	biological_process	carnitine transmembrane transport
c67892_g3	GO:0010150	biological_process	leaf senescence
c67892_g3	GO:1902603	biological_process	carnitine transmembrane transport
c67892_g3	GO:0010150	biological_process	leaf senescence
c68127_g2	GO:0006096	biological_process	glycolytic process
c68127_g2	GO:0006633	biological_process	fatty acid biosynthetic process
c68127_g2	GO:0006096	biological_process	glycolytic process
c68127_g2	GO:0006629	biological_process	lipid metabolic process
c68127_g2	GO:0046686	biological_process	response to cadmium ion
c68127_g2	GO:0048316	biological_process	seed development
c68127_g2	GO:0010431	biological_process	seed maturation
c68127_g2	GO:0006096	biological_process	glycolytic process
c68127_g2	GO:0006633	biological_process	fatty acid biosynthetic process
c68127_g2	GO:0006096	biological_process	glycolytic process
c68127_g2	GO:0006629	biological_process	lipid metabolic process
c68127_g2	GO:0046686	biological_process	response to cadmium ion
c68127_g2	GO:0048316	biological_process	seed development
c68127_g2	GO:0010431	biological_process	seed maturation
c68127_g2	GO:0006096	biological_process	glycolytic process
c68127_g2	GO:0006633	biological_process	fatty acid biosynthetic process
c68127_g2	GO:0006096	biological_process	glycolytic process
c68127_g2	GO:0006629	biological_process	lipid metabolic process
c68127_g2	GO:0046686	biological_process	response to cadmium ion
c68127_g2	GO:0048316	biological_process	seed development
c68127_g2	GO:0010431	biological_process	seed maturation
c68127_g2	GO:0006096	biological_process	glycolytic process
c68127_g2	GO:0006633	biological_process	fatty acid biosynthetic process
c68127_g2	GO:0006096	biological_process	glycolytic process
c68127_g2	GO:0006629	biological_process	lipid metabolic process
c68127_g2	GO:0046686	biological_process	response to cadmium ion
c68127_g2	GO:0048316	biological_process	seed development
c68127_g2	GO:0010431	biological_process	seed maturation
c68127_g2	GO:0006096	biological_process	glycolytic process
c68127_g2	GO:0006096	biological_process	glycolytic process
c68127_g2	GO:0006096	biological_process	glycolytic process
c68127_g2	GO:0006096	biological_process	glycolytic process
c68231_g1	GO:0007623	biological_process	circadian rhythm
c68231_g1	GO:0048574	biological_process	long-day photoperiodism, flowering
c68231_g1	GO:0042754	biological_process	negative regulation of circadian rhythm
c68231_g1	GO:0043433	biological_process	negative regulation of sequence-specific DNA binding transcription factor activity
c68231_g1	GO:0042752	biological_process	regulation of circadian rhythm
c68231_g1	GO:0006355	biological_process	regulation of transcription, DNA-templated
c68231_g1	GO:0009737	biological_process	response to abscisic acid
c68231_g1	GO:0009733	biological_process	response to auxin
c68231_g1	GO:0046686	biological_process	response to cadmium ion
c68231_g1	GO:0009409	biological_process	response to cold
c68231_g1	GO:0009723	biological_process	response to ethylene
c68231_g1	GO:0009739	biological_process	response to gibberellin
c68231_g1	GO:0009753	biological_process	response to jasmonic acid
c68231_g1	GO:0009751	biological_process	response to salicylic acid
c68231_g1	GO:0009651	biological_process	response to salt stress
c68231_g1	GO:0006351	biological_process	transcription, DNA-templated
c68231_g1	GO:0007623	biological_process	circadian rhythm
c68231_g1	GO:0048574	biological_process	long-day photoperiodism, flowering
c68231_g1	GO:0042754	biological_process	negative regulation of circadian rhythm
c68231_g1	GO:0043433	biological_process	negative regulation of sequence-specific DNA binding transcription factor activity
c68231_g1	GO:0042752	biological_process	regulation of circadian rhythm
c68231_g1	GO:0006355	biological_process	regulation of transcription, DNA-templated
c68231_g1	GO:0009737	biological_process	response to abscisic acid
c68231_g1	GO:0009733	biological_process	response to auxin
c68231_g1	GO:0046686	biological_process	response to cadmium ion
c68231_g1	GO:0009409	biological_process	response to cold
c68231_g1	GO:0009723	biological_process	response to ethylene
c68231_g1	GO:0009739	biological_process	response to gibberellin
c68231_g1	GO:0009753	biological_process	response to jasmonic acid
c68231_g1	GO:0009751	biological_process	response to salicylic acid
c68231_g1	GO:0009651	biological_process	response to salt stress
c68231_g1	GO:0006351	biological_process	transcription, DNA-templated
c68231_g1	GO:0007623	biological_process	circadian rhythm
c68231_g1	GO:0048574	biological_process	long-day photoperiodism, flowering
c68231_g1	GO:0042754	biological_process	negative regulation of circadian rhythm
c68231_g1	GO:0043433	biological_process	negative regulation of sequence-specific DNA binding transcription factor activity
c68231_g1	GO:0042752	biological_process	regulation of circadian rhythm
c68231_g1	GO:0006355	biological_process	regulation of transcription, DNA-templated
c68231_g1	GO:0009737	biological_process	response to abscisic acid
c68231_g1	GO:0009733	biological_process	response to auxin
c68231_g1	GO:0046686	biological_process	response to cadmium ion
c68231_g1	GO:0009409	biological_process	response to cold
c68231_g1	GO:0009723	biological_process	response to ethylene
c68231_g1	GO:0009739	biological_process	response to gibberellin
c68231_g1	GO:0009753	biological_process	response to jasmonic acid
c68231_g1	GO:0009751	biological_process	response to salicylic acid
c68231_g1	GO:0009651	biological_process	response to salt stress
c68231_g1	GO:0006351	biological_process	transcription, DNA-templated
c68231_g1	GO:0007623	biological_process	circadian rhythm
c68231_g1	GO:0048574	biological_process	long-day photoperiodism, flowering
c68231_g1	GO:0042754	biological_process	negative regulation of circadian rhythm
c68231_g1	GO:0043433	biological_process	negative regulation of sequence-specific DNA binding transcription factor activity
c68231_g1	GO:0042752	biological_process	regulation of circadian rhythm
c68231_g1	GO:0006355	biological_process	regulation of transcription, DNA-templated
c68231_g1	GO:0009737	biological_process	response to abscisic acid
c68231_g1	GO:0009733	biological_process	response to auxin
c68231_g1	GO:0046686	biological_process	response to cadmium ion
c68231_g1	GO:0009409	biological_process	response to cold
c68231_g1	GO:0009723	biological_process	response to ethylene
c68231_g1	GO:0009739	biological_process	response to gibberellin
c68231_g1	GO:0009753	biological_process	response to jasmonic acid
c68231_g1	GO:0009751	biological_process	response to salicylic acid
c68231_g1	GO:0009651	biological_process	response to salt stress
c68231_g1	GO:0006351	biological_process	transcription, DNA-templated
c68231_g1	GO:0007623	biological_process	circadian rhythm
c68231_g1	GO:0048574	biological_process	long-day photoperiodism, flowering
c68231_g1	GO:0042754	biological_process	negative regulation of circadian rhythm
c68231_g1	GO:0043433	biological_process	negative regulation of sequence-specific DNA binding transcription factor activity
c68231_g1	GO:0042752	biological_process	regulation of circadian rhythm
c68231_g1	GO:0006355	biological_process	regulation of transcription, DNA-templated
c68231_g1	GO:0009737	biological_process	response to abscisic acid
c68231_g1	GO:0009733	biological_process	response to auxin
c68231_g1	GO:0046686	biological_process	response to cadmium ion
c68231_g1	GO:0009409	biological_process	response to cold
c68231_g1	GO:0009723	biological_process	response to ethylene
c68231_g1	GO:0009739	biological_process	response to gibberellin
c68231_g1	GO:0009753	biological_process	response to jasmonic acid
c68231_g1	GO:0009751	biological_process	response to salicylic acid
c68231_g1	GO:0009651	biological_process	response to salt stress
c68231_g1	GO:0006351	biological_process	transcription, DNA-templated
c68920_g4	GO:0009638	biological_process	phototropism
c68920_g4	GO:0010017	biological_process	red or far-red light signaling pathway
c68920_g4	GO:0009585	biological_process	red, far-red light phototransduction
c69503_g2	GO:0009691	biological_process	cytokinin biosynthetic process
c69503_g2	GO:0008033	biological_process	tRNA processing
c69914_g2	GO:0033306	biological_process	phytol metabolic process
c69914_g2	GO:0019432	biological_process	triglyceride biosynthetic process
c69914_g2	GO:0033306	biological_process	phytol metabolic process
c69914_g2	GO:0019432	biological_process	triglyceride biosynthetic process
c69914_g2	GO:0033306	biological_process	phytol metabolic process
c69914_g2	GO:0019432	biological_process	triglyceride biosynthetic process
c69914_g2	GO:0033306	biological_process	phytol metabolic process
c69914_g2	GO:0019432	biological_process	triglyceride biosynthetic process
c69914_g2	GO:0033306	biological_process	phytol metabolic process
c69914_g2	GO:0019432	biological_process	triglyceride biosynthetic process
c70315_g1	GO:0009908	biological_process	flower development
c70315_g1	GO:0006355	biological_process	regulation of transcription, DNA-templated
c70315_g1	GO:0006351	biological_process	transcription, DNA-templated
c70315_g1	GO:0009908	biological_process	flower development
c70315_g1	GO:0006355	biological_process	regulation of transcription, DNA-templated
c70315_g1	GO:0006351	biological_process	transcription, DNA-templated
c70315_g1	GO:0009908	biological_process	flower development
c70315_g1	GO:0006355	biological_process	regulation of transcription, DNA-templated
c70315_g1	GO:0006351	biological_process	transcription, DNA-templated
c70315_g1	GO:0009908	biological_process	flower development
c70315_g1	GO:0006355	biological_process	regulation of transcription, DNA-templated
c70315_g1	GO:0006351	biological_process	transcription, DNA-templated
c70315_g1	GO:0009908	biological_process	flower development
c70315_g1	GO:0006355	biological_process	regulation of transcription, DNA-templated
c70315_g1	GO:0006351	biological_process	transcription, DNA-templated
c70315_g1	GO:0009908	biological_process	flower development
c70315_g1	GO:0006355	biological_process	regulation of transcription, DNA-templated
c70315_g1	GO:0006351	biological_process	transcription, DNA-templated
c70315_g1	GO:0009908	biological_process	flower development
c70315_g1	GO:0006355	biological_process	regulation of transcription, DNA-templated
c70315_g1	GO:0006351	biological_process	transcription, DNA-templated
c70315_g1	GO:0009908	biological_process	flower development
c70315_g1	GO:0006355	biological_process	regulation of transcription, DNA-templated
c70315_g1	GO:0006351	biological_process	transcription, DNA-templated
c70315_g1	GO:0009908	biological_process	flower development
c70315_g1	GO:0006355	biological_process	regulation of transcription, DNA-templated
c70315_g1	GO:0006351	biological_process	transcription, DNA-templated
c70406_g4	GO:0080001	biological_process	mucilage extrusion from seed coat
c70406_g4	GO:0048359	biological_process	mucilage metabolic process involved in seed coat development
c70406_g4	GO:0043086	biological_process	negative regulation of catalytic activity
c70406_g4	GO:0010214	biological_process	seed coat development
c2961_g1	GO:0016021	cellular_component	integral component of membrane
c4114_g1	GO:0005618	cellular_component	cell wall
c4114_g1	GO:0005576	cellular_component	extracellular region
c7945_g1	GO:0005576	cellular_component	extracellular region
c7945_g1	GO:0005576	cellular_component	extracellular region
c10986_g1	GO:0005737	cellular_component	cytoplasm
c10986_g1	GO:0005634	cellular_component	nucleus
c19374_g1	GO:0009570	cellular_component	chloroplast stroma
c19374_g1	GO:0005829	cellular_component	cytosol
c34641_g1	GO:0005789	cellular_component	endoplasmic reticulum membrane
c34641_g1	GO:0016021	cellular_component	integral component of membrane
c45235_g1	GO:0005634	cellular_component	nucleus
c48057_g1	GO:0005829	cellular_component	cytosol
c48057_g1	GO:0000151	cellular_component	ubiquitin ligase complex
c48109_g1	GO:0005615	cellular_component	extracellular space
c48236_g1	GO:0016021	cellular_component	integral component of membrane
c48236_g1	GO:0005774	cellular_component	vacuolar membrane
c48236_g1	GO:0016021	cellular_component	integral component of membrane
c48236_g1	GO:0005774	cellular_component	vacuolar membrane
c49858_g1	GO:0005887	cellular_component	integral component of plasma membrane
c49965_g1	GO:0005634	cellular_component	nucleus
c49965_g1	GO:0005634	cellular_component	nucleus
c50232_g1	GO:0005634	cellular_component	nucleus
c50341_g1	GO:0016021	cellular_component	integral component of membrane
c50341_g2	GO:0016021	cellular_component	integral component of membrane
c50341_g2	GO:0016021	cellular_component	integral component of membrane
c50648_g1	GO:0005789	cellular_component	endoplasmic reticulum membrane
c50648_g1	GO:0016021	cellular_component	integral component of membrane
c51538_g2	GO:0009507	cellular_component	chloroplast
c51538_g2	GO:0009507	cellular_component	chloroplast
c51538_g2	GO:0009507	cellular_component	chloroplast
c52065_g1	GO:0016021	cellular_component	integral component of membrane
c52065_g1	GO:0016020	cellular_component	membrane
c52065_g1	GO:0005634	cellular_component	nucleus
c52065_g1	GO:0005886	cellular_component	plasma membrane
c52230_g1	GO:0005634	cellular_component	nucleus
c52286_g2	GO:0048046	cellular_component	apoplast
c52286_g2	GO:0009505	cellular_component	plant-type cell wall
c52286_g2	GO:0009506	cellular_component	plasmodesma
c53738_g1	GO:0016021	cellular_component	integral component of membrane
c53972_g1	GO:0005576	cellular_component	extracellular region
c54083_g2	GO:0009535	cellular_component	chloroplast thylakoid membrane
c54083_g2	GO:0009654	cellular_component	photosystem II oxygen evolving complex
c54083_g2	GO:0009535	cellular_component	chloroplast thylakoid membrane
c54083_g2	GO:0009654	cellular_component	photosystem II oxygen evolving complex
c54083_g2	GO:0009535	cellular_component	chloroplast thylakoid membrane
c54083_g2	GO:0009654	cellular_component	photosystem II oxygen evolving complex
c54091_g1	GO:0005634	cellular_component	nucleus
c54091_g1	GO:0005634	cellular_component	nucleus
c54281_g2	GO:0016021	cellular_component	integral component of membrane
c54281_g2	GO:0016021	cellular_component	integral component of membrane
c54281_g2	GO:0016021	cellular_component	integral component of membrane
c54285_g1	GO:0009535	cellular_component	chloroplast thylakoid membrane
c54285_g1	GO:0016021	cellular_component	integral component of membrane
c54285_g1	GO:0009522	cellular_component	photosystem I
c54285_g1	GO:0009523	cellular_component	photosystem II
c54285_g1	GO:0009535	cellular_component	chloroplast thylakoid membrane
c54285_g1	GO:0016021	cellular_component	integral component of membrane
c54285_g1	GO:0009522	cellular_component	photosystem I
c54285_g1	GO:0009523	cellular_component	photosystem II
c54308_g1	GO:0048046	cellular_component	apoplast
c54308_g1	GO:0048046	cellular_component	apoplast
c54342_g2	GO:0005783	cellular_component	endoplasmic reticulum
c54342_g2	GO:0016021	cellular_component	integral component of membrane
c54342_g2	GO:0005783	cellular_component	endoplasmic reticulum
c54342_g2	GO:0016021	cellular_component	integral component of membrane
c54342_g2	GO:0005783	cellular_component	endoplasmic reticulum
c54342_g2	GO:0016021	cellular_component	integral component of membrane
c54947_g1	GO:0005634	cellular_component	nucleus
c54947_g1	GO:0005634	cellular_component	nucleus
c54947_g1	GO:0005634	cellular_component	nucleus
c55676_g1	GO:0031012	cellular_component	extracellular matrix
c55676_g1	GO:0031012	cellular_component	extracellular matrix
c55900_g1	GO:0016021	cellular_component	integral component of membrane
c55900_g1	GO:0016021	cellular_component	integral component of membrane
c55900_g1	GO:0016021	cellular_component	integral component of membrane
c55916_g1	GO:0000786	cellular_component	nucleosome
c55916_g1	GO:0005634	cellular_component	nucleus
c55916_g1	GO:0000786	cellular_component	nucleosome
c55916_g1	GO:0005634	cellular_component	nucleus
c55916_g1	GO:0000786	cellular_component	nucleosome
c55916_g1	GO:0005634	cellular_component	nucleus
c55916_g1	GO:0000786	cellular_component	nucleosome
c55916_g1	GO:0005634	cellular_component	nucleus
c56007_g3	GO:0048046	cellular_component	apoplast
c56229_g1	GO:0048046	cellular_component	apoplast
c56229_g1	GO:0009507	cellular_component	chloroplast
c56229_g1	GO:0009941	cellular_component	chloroplast envelope
c56229_g1	GO:0009570	cellular_component	chloroplast stroma
c56229_g1	GO:0009535	cellular_component	chloroplast thylakoid membrane
c56229_g1	GO:0016020	cellular_component	membrane
c56229_g1	GO:0010319	cellular_component	stromule
c56229_g1	GO:0009579	cellular_component	thylakoid
c56240_g2	GO:0031965	cellular_component	nuclear membrane
c56240_g2	GO:0005886	cellular_component	plasma membrane
c56240_g2	GO:0009506	cellular_component	plasmodesma
c56240_g2	GO:0031965	cellular_component	nuclear membrane
c56240_g2	GO:0005886	cellular_component	plasma membrane
c56240_g2	GO:0009506	cellular_component	plasmodesma
c56299_g1	GO:0005576	cellular_component	extracellular region
c56446_g1	GO:0005737	cellular_component	cytoplasm
c56493_g1	GO:0009535	cellular_component	chloroplast thylakoid membrane
c56493_g1	GO:0009570	cellular_component	chloroplast stroma
c56493_g1	GO:0009535	cellular_component	chloroplast thylakoid membrane
c56493_g1	GO:0031977	cellular_component	thylakoid lumen
c56531_g1	GO:0016021	cellular_component	integral component of membrane
c56531_g1	GO:0005886	cellular_component	plasma membrane
c56753_g1	GO:0009507	cellular_component	chloroplast
c56753_g1	GO:0009507	cellular_component	chloroplast
c56753_g1	GO:0009507	cellular_component	chloroplast
c56790_g1	GO:0016021	cellular_component	integral component of membrane
c56790_g1	GO:0005886	cellular_component	plasma membrane
c56790_g1	GO:0000324	cellular_component	fungal-type vacuole
c56790_g1	GO:0000329	cellular_component	fungal-type vacuole membrane
c56790_g1	GO:0016021	cellular_component	integral component of membrane
c56790_g1	GO:0016021	cellular_component	integral component of membrane
c56790_g1	GO:0005886	cellular_component	plasma membrane
c56790_g1	GO:0000324	cellular_component	fungal-type vacuole
c56790_g1	GO:0000329	cellular_component	fungal-type vacuole membrane
c56790_g1	GO:0016021	cellular_component	integral component of membrane
c56831_g1	GO:0005887	cellular_component	integral component of plasma membrane
c56831_g1	GO:0005887	cellular_component	integral component of plasma membrane
c56901_g7	GO:0005634	cellular_component	nucleus
c56901_g7	GO:0005634	cellular_component	nucleus
c57359_g1	GO:0048046	cellular_component	apoplast
c57359_g1	GO:0005618	cellular_component	cell wall
c57359_g1	GO:0005576	cellular_component	extracellular region
c57359_g1	GO:0009505	cellular_component	plant-type cell wall
c57359_g1	GO:0048046	cellular_component	apoplast
c57359_g1	GO:0005618	cellular_component	cell wall
c57359_g1	GO:0005576	cellular_component	extracellular region
c57359_g1	GO:0009505	cellular_component	plant-type cell wall
c57697_g1	GO:0005737	cellular_component	cytoplasm
c57697_g1	GO:0005737	cellular_component	cytoplasm
c57697_g1	GO:0005737	cellular_component	cytoplasm
c57779_g1	GO:0005737	cellular_component	cytoplasm
c57779_g1	GO:0005856	cellular_component	cytoskeleton
c57779_g1	GO:0005737	cellular_component	cytoplasm
c57779_g1	GO:0005856	cellular_component	cytoskeleton
c57779_g1	GO:0005737	cellular_component	cytoplasm
c57779_g1	GO:0005856	cellular_component	cytoskeleton
c57779_g1	GO:0005737	cellular_component	cytoplasm
c57779_g1	GO:0005856	cellular_component	cytoskeleton
c57779_g1	GO:0005737	cellular_component	cytoplasm
c57779_g1	GO:0005856	cellular_component	cytoskeleton
c57779_g1	GO:0005737	cellular_component	cytoplasm
c57779_g1	GO:0005856	cellular_component	cytoskeleton
c57779_g1	GO:0005737	cellular_component	cytoplasm
c57779_g1	GO:0005856	cellular_component	cytoskeleton
c57779_g1	GO:0005737	cellular_component	cytoplasm
c57779_g1	GO:0005856	cellular_component	cytoskeleton
c58031_g1	GO:0000151	cellular_component	ubiquitin ligase complex
c58031_g1	GO:0000151	cellular_component	ubiquitin ligase complex
c58313_g1	GO:0016021	cellular_component	integral component of membrane
c58313_g1	GO:0016021	cellular_component	integral component of membrane
c58339_g2	GO:0005634	cellular_component	nucleus
c58339_g2	GO:0005634	cellular_component	nucleus
c58414_g1	GO:0005634	cellular_component	nucleus
c58414_g1	GO:0005634	cellular_component	nucleus
c58953_g1	GO:0009507	cellular_component	chloroplast
c58953_g1	GO:0009570	cellular_component	chloroplast stroma
c58953_g1	GO:0009507	cellular_component	chloroplast
c58953_g1	GO:0009570	cellular_component	chloroplast stroma
c58953_g1	GO:0009507	cellular_component	chloroplast
c58953_g1	GO:0009570	cellular_component	chloroplast stroma
c58953_g1	GO:0009507	cellular_component	chloroplast
c58953_g1	GO:0009570	cellular_component	chloroplast stroma
c58954_g5	GO:0005737	cellular_component	cytoplasm
c58954_g5	GO:0005737	cellular_component	cytoplasm
c58967_g2	GO:0016363	cellular_component	nuclear matrix
c58967_g2	GO:0042025	cellular_component	host cell nucleus
c59291_g1	GO:0009279	cellular_component	cell outer membrane
c59291_g1	GO:0009535	cellular_component	chloroplast thylakoid membrane
c59291_g1	GO:0019898	cellular_component	extrinsic component of membrane
c59291_g1	GO:0016021	cellular_component	integral component of membrane
c59291_g1	GO:0009654	cellular_component	photosystem II oxygen evolving complex
c59291_g1	GO:0009279	cellular_component	cell outer membrane
c59291_g1	GO:0009535	cellular_component	chloroplast thylakoid membrane
c59291_g1	GO:0019898	cellular_component	extrinsic component of membrane
c59291_g1	GO:0016021	cellular_component	integral component of membrane
c59291_g1	GO:0009654	cellular_component	photosystem II oxygen evolving complex
c59291_g1	GO:0009279	cellular_component	cell outer membrane
c59291_g1	GO:0009535	cellular_component	chloroplast thylakoid membrane
c59291_g1	GO:0019898	cellular_component	extrinsic component of membrane
c59291_g1	GO:0016021	cellular_component	integral component of membrane
c59291_g1	GO:0009654	cellular_component	photosystem II oxygen evolving complex
c59291_g1	GO:0009279	cellular_component	cell outer membrane
c59291_g1	GO:0009535	cellular_component	chloroplast thylakoid membrane
c59291_g1	GO:0019898	cellular_component	extrinsic component of membrane
c59291_g1	GO:0016021	cellular_component	integral component of membrane
c59291_g1	GO:0009654	cellular_component	photosystem II oxygen evolving complex
c59291_g1	GO:0009279	cellular_component	cell outer membrane
c59291_g1	GO:0009535	cellular_component	chloroplast thylakoid membrane
c59291_g1	GO:0019898	cellular_component	extrinsic component of membrane
c59291_g1	GO:0016021	cellular_component	integral component of membrane
c59291_g1	GO:0009654	cellular_component	photosystem II oxygen evolving complex
c59306_g2	GO:0005634	cellular_component	nucleus
c59306_g2	GO:0005634	cellular_component	nucleus
c59650_g3	GO:0005634	cellular_component	nucleus
c59709_g1	GO:0005634	cellular_component	nucleus
c59890_g1	GO:0005737	cellular_component	cytoplasm
c59890_g1	GO:0016020	cellular_component	membrane
c59890_g1	GO:0005737	cellular_component	cytoplasm
c59890_g1	GO:0016020	cellular_component	membrane
c60188_g4	GO:0005634	cellular_component	nucleus
c60188_g4	GO:0005634	cellular_component	nucleus
c60273_g2	GO:0005576	cellular_component	extracellular region
c60273_g2	GO:0005829	cellular_component	cytosol
c60273_g2	GO:0005576	cellular_component	extracellular region
c60273_g2	GO:0005773	cellular_component	vacuole
c60273_g2	GO:0005576	cellular_component	extracellular region
c60328_g2	GO:0030430	cellular_component	host cell cytoplasm
c60328_g2	GO:0019028	cellular_component	viral capsid
c60370_g4	GO:0016021	cellular_component	integral component of membrane
c60370_g5	GO:0016021	cellular_component	integral component of membrane
c60370_g5	GO:0016021	cellular_component	integral component of membrane
c60370_g5	GO:0016021	cellular_component	integral component of membrane
c60370_g5	GO:0016021	cellular_component	integral component of membrane
c60370_g5	GO:0016021	cellular_component	integral component of membrane
c60499_g2	GO:0048046	cellular_component	apoplast
c60499_g2	GO:0048046	cellular_component	apoplast
c60499_g2	GO:0048046	cellular_component	apoplast
c60499_g2	GO:0048046	cellular_component	apoplast
c60499_g2	GO:0048046	cellular_component	apoplast
c60499_g2	GO:0048046	cellular_component	apoplast
c60499_g2	GO:0048046	cellular_component	apoplast
c60499_g2	GO:0048046	cellular_component	apoplast
c60867_g1	GO:0031225	cellular_component	anchored component of membrane
c60867_g1	GO:0046658	cellular_component	anchored component of plasma membrane
c60867_g1	GO:0005886	cellular_component	plasma membrane
c60867_g1	GO:0005773	cellular_component	vacuole
c60977_g1	GO:0009507	cellular_component	chloroplast
c60981_g3	GO:0009570	cellular_component	chloroplast stroma
c60981_g3	GO:0009570	cellular_component	chloroplast stroma
c60992_g1	GO:0005737	cellular_component	cytoplasm
c60992_g1	GO:0005829	cellular_component	cytosol
c60992_g1	GO:0005634	cellular_component	nucleus
c60992_g1	GO:0005737	cellular_component	cytoplasm
c60992_g1	GO:0005829	cellular_component	cytosol
c60992_g1	GO:0005634	cellular_component	nucleus
c61125_g1	GO:0016021	cellular_component	integral component of membrane
c61125_g1	GO:0016021	cellular_component	integral component of membrane
c61125_g1	GO:0016021	cellular_component	integral component of membrane
c61412_g4	GO:0005783	cellular_component	endoplasmic reticulum
c61412_g4	GO:0016021	cellular_component	integral component of membrane
c61437_g4	GO:0016021	cellular_component	integral component of membrane
c61437_g4	GO:0016021	cellular_component	integral component of membrane
c61437_g4	GO:0016021	cellular_component	integral component of membrane
c61437_g4	GO:0016021	cellular_component	integral component of membrane
c61437_g4	GO:0016021	cellular_component	integral component of membrane
c61437_g4	GO:0016021	cellular_component	integral component of membrane
c61490_g2	GO:0016021	cellular_component	integral component of membrane
c61490_g2	GO:0016020	cellular_component	membrane
c61490_g2	GO:0005886	cellular_component	plasma membrane
c61490_g2	GO:0016021	cellular_component	integral component of membrane
c61490_g2	GO:0016020	cellular_component	membrane
c61490_g2	GO:0005886	cellular_component	plasma membrane
c61490_g2	GO:0016021	cellular_component	integral component of membrane
c61490_g2	GO:0016020	cellular_component	membrane
c61490_g2	GO:0005886	cellular_component	plasma membrane
c61579_g3	GO:0009706	cellular_component	chloroplast inner membrane
c61641_g2	GO:0016021	cellular_component	integral component of membrane
c61762_g2	GO:0016021	cellular_component	integral component of membrane
c61762_g2	GO:0005886	cellular_component	plasma membrane
c61863_g2	GO:0005886	cellular_component	plasma membrane
c61863_g2	GO:0005886	cellular_component	plasma membrane
c61915_g2	GO:0005634	cellular_component	nucleus
c61915_g2	GO:0005634	cellular_component	nucleus
c61960_g1	GO:0016021	cellular_component	integral component of membrane
c61960_g1	GO:0005886	cellular_component	plasma membrane
c61960_g1	GO:0016021	cellular_component	integral component of membrane
c61960_g1	GO:0005886	cellular_component	plasma membrane
c61960_g1	GO:0016021	cellular_component	integral component of membrane
c61960_g1	GO:0005886	cellular_component	plasma membrane
c62001_g1	GO:0009507	cellular_component	chloroplast
c62001_g1	GO:0010287	cellular_component	plastoglobule
c62001_g1	GO:0009507	cellular_component	chloroplast
c62001_g1	GO:0010287	cellular_component	plastoglobule
c62001_g1	GO:0009507	cellular_component	chloroplast
c62001_g1	GO:0010287	cellular_component	plastoglobule
c62001_g1	GO:0009507	cellular_component	chloroplast
c62001_g1	GO:0010287	cellular_component	plastoglobule
c62002_g1	GO:0031225	cellular_component	anchored component of membrane
c62002_g1	GO:0046658	cellular_component	anchored component of plasma membrane
c62002_g1	GO:0005576	cellular_component	extracellular region
c62002_g1	GO:0009505	cellular_component	plant-type cell wall
c62002_g1	GO:0005886	cellular_component	plasma membrane
c62002_g1	GO:0031225	cellular_component	anchored component of membrane
c62002_g1	GO:0046658	cellular_component	anchored component of plasma membrane
c62002_g1	GO:0005886	cellular_component	plasma membrane
c62002_g1	GO:0031225	cellular_component	anchored component of membrane
c62002_g1	GO:0046658	cellular_component	anchored component of plasma membrane
c62002_g1	GO:0005886	cellular_component	plasma membrane
c62209_g3	GO:0048046	cellular_component	apoplast
c62209_g3	GO:0005618	cellular_component	cell wall
c62209_g3	GO:0005576	cellular_component	extracellular region
c62209_g3	GO:0009505	cellular_component	plant-type cell wall
c62209_g3	GO:0048046	cellular_component	apoplast
c62209_g3	GO:0005618	cellular_component	cell wall
c62209_g3	GO:0005576	cellular_component	extracellular region
c62209_g3	GO:0009505	cellular_component	plant-type cell wall
c62209_g3	GO:0048046	cellular_component	apoplast
c62209_g3	GO:0005618	cellular_component	cell wall
c62209_g3	GO:0005576	cellular_component	extracellular region
c62209_g3	GO:0009505	cellular_component	plant-type cell wall
c62347_g5	GO:0016021	cellular_component	integral component of membrane
c62347_g5	GO:0005886	cellular_component	plasma membrane
c62536_g2	GO:0009535	cellular_component	chloroplast thylakoid membrane
c63805_g3	GO:0009535	cellular_component	chloroplast thylakoid membrane
c63805_g3	GO:0019898	cellular_component	extrinsic component of membrane
c63805_g3	GO:0009654	cellular_component	photosystem II oxygen evolving complex
c63805_g3	GO:0048046	cellular_component	apoplast
c63805_g3	GO:0009507	cellular_component	chloroplast
c63805_g3	GO:0009941	cellular_component	chloroplast envelope
c63805_g3	GO:0009570	cellular_component	chloroplast stroma
c63805_g3	GO:0009534	cellular_component	chloroplast thylakoid
c63805_g3	GO:0009543	cellular_component	chloroplast thylakoid lumen
c63805_g3	GO:0009535	cellular_component	chloroplast thylakoid membrane
c63805_g3	GO:0019898	cellular_component	extrinsic component of membrane
c63805_g3	GO:0009654	cellular_component	photosystem II oxygen evolving complex
c63805_g3	GO:0009579	cellular_component	thylakoid
c63805_g3	GO:0031977	cellular_component	thylakoid lumen
c63805_g3	GO:0009535	cellular_component	chloroplast thylakoid membrane
c63805_g3	GO:0019898	cellular_component	extrinsic component of membrane
c63805_g3	GO:0009654	cellular_component	photosystem II oxygen evolving complex
c63805_g3	GO:0009535	cellular_component	chloroplast thylakoid membrane
c63805_g3	GO:0019898	cellular_component	extrinsic component of membrane
c63805_g3	GO:0009654	cellular_component	photosystem II oxygen evolving complex
c63805_g3	GO:0009535	cellular_component	chloroplast thylakoid membrane
c63805_g3	GO:0019898	cellular_component	extrinsic component of membrane
c63805_g3	GO:0009654	cellular_component	photosystem II oxygen evolving complex
c63805_g3	GO:0048046	cellular_component	apoplast
c63805_g3	GO:0009941	cellular_component	chloroplast envelope
c63805_g3	GO:0009570	cellular_component	chloroplast stroma
c63805_g3	GO:0009535	cellular_component	chloroplast thylakoid membrane
c63805_g3	GO:0019898	cellular_component	extrinsic component of membrane
c63805_g3	GO:0009654	cellular_component	photosystem II oxygen evolving complex
c63805_g3	GO:0031977	cellular_component	thylakoid lumen
c63805_g3	GO:0009535	cellular_component	chloroplast thylakoid membrane
c63805_g3	GO:0019898	cellular_component	extrinsic component of membrane
c63805_g3	GO:0009654	cellular_component	photosystem II oxygen evolving complex
c63805_g3	GO:0009535	cellular_component	chloroplast thylakoid membrane
c63805_g3	GO:0019898	cellular_component	extrinsic component of membrane
c63805_g3	GO:0009654	cellular_component	photosystem II oxygen evolving complex
c63805_g3	GO:0048046	cellular_component	apoplast
c63805_g3	GO:0009507	cellular_component	chloroplast
c63805_g3	GO:0009941	cellular_component	chloroplast envelope
c63805_g3	GO:0009570	cellular_component	chloroplast stroma
c63805_g3	GO:0009534	cellular_component	chloroplast thylakoid
c63805_g3	GO:0009543	cellular_component	chloroplast thylakoid lumen
c63805_g3	GO:0009535	cellular_component	chloroplast thylakoid membrane
c63805_g3	GO:0019898	cellular_component	extrinsic component of membrane
c63805_g3	GO:0009654	cellular_component	photosystem II oxygen evolving complex
c63805_g3	GO:0009579	cellular_component	thylakoid
c63805_g3	GO:0031977	cellular_component	thylakoid lumen
c63805_g3	GO:0009535	cellular_component	chloroplast thylakoid membrane
c63805_g3	GO:0019898	cellular_component	extrinsic component of membrane
c63805_g3	GO:0009654	cellular_component	photosystem II oxygen evolving complex
c63853_g1	GO:0005634	cellular_component	nucleus
c63853_g1	GO:0005634	cellular_component	nucleus
c63853_g1	GO:0005634	cellular_component	nucleus
c63853_g1	GO:0005634	cellular_component	nucleus
c64158_g1	GO:0016021	cellular_component	integral component of membrane
c64158_g1	GO:0016021	cellular_component	integral component of membrane
c64158_g1	GO:0016021	cellular_component	integral component of membrane
c64158_g1	GO:0016021	cellular_component	integral component of membrane
c64158_g1	GO:0016021	cellular_component	integral component of membrane
c64158_g1	GO:0016021	cellular_component	integral component of membrane
c64378_g2	GO:0005634	cellular_component	nucleus
c64378_g2	GO:0005634	cellular_component	nucleus
c64378_g2	GO:0005634	cellular_component	nucleus
c64378_g2	GO:0005634	cellular_component	nucleus
c64461_g5	GO:0005634	cellular_component	nucleus
c64461_g5	GO:0005634	cellular_component	nucleus
c64461_g5	GO:0005737	cellular_component	cytoplasm
c64461_g5	GO:0005634	cellular_component	nucleus
c64461_g5	GO:0005737	cellular_component	cytoplasm
c64461_g5	GO:0005634	cellular_component	nucleus
c64652_g4	GO:0005576	cellular_component	extracellular region
c64780_g2	GO:0005576	cellular_component	extracellular region
c64780_g2	GO:0005576	cellular_component	extracellular region
c64780_g2	GO:0005576	cellular_component	extracellular region
c64780_g2	GO:0005576	cellular_component	extracellular region
c64780_g2	GO:0005576	cellular_component	extracellular region
c64780_g2	GO:0005576	cellular_component	extracellular region
c64780_g2	GO:0005576	cellular_component	extracellular region
c64780_g2	GO:0005576	cellular_component	extracellular region
c64780_g2	GO:0005576	cellular_component	extracellular region
c64780_g2	GO:0005576	cellular_component	extracellular region
c64780_g2	GO:0005576	cellular_component	extracellular region
c64780_g2	GO:0005576	cellular_component	extracellular region
c64861_g1	GO:0048046	cellular_component	apoplast
c64861_g1	GO:0009941	cellular_component	chloroplast envelope
c64861_g1	GO:0009570	cellular_component	chloroplast stroma
c64861_g1	GO:0009534	cellular_component	chloroplast thylakoid
c64861_g1	GO:0005737	cellular_component	cytoplasm
c64861_g1	GO:0022626	cellular_component	cytosolic ribosome
c64861_g1	GO:0031977	cellular_component	thylakoid lumen
c65060_g1	GO:0009507	cellular_component	chloroplast
c65060_g1	GO:0009706	cellular_component	chloroplast inner membrane
c65060_g1	GO:0009570	cellular_component	chloroplast stroma
c65060_g1	GO:0010007	cellular_component	magnesium chelatase complex
c65060_g1	GO:0005739	cellular_component	mitochondrion
c65219_g3	GO:0009507	cellular_component	chloroplast
c65219_g3	GO:0009507	cellular_component	chloroplast
c65219_g3	GO:0009507	cellular_component	chloroplast
c65219_g3	GO:0009507	cellular_component	chloroplast
c65519_g2	GO:0005618	cellular_component	cell wall
c65519_g2	GO:0005576	cellular_component	extracellular region
c65775_g1	GO:0005794	cellular_component	Golgi apparatus
c65775_g1	GO:0016021	cellular_component	integral component of membrane
c65775_g1	GO:0005886	cellular_component	plasma membrane
c65775_g1	GO:0005802	cellular_component	trans-Golgi network
c65775_g1	GO:0005794	cellular_component	Golgi apparatus
c65775_g1	GO:0016021	cellular_component	integral component of membrane
c65775_g1	GO:0005886	cellular_component	plasma membrane
c65775_g1	GO:0005802	cellular_component	trans-Golgi network
c65775_g1	GO:0005794	cellular_component	Golgi apparatus
c65775_g1	GO:0016021	cellular_component	integral component of membrane
c65775_g1	GO:0005886	cellular_component	plasma membrane
c65775_g1	GO:0005802	cellular_component	trans-Golgi network
c65775_g1	GO:0005794	cellular_component	Golgi apparatus
c65775_g1	GO:0016021	cellular_component	integral component of membrane
c65775_g1	GO:0005886	cellular_component	plasma membrane
c65775_g1	GO:0005802	cellular_component	trans-Golgi network
c65775_g1	GO:0005794	cellular_component	Golgi apparatus
c65775_g1	GO:0016021	cellular_component	integral component of membrane
c65775_g1	GO:0005886	cellular_component	plasma membrane
c65775_g1	GO:0005802	cellular_component	trans-Golgi network
c65775_g1	GO:0005794	cellular_component	Golgi apparatus
c65775_g1	GO:0016021	cellular_component	integral component of membrane
c65775_g1	GO:0005886	cellular_component	plasma membrane
c65775_g1	GO:0005802	cellular_component	trans-Golgi network
c65775_g1	GO:0005794	cellular_component	Golgi apparatus
c65775_g1	GO:0016021	cellular_component	integral component of membrane
c65775_g1	GO:0005886	cellular_component	plasma membrane
c65775_g1	GO:0005802	cellular_component	trans-Golgi network
c65775_g1	GO:0005794	cellular_component	Golgi apparatus
c65775_g1	GO:0016021	cellular_component	integral component of membrane
c65775_g1	GO:0005886	cellular_component	plasma membrane
c65775_g1	GO:0005802	cellular_component	trans-Golgi network
c65775_g1	GO:0005794	cellular_component	Golgi apparatus
c65775_g1	GO:0016021	cellular_component	integral component of membrane
c65775_g1	GO:0005886	cellular_component	plasma membrane
c65775_g1	GO:0005802	cellular_component	trans-Golgi network
c65775_g1	GO:0005794	cellular_component	Golgi apparatus
c65775_g1	GO:0016021	cellular_component	integral component of membrane
c65775_g1	GO:0005886	cellular_component	plasma membrane
c65775_g1	GO:0005802	cellular_component	trans-Golgi network
c65775_g1	GO:0005794	cellular_component	Golgi apparatus
c65775_g1	GO:0016021	cellular_component	integral component of membrane
c65775_g1	GO:0005886	cellular_component	plasma membrane
c65775_g1	GO:0005802	cellular_component	trans-Golgi network
c65775_g1	GO:0005794	cellular_component	Golgi apparatus
c65775_g1	GO:0016021	cellular_component	integral component of membrane
c65775_g1	GO:0005886	cellular_component	plasma membrane
c65775_g1	GO:0005802	cellular_component	trans-Golgi network
c65775_g1	GO:0005794	cellular_component	Golgi apparatus
c65775_g1	GO:0016021	cellular_component	integral component of membrane
c65775_g1	GO:0005886	cellular_component	plasma membrane
c65775_g1	GO:0005802	cellular_component	trans-Golgi network
c66207_g2	GO:0005773	cellular_component	vacuole
c66207_g2	GO:0009507	cellular_component	chloroplast
c66207_g2	GO:0005773	cellular_component	vacuole
c66207_g2	GO:0009507	cellular_component	chloroplast
c66207_g2	GO:0005773	cellular_component	vacuole
c66207_g2	GO:0009507	cellular_component	chloroplast
c66207_g2	GO:0009507	cellular_component	chloroplast
c66207_g2	GO:0009507	cellular_component	chloroplast
c66207_g2	GO:0005773	cellular_component	vacuole
c66229_g3	GO:0016021	cellular_component	integral component of membrane
c66229_g3	GO:0005886	cellular_component	plasma membrane
c66260_g3	GO:0016021	cellular_component	integral component of membrane
c66260_g3	GO:0005886	cellular_component	plasma membrane
c66260_g3	GO:0016021	cellular_component	integral component of membrane
c66260_g3	GO:0005886	cellular_component	plasma membrane
c66260_g3	GO:0016021	cellular_component	integral component of membrane
c66260_g3	GO:0005886	cellular_component	plasma membrane
c66260_g3	GO:0016021	cellular_component	integral component of membrane
c66260_g3	GO:0005886	cellular_component	plasma membrane
c66260_g3	GO:0016021	cellular_component	integral component of membrane
c66260_g3	GO:0016021	cellular_component	integral component of membrane
c66260_g3	GO:0005886	cellular_component	plasma membrane
c66279_g4	GO:0005737	cellular_component	cytoplasm
c66318_g3	GO:0016021	cellular_component	integral component of membrane
c66318_g3	GO:0016020	cellular_component	membrane
c66318_g3	GO:0005886	cellular_component	plasma membrane
c66318_g3	GO:0009506	cellular_component	plasmodesma
c67351_g4	GO:0016021	cellular_component	integral component of membrane
c67351_g4	GO:0016021	cellular_component	integral component of membrane
c67801_g4	GO:0005634	cellular_component	nucleus
c67801_g4	GO:0009506	cellular_component	plasmodesma
c67890_g4	GO:0016021	cellular_component	integral component of membrane
c67890_g4	GO:0016021	cellular_component	integral component of membrane
c67890_g4	GO:0016021	cellular_component	integral component of membrane
c67890_g4	GO:0016021	cellular_component	integral component of membrane
c67890_g4	GO:0016021	cellular_component	integral component of membrane
c67890_g4	GO:0016021	cellular_component	integral component of membrane
c67890_g4	GO:0016021	cellular_component	integral component of membrane
c67890_g4	GO:0016021	cellular_component	integral component of membrane
c67890_g4	GO:0016021	cellular_component	integral component of membrane
c67892_g3	GO:0016021	cellular_component	integral component of membrane
c67892_g3	GO:0005886	cellular_component	plasma membrane
c67892_g3	GO:0016021	cellular_component	integral component of membrane
c67892_g3	GO:0005886	cellular_component	plasma membrane
c67892_g3	GO:0016021	cellular_component	integral component of membrane
c67892_g3	GO:0005886	cellular_component	plasma membrane
c67892_g3	GO:0016021	cellular_component	integral component of membrane
c67892_g3	GO:0005886	cellular_component	plasma membrane
c67892_g3	GO:0016021	cellular_component	integral component of membrane
c67892_g3	GO:0005886	cellular_component	plasma membrane
c68046_g2	GO:0016021	cellular_component	integral component of membrane
c68046_g2	GO:0005774	cellular_component	vacuolar membrane
c68046_g2	GO:0016021	cellular_component	integral component of membrane
c68046_g2	GO:0005774	cellular_component	vacuolar membrane
c68046_g2	GO:0016021	cellular_component	integral component of membrane
c68046_g2	GO:0005774	cellular_component	vacuolar membrane
c68046_g2	GO:0016021	cellular_component	integral component of membrane
c68046_g2	GO:0005774	cellular_component	vacuolar membrane
c68046_g2	GO:0016021	cellular_component	integral component of membrane
c68046_g2	GO:0005774	cellular_component	vacuolar membrane
c68127_g2	GO:0009507	cellular_component	chloroplast
c68127_g2	GO:0009507	cellular_component	chloroplast
c68127_g2	GO:0009570	cellular_component	chloroplast stroma
c68127_g2	GO:0005739	cellular_component	mitochondrion
c68127_g2	GO:0009507	cellular_component	chloroplast
c68127_g2	GO:0009507	cellular_component	chloroplast
c68127_g2	GO:0009570	cellular_component	chloroplast stroma
c68127_g2	GO:0005739	cellular_component	mitochondrion
c68127_g2	GO:0009507	cellular_component	chloroplast
c68127_g2	GO:0009507	cellular_component	chloroplast
c68127_g2	GO:0009570	cellular_component	chloroplast stroma
c68127_g2	GO:0005739	cellular_component	mitochondrion
c68127_g2	GO:0009507	cellular_component	chloroplast
c68127_g2	GO:0009507	cellular_component	chloroplast
c68127_g2	GO:0009570	cellular_component	chloroplast stroma
c68127_g2	GO:0005739	cellular_component	mitochondrion
c68127_g2	GO:0009507	cellular_component	chloroplast
c68127_g2	GO:0009507	cellular_component	chloroplast
c68127_g2	GO:0009507	cellular_component	chloroplast
c68127_g2	GO:0009507	cellular_component	chloroplast
c68231_g1	GO:0005634	cellular_component	nucleus
c68231_g1	GO:0005634	cellular_component	nucleus
c68231_g1	GO:0005634	cellular_component	nucleus
c68231_g1	GO:0005634	cellular_component	nucleus
c68231_g1	GO:0005634	cellular_component	nucleus
c68942_g3	GO:0016021	cellular_component	integral component of membrane
c69437_g4	GO:0016021	cellular_component	integral component of membrane
c69437_g4	GO:0005886	cellular_component	plasma membrane
c69503_g2	GO:0009507	cellular_component	chloroplast
c69503_g2	GO:0009536	cellular_component	plastid
c69914_g2	GO:0009507	cellular_component	chloroplast
c69914_g2	GO:0010287	cellular_component	plastoglobule
c69914_g2	GO:0009507	cellular_component	chloroplast
c69914_g2	GO:0010287	cellular_component	plastoglobule
c69914_g2	GO:0009507	cellular_component	chloroplast
c69914_g2	GO:0010287	cellular_component	plastoglobule
c69914_g2	GO:0009507	cellular_component	chloroplast
c69914_g2	GO:0010287	cellular_component	plastoglobule
c69914_g2	GO:0009507	cellular_component	chloroplast
c69914_g2	GO:0010287	cellular_component	plastoglobule
c70299_g3	GO:0016021	cellular_component	integral component of membrane
c70299_g3	GO:0005886	cellular_component	plasma membrane
c70315_g1	GO:0005634	cellular_component	nucleus
c70315_g1	GO:0005634	cellular_component	nucleus
c70315_g1	GO:0005634	cellular_component	nucleus
c70315_g1	GO:0005634	cellular_component	nucleus
c70315_g1	GO:0005634	cellular_component	nucleus
c70315_g1	GO:0005634	cellular_component	nucleus
c70315_g1	GO:0005634	cellular_component	nucleus
c70315_g1	GO:0005634	cellular_component	nucleus
c70315_g1	GO:0005634	cellular_component	nucleus
c70406_g4	GO:0048046	cellular_component	apoplast
c70406_g4	GO:0005618	cellular_component	cell wall
c70406_g4	GO:0005576	cellular_component	extracellular region
c70406_g4	GO:0009505	cellular_component	plant-type cell wall
c4114_g1	GO:0045330	molecular_function	aspartyl esterase activity
c4114_g1	GO:0004857	molecular_function	enzyme inhibitor activity
c4114_g1	GO:0030599	molecular_function	pectinesterase activity
c5849_g1	GO:0000166	molecular_function	nucleotide binding
c5849_g1	GO:0003723	molecular_function	RNA binding
c5849_g1	GO:0003968	molecular_function	RNA-directed RNA polymerase activity
c7945_g1	GO:0020037	molecular_function	heme binding
c7945_g1	GO:0046872	molecular_function	metal ion binding
c7945_g1	GO:0004601	molecular_function	peroxidase activity
c7945_g1	GO:0020037	molecular_function	heme binding
c7945_g1	GO:0046872	molecular_function	metal ion binding
c7945_g1	GO:0004601	molecular_function	peroxidase activity
c10986_g1	GO:0010427	molecular_function	abscisic acid binding
c10986_g1	GO:0005515	molecular_function	protein binding
c10986_g1	GO:0042803	molecular_function	protein homodimerization activity
c10986_g1	GO:0004872	molecular_function	receptor activity
c19374_g1	GO:0046872	molecular_function	metal ion binding
c26578_g1	GO:0004805	molecular_function	trehalose-phosphatase activity
c26578_g1	GO:0004805	molecular_function	trehalose-phosphatase activity
c26578_g1	GO:0004805	molecular_function	trehalose-phosphatase activity
c34641_g1	GO:0020037	molecular_function	heme binding
c34641_g1	GO:0046872	molecular_function	metal ion binding
c45095_g1	GO:0046872	molecular_function	metal ion binding
c45095_g1	GO:0016706	molecular_function	oxidoreductase activity, acting on paired donors, with incorporation or reduction of molecular oxygen, 2-oxoglutarate as one donor, and incorporation of one atom each of oxygen into both donors
c45095_g1	GO:0046872	molecular_function	metal ion binding
c45095_g1	GO:0016706	molecular_function	oxidoreductase activity, acting on paired donors, with incorporation or reduction of molecular oxygen, 2-oxoglutarate as one donor, and incorporation of one atom each of oxygen into both donors
c45095_g1	GO:0046872	molecular_function	metal ion binding
c45095_g1	GO:0016706	molecular_function	oxidoreductase activity, acting on paired donors, with incorporation or reduction of molecular oxygen, 2-oxoglutarate as one donor, and incorporation of one atom each of oxygen into both donors
c45235_g1	GO:0005515	molecular_function	protein binding
c47855_g1	GO:0047213	molecular_function	anthocyanidin 3-O-glucosyltransferase activity
c48057_g1	GO:0004842	molecular_function	ubiquitin-protein transferase activity
c48109_g1	GO:0004568	molecular_function	chitinase activity
c49858_g1	GO:0051119	molecular_function	sugar transmembrane transporter activity
c49965_g1	GO:0003677	molecular_function	DNA binding
c49965_g1	GO:0003700	molecular_function	sequence-specific DNA binding transcription factor activity
c49965_g1	GO:0003677	molecular_function	DNA binding
c49965_g1	GO:0003700	molecular_function	sequence-specific DNA binding transcription factor activity
c50232_g1	GO:0005515	molecular_function	protein binding
c50232_g1	GO:0043565	molecular_function	sequence-specific DNA binding
c50232_g1	GO:0003700	molecular_function	sequence-specific DNA binding transcription factor activity
c50341_g1	GO:0008199	molecular_function	ferric iron binding
c50341_g1	GO:0020037	molecular_function	heme binding
c50341_g1	GO:0004497	molecular_function	monooxygenase activity
c50341_g1	GO:0016705	molecular_function	oxidoreductase activity, acting on paired donors, with incorporation or reduction of molecular oxygen
c50341_g1	GO:0010012	molecular_function	steroid 22-alpha hydroxylase activity
c50341_g2	GO:0008199	molecular_function	ferric iron binding
c50341_g2	GO:0020037	molecular_function	heme binding
c50341_g2	GO:0004497	molecular_function	monooxygenase activity
c50341_g2	GO:0016705	molecular_function	oxidoreductase activity, acting on paired donors, with incorporation or reduction of molecular oxygen
c50341_g2	GO:0010012	molecular_function	steroid 22-alpha hydroxylase activity
c50341_g2	GO:0008199	molecular_function	ferric iron binding
c50341_g2	GO:0020037	molecular_function	heme binding
c50341_g2	GO:0004497	molecular_function	monooxygenase activity
c50341_g2	GO:0016705	molecular_function	oxidoreductase activity, acting on paired donors, with incorporation or reduction of molecular oxygen
c50341_g2	GO:0010012	molecular_function	steroid 22-alpha hydroxylase activity
c50648_g1	GO:0020037	molecular_function	heme binding
c50648_g1	GO:0005506	molecular_function	iron ion binding
c50648_g1	GO:0004497	molecular_function	monooxygenase activity
c50648_g1	GO:0016705	molecular_function	oxidoreductase activity, acting on paired donors, with incorporation or reduction of molecular oxygen
c51239_g1	GO:0005524	molecular_function	ATP binding
c51239_g1	GO:0004674	molecular_function	protein serine/threonine kinase activity
c51239_g1	GO:0005524	molecular_function	ATP binding
c51239_g1	GO:0004674	molecular_function	protein serine/threonine kinase activity
c52065_g1	GO:0005515	molecular_function	protein binding
c52230_g1	GO:0003700	molecular_function	sequence-specific DNA binding transcription factor activity
c52286_g2	GO:0005179	molecular_function	hormone activity
c52286_g2	GO:0004871	molecular_function	signal transducer activity
c52949_g1	GO:0009815	molecular_function	1-aminocyclopropane-1-carboxylate oxidase activity
c52949_g1	GO:0031418	molecular_function	L-ascorbic acid binding
c52949_g1	GO:0046872	molecular_function	metal ion binding
c52949_g1	GO:0016706	molecular_function	oxidoreductase activity, acting on paired donors, with incorporation or reduction of molecular oxygen, 2-oxoglutarate as one donor, and incorporation of one atom each of oxygen into both donors
c52949_g1	GO:0009815	molecular_function	1-aminocyclopropane-1-carboxylate oxidase activity
c52949_g1	GO:0031418	molecular_function	L-ascorbic acid binding
c52949_g1	GO:0046872	molecular_function	metal ion binding
c52949_g1	GO:0016706	molecular_function	oxidoreductase activity, acting on paired donors, with incorporation or reduction of molecular oxygen, 2-oxoglutarate as one donor, and incorporation of one atom each of oxygen into both donors
c53709_g1	GO:0046872	molecular_function	metal ion binding
c53709_g1	GO:0016706	molecular_function	oxidoreductase activity, acting on paired donors, with incorporation or reduction of molecular oxygen, 2-oxoglutarate as one donor, and incorporation of one atom each of oxygen into both donors
c53709_g1	GO:0046872	molecular_function	metal ion binding
c53709_g1	GO:0016706	molecular_function	oxidoreductase activity, acting on paired donors, with incorporation or reduction of molecular oxygen, 2-oxoglutarate as one donor, and incorporation of one atom each of oxygen into both donors
c53709_g1	GO:0046872	molecular_function	metal ion binding
c53709_g1	GO:0016706	molecular_function	oxidoreductase activity, acting on paired donors, with incorporation or reduction of molecular oxygen, 2-oxoglutarate as one donor, and incorporation of one atom each of oxygen into both donors
c53738_g1	GO:0004650	molecular_function	polygalacturonase activity
c53972_g1	GO:0016298	molecular_function	lipase activity
c54091_g1	GO:0046872	molecular_function	metal ion binding
c54091_g1	GO:0043565	molecular_function	sequence-specific DNA binding
c54091_g1	GO:0003700	molecular_function	sequence-specific DNA binding transcription factor activity
c54091_g1	GO:0046872	molecular_function	metal ion binding
c54091_g1	GO:0043565	molecular_function	sequence-specific DNA binding
c54091_g1	GO:0003700	molecular_function	sequence-specific DNA binding transcription factor activity
c54165_g1	GO:0080019	molecular_function	fatty-acyl-CoA reductase (alcohol-forming) activity
c54165_g1	GO:0080019	molecular_function	fatty-acyl-CoA reductase (alcohol-forming) activity
c54165_g1	GO:0080019	molecular_function	fatty-acyl-CoA reductase (alcohol-forming) activity
c54165_g1	GO:0080019	molecular_function	fatty-acyl-CoA reductase (alcohol-forming) activity
c54165_g1	GO:0080019	molecular_function	fatty-acyl-CoA reductase (alcohol-forming) activity
c54281_g2	GO:0008810	molecular_function	cellulase activity
c54281_g2	GO:0008810	molecular_function	cellulase activity
c54281_g2	GO:0008810	molecular_function	cellulase activity
c54342_g2	GO:0080161	molecular_function	auxin transmembrane transporter activity
c54342_g2	GO:0080161	molecular_function	auxin transmembrane transporter activity
c54342_g2	GO:0080161	molecular_function	auxin transmembrane transporter activity
c54941_g1	GO:0033897	molecular_function	ribonuclease T2 activity
c54941_g1	GO:0003723	molecular_function	RNA binding
c54947_g1	GO:0003677	molecular_function	DNA binding
c54947_g1	GO:0003700	molecular_function	sequence-specific DNA binding transcription factor activity
c54947_g1	GO:0003677	molecular_function	DNA binding
c54947_g1	GO:0003700	molecular_function	sequence-specific DNA binding transcription factor activity
c54947_g1	GO:0003677	molecular_function	DNA binding
c54947_g1	GO:0003700	molecular_function	sequence-specific DNA binding transcription factor activity
c55676_g1	GO:0004222	molecular_function	metalloendopeptidase activity
c55676_g1	GO:0008270	molecular_function	zinc ion binding
c55676_g1	GO:0004222	molecular_function	metalloendopeptidase activity
c55676_g1	GO:0008270	molecular_function	zinc ion binding
c55723_g1	GO:0050734	molecular_function	hydroxycinnamoyltransferase activity
c55723_g1	GO:0050734	molecular_function	hydroxycinnamoyltransferase activity
c55916_g1	GO:0003677	molecular_function	DNA binding
c55916_g1	GO:0003677	molecular_function	DNA binding
c55916_g1	GO:0005515	molecular_function	protein binding
c55916_g1	GO:0003677	molecular_function	DNA binding
c55916_g1	GO:0003677	molecular_function	DNA binding
c55916_g1	GO:0005515	molecular_function	protein binding
c56007_g3	GO:0005507	molecular_function	copper ion binding
c56007_g3	GO:0052716	molecular_function	hydroquinone:oxygen oxidoreductase activity
c56229_g1	GO:0005524	molecular_function	ATP binding
c56229_g1	GO:0008974	molecular_function	phosphoribulokinase activity
c56229_g1	GO:0005515	molecular_function	protein binding
c56240_g2	GO:0046872	molecular_function	metal ion binding
c56240_g2	GO:0005515	molecular_function	protein binding
c56240_g2	GO:0046872	molecular_function	metal ion binding
c56240_g2	GO:0005515	molecular_function	protein binding
c56299_g1	GO:0004190	molecular_function	aspartic-type endopeptidase activity
c56446_g1	GO:0047216	molecular_function	inositol 3-alpha-galactosyltransferase activity
c56446_g1	GO:0046872	molecular_function	metal ion binding
c56493_g1	GO:0005507	molecular_function	copper ion binding
c56493_g1	GO:0009055	molecular_function	electron carrier activity
c56493_g1	GO:0005507	molecular_function	copper ion binding
c56493_g1	GO:0009055	molecular_function	electron carrier activity
c56531_g1	GO:0005515	molecular_function	protein binding
c56531_g1	GO:0015250	molecular_function	water channel activity
c56742_g1	GO:0005506	molecular_function	iron ion binding
c56742_g1	GO:0016706	molecular_function	oxidoreductase activity, acting on paired donors, with incorporation or reduction of molecular oxygen, 2-oxoglutarate as one donor, and incorporation of one atom each of oxygen into both donors
c56742_g1	GO:0016740	molecular_function	transferase activity
c56742_g1	GO:0005506	molecular_function	iron ion binding
c56742_g1	GO:0016706	molecular_function	oxidoreductase activity, acting on paired donors, with incorporation or reduction of molecular oxygen, 2-oxoglutarate as one donor, and incorporation of one atom each of oxygen into both donors
c56742_g1	GO:0016740	molecular_function	transferase activity
c56742_g1	GO:0005506	molecular_function	iron ion binding
c56742_g1	GO:0016706	molecular_function	oxidoreductase activity, acting on paired donors, with incorporation or reduction of molecular oxygen, 2-oxoglutarate as one donor, and incorporation of one atom each of oxygen into both donors
c56742_g1	GO:0016740	molecular_function	transferase activity
c56753_g1	GO:0009905	molecular_function	ent-copalyl diphosphate synthase activity
c56753_g1	GO:0000287	molecular_function	magnesium ion binding
c56753_g1	GO:0010333	molecular_function	terpene synthase activity
c56753_g1	GO:0009905	molecular_function	ent-copalyl diphosphate synthase activity
c56753_g1	GO:0000287	molecular_function	magnesium ion binding
c56753_g1	GO:0010333	molecular_function	terpene synthase activity
c56753_g1	GO:0009905	molecular_function	ent-copalyl diphosphate synthase activity
c56753_g1	GO:0000287	molecular_function	magnesium ion binding
c56753_g1	GO:0010333	molecular_function	terpene synthase activity
c56790_g1	GO:0015186	molecular_function	L-glutamine transmembrane transporter activity
c56790_g1	GO:0015188	molecular_function	L-isoleucine transmembrane transporter activity
c56790_g1	GO:0005302	molecular_function	L-tyrosine transmembrane transporter activity
c56790_g1	GO:0005215	molecular_function	transporter activity
c56790_g1	GO:0015186	molecular_function	L-glutamine transmembrane transporter activity
c56790_g1	GO:0015188	molecular_function	L-isoleucine transmembrane transporter activity
c56790_g1	GO:0005302	molecular_function	L-tyrosine transmembrane transporter activity
c56790_g1	GO:0005215	molecular_function	transporter activity
c56831_g1	GO:0051119	molecular_function	sugar transmembrane transporter activity
c56831_g1	GO:0051119	molecular_function	sugar transmembrane transporter activity
c57132_g1	GO:0036361	molecular_function	racemase activity, acting on amino acids and derivatives
c57132_g1	GO:0036361	molecular_function	racemase activity, acting on amino acids and derivatives
c57359_g1	GO:0004252	molecular_function	serine-type endopeptidase activity
c57359_g1	GO:0004252	molecular_function	serine-type endopeptidase activity
c57662_g2	GO:0046872	molecular_function	metal ion binding
c57662_g2	GO:0008168	molecular_function	methyltransferase activity
c57697_g1	GO:0045544	molecular_function	gibberellin 20-oxidase activity
c57697_g1	GO:0005506	molecular_function	iron ion binding
c57697_g1	GO:0046872	molecular_function	metal ion binding
c57697_g1	GO:0016706	molecular_function	oxidoreductase activity, acting on paired donors, with incorporation or reduction of molecular oxygen, 2-oxoglutarate as one donor, and incorporation of one atom each of oxygen into both donors
c57697_g1	GO:0045544	molecular_function	gibberellin 20-oxidase activity
c57697_g1	GO:0005506	molecular_function	iron ion binding
c57697_g1	GO:0046872	molecular_function	metal ion binding
c57697_g1	GO:0016706	molecular_function	oxidoreductase activity, acting on paired donors, with incorporation or reduction of molecular oxygen, 2-oxoglutarate as one donor, and incorporation of one atom each of oxygen into both donors
c57697_g1	GO:0045544	molecular_function	gibberellin 20-oxidase activity
c57697_g1	GO:0005506	molecular_function	iron ion binding
c58000_g1	GO:0008168	molecular_function	methyltransferase activity
c58000_g1	GO:0008168	molecular_function	methyltransferase activity
c58000_g1	GO:0008168	molecular_function	methyltransferase activity
c58000_g1	GO:0008168	molecular_function	methyltransferase activity
c58000_g1	GO:0008168	molecular_function	methyltransferase activity
c58000_g1	GO:0008168	molecular_function	methyltransferase activity
c58000_g1	GO:0008168	molecular_function	methyltransferase activity
c58000_g1	GO:0052624	molecular_function	2-phytyl-1,4-naphthoquinone methyltransferase activity
c58000_g1	GO:0046872	molecular_function	metal ion binding
c58000_g1	GO:0080150	molecular_function	S-adenosyl-L-methionine:benzoic acid carboxyl methyl transferase activity
c58000_g1	GO:0008757	molecular_function	S-adenosylmethionine-dependent methyltransferase activity
c58019_g1	GO:0009055	molecular_function	electron carrier activity
c58019_g1	GO:0050660	molecular_function	flavin adenine dinucleotide binding
c58019_g1	GO:0020037	molecular_function	heme binding
c58019_g1	GO:0005506	molecular_function	iron ion binding
c58019_g1	GO:0030151	molecular_function	molybdenum ion binding
c58019_g1	GO:0043546	molecular_function	molybdopterin cofactor binding
c58019_g1	GO:0009703	molecular_function	nitrate reductase (NADH) activity
c58019_g2	GO:0009055	molecular_function	electron carrier activity
c58019_g2	GO:0050660	molecular_function	flavin adenine dinucleotide binding
c58019_g2	GO:0020037	molecular_function	heme binding
c58019_g2	GO:0005506	molecular_function	iron ion binding
c58019_g2	GO:0030151	molecular_function	molybdenum ion binding
c58019_g2	GO:0043546	molecular_function	molybdopterin cofactor binding
c58019_g2	GO:0009703	molecular_function	nitrate reductase (NADH) activity
c58019_g2	GO:0009055	molecular_function	electron carrier activity
c58019_g2	GO:0050660	molecular_function	flavin adenine dinucleotide binding
c58019_g2	GO:0020037	molecular_function	heme binding
c58019_g2	GO:0005506	molecular_function	iron ion binding
c58019_g2	GO:0030151	molecular_function	molybdenum ion binding
c58019_g2	GO:0043546	molecular_function	molybdopterin cofactor binding
c58019_g2	GO:0009703	molecular_function	nitrate reductase (NADH) activity
c58031_g1	GO:0004842	molecular_function	ubiquitin-protein transferase activity
c58031_g1	GO:0008270	molecular_function	zinc ion binding
c58031_g1	GO:0004842	molecular_function	ubiquitin-protein transferase activity
c58031_g1	GO:0008270	molecular_function	zinc ion binding
c58313_g1	GO:0020037	molecular_function	heme binding
c58313_g1	GO:0005506	molecular_function	iron ion binding
c58313_g1	GO:0004497	molecular_function	monooxygenase activity
c58313_g1	GO:0016705	molecular_function	oxidoreductase activity, acting on paired donors, with incorporation or reduction of molecular oxygen
c58313_g1	GO:0020037	molecular_function	heme binding
c58313_g1	GO:0005506	molecular_function	iron ion binding
c58313_g1	GO:0004497	molecular_function	monooxygenase activity
c58313_g1	GO:0016705	molecular_function	oxidoreductase activity, acting on paired donors, with incorporation or reduction of molecular oxygen
c58339_g2	GO:0005515	molecular_function	protein binding
c58339_g2	GO:0005515	molecular_function	protein binding
c58414_g1	GO:0003677	molecular_function	DNA binding
c58414_g1	GO:0004842	molecular_function	ubiquitin-protein transferase activity
c58414_g1	GO:0008270	molecular_function	zinc ion binding
c58414_g1	GO:0003677	molecular_function	DNA binding
c58414_g1	GO:0004842	molecular_function	ubiquitin-protein transferase activity
c58414_g1	GO:0008270	molecular_function	zinc ion binding
c58659_g1	GO:0050638	molecular_function	taxadien-5-alpha-ol O-acetyltransferase activity
c58870_g1	GO:0008422	molecular_function	beta-glucosidase activity
c58870_g1	GO:0008422	molecular_function	beta-glucosidase activity
c58870_g1	GO:0008422	molecular_function	beta-glucosidase activity
c58870_g1	GO:0047782	molecular_function	coniferin beta-glucosidase activity
c58953_g1	GO:0046872	molecular_function	metal ion binding
c58953_g1	GO:0016702	molecular_function	oxidoreductase activity, acting on single donors with incorporation of molecular oxygen, incorporation of two atoms of oxygen
c58953_g1	GO:0046872	molecular_function	metal ion binding
c58953_g1	GO:0016702	molecular_function	oxidoreductase activity, acting on single donors with incorporation of molecular oxygen, incorporation of two atoms of oxygen
c58953_g1	GO:0046872	molecular_function	metal ion binding
c58953_g1	GO:0016702	molecular_function	oxidoreductase activity, acting on single donors with incorporation of molecular oxygen, incorporation of two atoms of oxygen
c58953_g1	GO:0046872	molecular_function	metal ion binding
c58953_g1	GO:0016702	molecular_function	oxidoreductase activity, acting on single donors with incorporation of molecular oxygen, incorporation of two atoms of oxygen
c58954_g5	GO:0005524	molecular_function	ATP binding
c58954_g5	GO:0004612	molecular_function	phosphoenolpyruvate carboxykinase (ATP) activity
c58954_g5	GO:0005524	molecular_function	ATP binding
c58954_g5	GO:0004612	molecular_function	phosphoenolpyruvate carboxykinase (ATP) activity
c58967_g2	GO:0003682	molecular_function	chromatin binding
c58967_g2	GO:0003677	molecular_function	DNA binding
c58967_g2	GO:0005515	molecular_function	protein binding
c58967_g2	GO:0003700	molecular_function	sequence-specific DNA binding transcription factor activity
c58967_g2	GO:0003682	molecular_function	chromatin binding
c58967_g2	GO:0003677	molecular_function	DNA binding
c59291_g1	GO:0005509	molecular_function	calcium ion binding
c59291_g1	GO:0005509	molecular_function	calcium ion binding
c59291_g1	GO:0005509	molecular_function	calcium ion binding
c59291_g1	GO:0005509	molecular_function	calcium ion binding
c59291_g1	GO:0005509	molecular_function	calcium ion binding
c59306_g2	GO:0003682	molecular_function	chromatin binding
c59306_g2	GO:0003677	molecular_function	DNA binding
c59306_g2	GO:0003682	molecular_function	chromatin binding
c59306_g2	GO:0003677	molecular_function	DNA binding
c59650_g3	GO:0046872	molecular_function	metal ion binding
c59650_g3	GO:0043565	molecular_function	sequence-specific DNA binding
c59650_g3	GO:0003700	molecular_function	sequence-specific DNA binding transcription factor activity
c59706_g2	GO:0016161	molecular_function	beta-amylase activity
c59709_g1	GO:0003677	molecular_function	DNA binding
c59709_g1	GO:0005515	molecular_function	protein binding
c59709_g1	GO:0003700	molecular_function	sequence-specific DNA binding transcription factor activity
c59801_g1	GO:0020037	molecular_function	heme binding
c59801_g1	GO:0005506	molecular_function	iron ion binding
c59801_g1	GO:0004497	molecular_function	monooxygenase activity
c59801_g1	GO:0016705	molecular_function	oxidoreductase activity, acting on paired donors, with incorporation or reduction of molecular oxygen
c59801_g1	GO:0020037	molecular_function	heme binding
c59801_g1	GO:0005506	molecular_function	iron ion binding
c59801_g1	GO:0004497	molecular_function	monooxygenase activity
c59801_g1	GO:0016705	molecular_function	oxidoreductase activity, acting on paired donors, with incorporation or reduction of molecular oxygen
c59801_g1	GO:0020037	molecular_function	heme binding
c59801_g1	GO:0005506	molecular_function	iron ion binding
c59801_g1	GO:0004497	molecular_function	monooxygenase activity
c59801_g1	GO:0016705	molecular_function	oxidoreductase activity, acting on paired donors, with incorporation or reduction of molecular oxygen
c59890_g1	GO:0043531	molecular_function	ADP binding
c59890_g1	GO:0005524	molecular_function	ATP binding
c59890_g1	GO:0043531	molecular_function	ADP binding
c59890_g1	GO:0005524	molecular_function	ATP binding
c60188_g4	GO:0003677	molecular_function	DNA binding
c60188_g4	GO:0003700	molecular_function	sequence-specific DNA binding transcription factor activity
c60188_g4	GO:0003677	molecular_function	DNA binding
c60188_g4	GO:0003700	molecular_function	sequence-specific DNA binding transcription factor activity
c60273_g2	GO:0004185	molecular_function	serine-type carboxypeptidase activity
c60273_g2	GO:0004185	molecular_function	serine-type carboxypeptidase activity
c60273_g2	GO:0004185	molecular_function	serine-type carboxypeptidase activity
c60273_g2	GO:0004185	molecular_function	serine-type carboxypeptidase activity
c60328_g2	GO:0005198	molecular_function	structural molecule activity
c60495_g1	GO:0016788	molecular_function	hydrolase activity, acting on ester bonds
c60495_g1	GO:0019863	molecular_function	IgE binding
c60495_g1	GO:0016788	molecular_function	hydrolase activity, acting on ester bonds
c60495_g1	GO:0019863	molecular_function	IgE binding
c60495_g1	GO:0016788	molecular_function	hydrolase activity, acting on ester bonds
c60495_g1	GO:0019863	molecular_function	IgE binding
c60495_g1	GO:0016788	molecular_function	hydrolase activity, acting on ester bonds
c60495_g1	GO:0019863	molecular_function	IgE binding
c60499_g2	GO:0004565	molecular_function	beta-galactosidase activity
c60499_g2	GO:0030246	molecular_function	carbohydrate binding
c60499_g2	GO:0004565	molecular_function	beta-galactosidase activity
c60499_g2	GO:0004565	molecular_function	beta-galactosidase activity
c60499_g2	GO:0004565	molecular_function	beta-galactosidase activity
c60499_g2	GO:0004565	molecular_function	beta-galactosidase activity
c60499_g2	GO:0004565	molecular_function	beta-galactosidase activity
c60499_g2	GO:0004565	molecular_function	beta-galactosidase activity
c60499_g2	GO:0004565	molecular_function	beta-galactosidase activity
c60867_g1	GO:0005507	molecular_function	copper ion binding
c60867_g1	GO:0009055	molecular_function	electron carrier activity
c60867_g1	GO:0005507	molecular_function	copper ion binding
c60867_g1	GO:0009055	molecular_function	electron carrier activity
c60867_g1	GO:0005507	molecular_function	copper ion binding
c60867_g1	GO:0009055	molecular_function	electron carrier activity
c60867_g1	GO:0005507	molecular_function	copper ion binding
c60867_g1	GO:0009055	molecular_function	electron carrier activity
c60977_g1	GO:0047100	molecular_function	glyceraldehyde-3-phosphate dehydrogenase (NADP+) (phosphorylating) activity
c60977_g1	GO:0051287	molecular_function	NAD binding
c60977_g1	GO:0050661	molecular_function	NADP binding
c60981_g3	GO:0005524	molecular_function	ATP binding
c60981_g3	GO:0005524	molecular_function	ATP binding
c60988_g1	GO:0020037	molecular_function	heme binding
c60988_g1	GO:0005506	molecular_function	iron ion binding
c60988_g1	GO:0004497	molecular_function	monooxygenase activity
c60988_g1	GO:0016705	molecular_function	oxidoreductase activity, acting on paired donors, with incorporation or reduction of molecular oxygen
c60992_g1	GO:0008252	molecular_function	nucleotidase activity
c60992_g1	GO:0047405	molecular_function	pyrimidine-5'-nucleotide nucleosidase activity
c60992_g1	GO:0008252	molecular_function	nucleotidase activity
c60992_g1	GO:0047405	molecular_function	pyrimidine-5'-nucleotide nucleosidase activity
c61125_g1	GO:0020037	molecular_function	heme binding
c61125_g1	GO:0005506	molecular_function	iron ion binding
c61125_g1	GO:0004497	molecular_function	monooxygenase activity
c61125_g1	GO:0016705	molecular_function	oxidoreductase activity, acting on paired donors, with incorporation or reduction of molecular oxygen
c61125_g1	GO:0020037	molecular_function	heme binding
c61125_g1	GO:0005506	molecular_function	iron ion binding
c61125_g1	GO:0004497	molecular_function	monooxygenase activity
c61125_g1	GO:0016705	molecular_function	oxidoreductase activity, acting on paired donors, with incorporation or reduction of molecular oxygen
c61125_g1	GO:0020037	molecular_function	heme binding
c61125_g1	GO:0005506	molecular_function	iron ion binding
c61125_g1	GO:0004497	molecular_function	monooxygenase activity
c61125_g1	GO:0016705	molecular_function	oxidoreductase activity, acting on paired donors, with incorporation or reduction of molecular oxygen
c61412_g4	GO:0020037	molecular_function	heme binding
c61412_g4	GO:0005506	molecular_function	iron ion binding
c61412_g4	GO:0016705	molecular_function	oxidoreductase activity, acting on paired donors, with incorporation or reduction of molecular oxygen
c61412_g4	GO:0010012	molecular_function	steroid 22-alpha hydroxylase activity
c61437_g4	GO:0005524	molecular_function	ATP binding
c61437_g4	GO:0019829	molecular_function	cation-transporting ATPase activity
c61437_g4	GO:0000287	molecular_function	magnesium ion binding
c61437_g4	GO:0004012	molecular_function	phospholipid-translocating ATPase activity
c61437_g4	GO:0005524	molecular_function	ATP binding
c61437_g4	GO:0019829	molecular_function	cation-transporting ATPase activity
c61437_g4	GO:0000287	molecular_function	magnesium ion binding
c61437_g4	GO:0004012	molecular_function	phospholipid-translocating ATPase activity
c61490_g2	GO:0005524	molecular_function	ATP binding
c61490_g2	GO:0005515	molecular_function	protein binding
c61490_g2	GO:0004674	molecular_function	protein serine/threonine kinase activity
c61490_g2	GO:0019199	molecular_function	transmembrane receptor protein kinase activity
c61490_g2	GO:0005524	molecular_function	ATP binding
c61490_g2	GO:0005515	molecular_function	protein binding
c61490_g2	GO:0004674	molecular_function	protein serine/threonine kinase activity
c61490_g2	GO:0019199	molecular_function	transmembrane receptor protein kinase activity
c61490_g2	GO:0005524	molecular_function	ATP binding
c61490_g2	GO:0005515	molecular_function	protein binding
c61490_g2	GO:0004674	molecular_function	protein serine/threonine kinase activity
c61490_g2	GO:0019199	molecular_function	transmembrane receptor protein kinase activity
c61579_g3	GO:0016491	molecular_function	oxidoreductase activity
c61762_g2	GO:0080054	molecular_function	low affinity nitrate transmembrane transporter activity
c61762_g2	GO:0015293	molecular_function	symporter activity
c61772_g2	GO:0050474	molecular_function	(S)-norcoclaurine synthase activity
c61772_g2	GO:0046872	molecular_function	metal ion binding
c61772_g2	GO:0016706	molecular_function	oxidoreductase activity, acting on paired donors, with incorporation or reduction of molecular oxygen, 2-oxoglutarate as one donor, and incorporation of one atom each of oxygen into both donors
c61863_g2	GO:0016705	molecular_function	oxidoreductase activity, acting on paired donors, with incorporation or reduction of molecular oxygen
c61863_g2	GO:0016705	molecular_function	oxidoreductase activity, acting on paired donors, with incorporation or reduction of molecular oxygen
c61915_g2	GO:0005515	molecular_function	protein binding
c61915_g2	GO:0003700	molecular_function	sequence-specific DNA binding transcription factor activity
c61915_g2	GO:0008270	molecular_function	zinc ion binding
c61915_g2	GO:0005515	molecular_function	protein binding
c61915_g2	GO:0003700	molecular_function	sequence-specific DNA binding transcription factor activity
c61915_g2	GO:0008270	molecular_function	zinc ion binding
c61960_g1	GO:0004252	molecular_function	serine-type endopeptidase activity
c61960_g1	GO:0004252	molecular_function	serine-type endopeptidase activity
c61960_g1	GO:0004252	molecular_function	serine-type endopeptidase activity
c62001_g1	GO:0051213	molecular_function	dioxygenase activity
c62001_g1	GO:0046872	molecular_function	metal ion binding
c62001_g1	GO:0005515	molecular_function	protein binding
c62001_g1	GO:0051213	molecular_function	dioxygenase activity
c62001_g1	GO:0046872	molecular_function	metal ion binding
c62001_g1	GO:0005515	molecular_function	protein binding
c62001_g1	GO:0051213	molecular_function	dioxygenase activity
c62001_g1	GO:0046872	molecular_function	metal ion binding
c62001_g1	GO:0005515	molecular_function	protein binding
c62001_g1	GO:0051213	molecular_function	dioxygenase activity
c62001_g1	GO:0046872	molecular_function	metal ion binding
c62001_g1	GO:0005515	molecular_function	protein binding
c62002_g1	GO:0042973	molecular_function	glucan endo-1,3-beta-D-glucosidase activity
c62002_g1	GO:0042973	molecular_function	glucan endo-1,3-beta-D-glucosidase activity
c62002_g1	GO:0042973	molecular_function	glucan endo-1,3-beta-D-glucosidase activity
c62209_g3	GO:0004252	molecular_function	serine-type endopeptidase activity
c62209_g3	GO:0004252	molecular_function	serine-type endopeptidase activity
c62209_g3	GO:0004252	molecular_function	serine-type endopeptidase activity
c62353_g2	GO:0008171	molecular_function	O-methyltransferase activity
c62392_g1	GO:0046872	molecular_function	metal ion binding
c62392_g1	GO:0004721	molecular_function	phosphoprotein phosphatase activity
c62392_g1	GO:0046872	molecular_function	metal ion binding
c62392_g1	GO:0004721	molecular_function	phosphoprotein phosphatase activity
c62392_g1	GO:0046872	molecular_function	metal ion binding
c62392_g1	GO:0004721	molecular_function	phosphoprotein phosphatase activity
c62392_g1	GO:0046872	molecular_function	metal ion binding
c62392_g1	GO:0004721	molecular_function	phosphoprotein phosphatase activity
c62536_g2	GO:0045549	molecular_function	9-cis-epoxycarotenoid dioxygenase activity
c62536_g2	GO:0046872	molecular_function	metal ion binding
c63805_g3	GO:0005509	molecular_function	calcium ion binding
c63805_g3	GO:0005509	molecular_function	calcium ion binding
c63805_g3	GO:0008266	molecular_function	poly(U) RNA binding
c63805_g3	GO:0005509	molecular_function	calcium ion binding
c63805_g3	GO:0005509	molecular_function	calcium ion binding
c63805_g3	GO:0005509	molecular_function	calcium ion binding
c63805_g3	GO:0005509	molecular_function	calcium ion binding
c63805_g3	GO:0008266	molecular_function	poly(U) RNA binding
c63805_g3	GO:0005509	molecular_function	calcium ion binding
c63805_g3	GO:0005509	molecular_function	calcium ion binding
c63805_g3	GO:0005509	molecular_function	calcium ion binding
c63805_g3	GO:0008266	molecular_function	poly(U) RNA binding
c63805_g3	GO:0005509	molecular_function	calcium ion binding
c63853_g1	GO:0003677	molecular_function	DNA binding
c63853_g1	GO:0003700	molecular_function	sequence-specific DNA binding transcription factor activity
c63853_g1	GO:0008270	molecular_function	zinc ion binding
c63853_g1	GO:0003677	molecular_function	DNA binding
c63853_g1	GO:0003700	molecular_function	sequence-specific DNA binding transcription factor activity
c63853_g1	GO:0008270	molecular_function	zinc ion binding
c63853_g1	GO:0003677	molecular_function	DNA binding
c63853_g1	GO:0003700	molecular_function	sequence-specific DNA binding transcription factor activity
c63853_g1	GO:0008270	molecular_function	zinc ion binding
c63853_g1	GO:0003677	molecular_function	DNA binding
c63853_g1	GO:0003700	molecular_function	sequence-specific DNA binding transcription factor activity
c63853_g1	GO:0008270	molecular_function	zinc ion binding
c64378_g2	GO:0003700	molecular_function	sequence-specific DNA binding transcription factor activity
c64378_g2	GO:0000976	molecular_function	transcription regulatory region sequence-specific DNA binding
c64378_g2	GO:0003700	molecular_function	sequence-specific DNA binding transcription factor activity
c64378_g2	GO:0000976	molecular_function	transcription regulatory region sequence-specific DNA binding
c64378_g2	GO:0003700	molecular_function	sequence-specific DNA binding transcription factor activity
c64378_g2	GO:0000976	molecular_function	transcription regulatory region sequence-specific DNA binding
c64378_g2	GO:0003700	molecular_function	sequence-specific DNA binding transcription factor activity
c64378_g2	GO:0000976	molecular_function	transcription regulatory region sequence-specific DNA binding
c64461_g5	GO:0003677	molecular_function	DNA binding
c64461_g5	GO:0003700	molecular_function	sequence-specific DNA binding transcription factor activity
c64461_g5	GO:0003677	molecular_function	DNA binding
c64461_g5	GO:0003700	molecular_function	sequence-specific DNA binding transcription factor activity
c64461_g5	GO:0003677	molecular_function	DNA binding
c64461_g5	GO:0005515	molecular_function	protein binding
c64461_g5	GO:0003700	molecular_function	sequence-specific DNA binding transcription factor activity
c64461_g5	GO:0008134	molecular_function	transcription factor binding
c64461_g5	GO:0003677	molecular_function	DNA binding
c64461_g5	GO:0005515	molecular_function	protein binding
c64461_g5	GO:0003700	molecular_function	sequence-specific DNA binding transcription factor activity
c64461_g5	GO:0008134	molecular_function	transcription factor binding
c64652_g4	GO:0050660	molecular_function	flavin adenine dinucleotide binding
c64652_g4	GO:0008762	molecular_function	UDP-N-acetylmuramate dehydrogenase activity
c64780_g2	GO:0020037	molecular_function	heme binding
c64780_g2	GO:0046872	molecular_function	metal ion binding
c64780_g2	GO:0004601	molecular_function	peroxidase activity
c64780_g2	GO:0020037	molecular_function	heme binding
c64780_g2	GO:0046872	molecular_function	metal ion binding
c64780_g2	GO:0004601	molecular_function	peroxidase activity
c64780_g2	GO:0020037	molecular_function	heme binding
c64780_g2	GO:0046872	molecular_function	metal ion binding
c64780_g2	GO:0004601	molecular_function	peroxidase activity
c64780_g2	GO:0020037	molecular_function	heme binding
c64780_g2	GO:0046872	molecular_function	metal ion binding
c64780_g2	GO:0004601	molecular_function	peroxidase activity
c64780_g2	GO:0020037	molecular_function	heme binding
c64780_g2	GO:0046872	molecular_function	metal ion binding
c64780_g2	GO:0004601	molecular_function	peroxidase activity
c64780_g2	GO:0020037	molecular_function	heme binding
c64780_g2	GO:0046872	molecular_function	metal ion binding
c64780_g2	GO:0004601	molecular_function	peroxidase activity
c64780_g2	GO:0020037	molecular_function	heme binding
c64780_g2	GO:0046872	molecular_function	metal ion binding
c64780_g2	GO:0004601	molecular_function	peroxidase activity
c64780_g2	GO:0020037	molecular_function	heme binding
c64780_g2	GO:0046872	molecular_function	metal ion binding
c64780_g2	GO:0004601	molecular_function	peroxidase activity
c64780_g2	GO:0020037	molecular_function	heme binding
c64780_g2	GO:0046872	molecular_function	metal ion binding
c64780_g2	GO:0004601	molecular_function	peroxidase activity
c64780_g2	GO:0020037	molecular_function	heme binding
c64780_g2	GO:0046872	molecular_function	metal ion binding
c64780_g2	GO:0004601	molecular_function	peroxidase activity
c64780_g2	GO:0020037	molecular_function	heme binding
c64780_g2	GO:0046872	molecular_function	metal ion binding
c64780_g2	GO:0004601	molecular_function	peroxidase activity
c64780_g2	GO:0020037	molecular_function	heme binding
c64780_g2	GO:0046872	molecular_function	metal ion binding
c64780_g2	GO:0004601	molecular_function	peroxidase activity
c64861_g1	GO:0004332	molecular_function	fructose-bisphosphate aldolase activity
c65060_g1	GO:0005524	molecular_function	ATP binding
c65060_g1	GO:0016851	molecular_function	magnesium chelatase activity
c65219_g3	GO:0016767	molecular_function	geranylgeranyl-diphosphate geranylgeranyltransferase activity
c65219_g3	GO:0016767	molecular_function	geranylgeranyl-diphosphate geranylgeranyltransferase activity
c65219_g3	GO:0016767	molecular_function	geranylgeranyl-diphosphate geranylgeranyltransferase activity
c65219_g3	GO:0016767	molecular_function	geranylgeranyl-diphosphate geranylgeranyltransferase activity
c65519_g2	GO:0005199	molecular_function	structural constituent of cell wall
c65775_g1	GO:0015114	molecular_function	phosphate ion transmembrane transporter activity
c65775_g1	GO:0015114	molecular_function	phosphate ion transmembrane transporter activity
c65775_g1	GO:0015114	molecular_function	phosphate ion transmembrane transporter activity
c65775_g1	GO:0015114	molecular_function	phosphate ion transmembrane transporter activity
c65775_g1	GO:0015114	molecular_function	phosphate ion transmembrane transporter activity
c65775_g1	GO:0015114	molecular_function	phosphate ion transmembrane transporter activity
c65775_g1	GO:0015114	molecular_function	phosphate ion transmembrane transporter activity
c65775_g1	GO:0015114	molecular_function	phosphate ion transmembrane transporter activity
c65775_g1	GO:0015114	molecular_function	phosphate ion transmembrane transporter activity
c65775_g1	GO:0015114	molecular_function	phosphate ion transmembrane transporter activity
c65775_g1	GO:0015114	molecular_function	phosphate ion transmembrane transporter activity
c65775_g1	GO:0015114	molecular_function	phosphate ion transmembrane transporter activity
c65775_g1	GO:0015114	molecular_function	phosphate ion transmembrane transporter activity
c66207_g2	GO:0042132	molecular_function	fructose 1,6-bisphosphate 1-phosphatase activity
c66207_g2	GO:0046872	molecular_function	metal ion binding
c66207_g2	GO:0050278	molecular_function	sedoheptulose-bisphosphatase activity
c66207_g2	GO:0042132	molecular_function	fructose 1,6-bisphosphate 1-phosphatase activity
c66207_g2	GO:0046872	molecular_function	metal ion binding
c66207_g2	GO:0050278	molecular_function	sedoheptulose-bisphosphatase activity
c66207_g2	GO:0042132	molecular_function	fructose 1,6-bisphosphate 1-phosphatase activity
c66207_g2	GO:0046872	molecular_function	metal ion binding
c66207_g2	GO:0050278	molecular_function	sedoheptulose-bisphosphatase activity
c66207_g2	GO:0042132	molecular_function	fructose 1,6-bisphosphate 1-phosphatase activity
c66207_g2	GO:0046872	molecular_function	metal ion binding
c66207_g2	GO:0050278	molecular_function	sedoheptulose-bisphosphatase activity
c66207_g2	GO:0042132	molecular_function	fructose 1,6-bisphosphate 1-phosphatase activity
c66207_g2	GO:0046872	molecular_function	metal ion binding
c66207_g2	GO:0050278	molecular_function	sedoheptulose-bisphosphatase activity
c66229_g3	GO:0005524	molecular_function	ATP binding
c66229_g3	GO:0009927	molecular_function	histidine phosphotransfer kinase activity
c66229_g3	GO:0005034	molecular_function	osmosensor activity
c66229_g3	GO:0000156	molecular_function	phosphorelay response regulator activity
c66229_g3	GO:0000155	molecular_function	phosphorelay sensor kinase activity
c66229_g3	GO:0005515	molecular_function	protein binding
c66260_g3	GO:0015079	molecular_function	potassium ion transmembrane transporter activity
c66260_g3	GO:0009674	molecular_function	potassium:sodium symporter activity
c66260_g3	GO:0015079	molecular_function	potassium ion transmembrane transporter activity
c66260_g3	GO:0009674	molecular_function	potassium:sodium symporter activity
c66260_g3	GO:0015079	molecular_function	potassium ion transmembrane transporter activity
c66260_g3	GO:0009674	molecular_function	potassium:sodium symporter activity
c66260_g3	GO:0015079	molecular_function	potassium ion transmembrane transporter activity
c66260_g3	GO:0009674	molecular_function	potassium:sodium symporter activity
c66260_g3	GO:0015079	molecular_function	potassium ion transmembrane transporter activity
c66260_g3	GO:0015079	molecular_function	potassium ion transmembrane transporter activity
c66260_g3	GO:0009674	molecular_function	potassium:sodium symporter activity
c66279_g4	GO:0051213	molecular_function	dioxygenase activity
c66279_g4	GO:0046872	molecular_function	metal ion binding
c66318_g3	GO:0005524	molecular_function	ATP binding
c66318_g3	GO:0004674	molecular_function	protein serine/threonine kinase activity
c66318_g3	GO:0004713	molecular_function	protein tyrosine kinase activity
c67351_g4	GO:0020037	molecular_function	heme binding
c67351_g4	GO:0005506	molecular_function	iron ion binding
c67351_g4	GO:0004497	molecular_function	monooxygenase activity
c67351_g4	GO:0016705	molecular_function	oxidoreductase activity, acting on paired donors, with incorporation or reduction of molecular oxygen
c67351_g4	GO:0020037	molecular_function	heme binding
c67351_g4	GO:0005506	molecular_function	iron ion binding
c67351_g4	GO:0004497	molecular_function	monooxygenase activity
c67351_g4	GO:0016705	molecular_function	oxidoreductase activity, acting on paired donors, with incorporation or reduction of molecular oxygen
c67801_g4	GO:0003677	molecular_function	DNA binding
c67801_g4	GO:0003700	molecular_function	sequence-specific DNA binding transcription factor activity
c67892_g3	GO:0005524	molecular_function	ATP binding
c67892_g3	GO:0015226	molecular_function	carnitine transmembrane transporter activity
c67892_g3	GO:0005524	molecular_function	ATP binding
c67892_g3	GO:0015226	molecular_function	carnitine transmembrane transporter activity
c67892_g3	GO:0005524	molecular_function	ATP binding
c67892_g3	GO:0015226	molecular_function	carnitine transmembrane transporter activity
c67892_g3	GO:0005524	molecular_function	ATP binding
c67892_g3	GO:0015226	molecular_function	carnitine transmembrane transporter activity
c67892_g3	GO:0005524	molecular_function	ATP binding
c67892_g3	GO:0015226	molecular_function	carnitine transmembrane transporter activity
c68046_g2	GO:0005215	molecular_function	transporter activity
c68046_g2	GO:0005215	molecular_function	transporter activity
c68046_g2	GO:0005215	molecular_function	transporter activity
c68046_g2	GO:0005215	molecular_function	transporter activity
c68046_g2	GO:0005215	molecular_function	transporter activity
c68127_g2	GO:0005524	molecular_function	ATP binding
c68127_g2	GO:0000287	molecular_function	magnesium ion binding
c68127_g2	GO:0030955	molecular_function	potassium ion binding
c68127_g2	GO:0004743	molecular_function	pyruvate kinase activity
c68127_g2	GO:0005524	molecular_function	ATP binding
c68127_g2	GO:0000287	molecular_function	magnesium ion binding
c68127_g2	GO:0030955	molecular_function	potassium ion binding
c68127_g2	GO:0004743	molecular_function	pyruvate kinase activity
c68127_g2	GO:0005524	molecular_function	ATP binding
c68127_g2	GO:0000287	molecular_function	magnesium ion binding
c68127_g2	GO:0030955	molecular_function	potassium ion binding
c68127_g2	GO:0004743	molecular_function	pyruvate kinase activity
c68127_g2	GO:0005524	molecular_function	ATP binding
[truncated: 107 more rows]
